# Supplementary material for: Asymmetric difluoroalkylation via Michael addition of an in situ generated difluoroenol intermediate
Source: Royal Society of Chemistry journal article supplement (doi:10.1039/d4qo00987h), 2024-01-01
Supplement: d4qo00987h1.pdf [file d4qo00987h1.pdf]

## Supplementary Materials

### Asymmetric difluoroalkylation *via* Michael addition of *in situ* generated difluoroenol intermediate

Xiongda Xie,<sup>‡a</sup> Gang Chen,<sup>‡a</sup> Jingjing Huang,<sup>\*b</sup> Yongqiang Liu<sup>\*c</sup> and Xinfang Xu<sup>\*a</sup>

<sup>a</sup>*School of Pharmaceutical Sciences, Sun Yat-sen University, Guangzhou 510006, China*

<sup>b</sup>*School of Chemistry, Sun Yat-sen University, Guangzhou 510006, China*

<sup>c</sup>*Research Center of Chinese Herbal Resource Science and Engineering, School of Pharmaceutical Sciences, Guangzhou University of Chinese Medicine, Guangzhou 510120, China.*

<sup>‡</sup>*These authors contributed equally.*

*E-mail: huangjj256@mail.sysu.edu.cn; liuyq@gzucm.edu.cn;  
xuxinfang@mail.sysu.edu.cn.*

### Table of Contents

|                                                                          |                 |
|--------------------------------------------------------------------------|-----------------|
| <b>1. General Information</b>                                            | <b>S2</b>       |
| <b>2. Condition Optimization</b>                                         | <b>S3</b>       |
| <b>3. General Procedure for the Asymmetric Michael Addition Reaction</b> | <b>S3-S21</b>   |
| <b>4. Control Experiment</b>                                             | <b>S22-S23</b>  |
| <b>5. General Procedure for Scale Up and Synthetic Applications</b>      | <b>S23-S26</b>  |
| <b>6. NMR Spectra of New Compounds 3-6</b>                               | <b>S27-S74</b>  |
| <b>7. HPLC Analyses Figures of Compounds 3-6</b>                         | <b>S75-S107</b> |
| <b>8. Single-Crystal X-ray Diffraction of 5</b>                          | <b>S108</b>     |
| <b>9. References</b>                                                     | <b>S109</b>     |

## 1. General Information

All reactions were performed in oven-dried glassware under atmosphere of argon. Solvents were purified and distilled by following the standard methods. Analytical thin-layer chromatography was performed using glass plates pre-coated with 200-300 mesh silica gel impregnated with a fluorescent indicator (254 nm). Flash column chromatography was performed using silica gel (300-400 mesh). The  $^1\text{H}$  NMR,  $^{13}\text{C}$  NMR, and  $^{19}\text{F}$  NMR spectra were recorded in  $\text{CDCl}_3$  or  $\text{DMSO-d}_6$  on 400 MHz and 500 MHz spectrometer; chemical shifts were reported in ppm with the solvent signal as reference, and coupling constants ( $J$ ) were given in Hertz. The peak information was described as: s = singlet, d = doublet, t = triplet, q = quartet, m = multiplet, comp = composite. The enantioselectivity was determined on HPLC using Chiralpak AD-H and IG-3 column. High-resolution mass spectra (HRMS) were recorded on a commercial apparatus (ESI Source). All substrates whose syntheses were not described herein were either obtained from commercial suppliers or prepared using the referenced literature procedures.<sup>[1-4]</sup> Unless stated otherwise, all commercially available compounds (Energy Chemical, Bidepharmatech) were used as received.

## 2. Condition Optimization

**Table S1:** Optimization of metal catalysts.<sup>[a]</sup>

| Entry | Metal (x mol%)                                   | Yield % <sup>[b]</sup><br><b>3a</b> | ee % <sup>[c]</sup> |
|-------|--------------------------------------------------|-------------------------------------|---------------------|
| 1     | Rh <sub>2</sub> (OAc) <sub>4</sub> (2.0 mol%)    | 35                                  | 95                  |
| 2     | Rh <sub>2</sub> (esp) <sub>2</sub> (1.0 mol%)    | 95                                  | 95                  |
| 3     | Cu(MeCN) <sub>4</sub> PF <sub>6</sub> (5.0 mol%) | <5                                  | -                   |
| 4     | FeTPPCl (5.0 mol%)                               | <5                                  | -                   |
| 5     | CoTPP (5.0 mol%)                                 | <5                                  | -                   |
| 6     | Pd(OAc) <sub>2</sub> (5.0 mol%)                  | <5                                  | -                   |

<sup>a</sup>The reaction was carried out on a 0.1 mmol scale: to the mixture of metal catalyst (x mol%), H<sub>2</sub>O (2.7 μL, 0.15 mmol), Zn(OTf)<sub>2</sub> (1.9 mg, 5.0 mol%), and **L8** (5.2 mg, 6.0 mol%) in EA (0.5 mL), was added a solution of diazo compound **1a** (27.9 mg, 0.15 mmol) and **2a** (19.5 mg, 0.1 mmol) in EA (1.0 mL) *via* syringe in one pot under an argon atmosphere at 30 °C, and the reaction mixture was stirred for additional 3 h under these conditions.

## 3. General Procedure for the Asymmetric Michael Addition Reaction

To a 10-mL oven-dried vial containing a magnetic stirring bar, Rh<sub>2</sub>(esp)<sub>2</sub> (0.8 mg, 1.0 mol%), H<sub>2</sub>O (2.7 μL, 0.15 mmol), Zn(OTf)<sub>2</sub> (1.9 mg, 5.0 mol%) and **L8** (6.0 mol%) in Ethyl acetate (EA, 0.5 mL), was added a solution of diazo compound **1** (0.15 mmol) in 0.5 mL EA and **2** (0.1 mmol) in 1.0 mL EA *via* syringe in one pot under an argon atmosphere at 30 °C after 15 min, and the reaction mixture was stirred for an additional 3 h under these conditions until consumption of the material (monitored by TLC). Then the reaction mixture was purified by column chromatography on silica gel without any additional treatment (Hexanes : EtOAc = 4:1 to 2:1) to give the pure products **3** and **4** in good to high yields with excellent enantioselectivity.

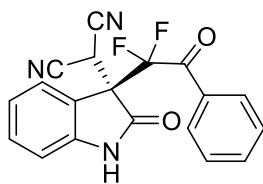

**(R)-2-(3-(1,1-Difluoro-2-oxo-2-phenylethyl)-2-oxoindolin-3-yl)malononitrile (3a).**

Pale yellow solid. mp = 169 - 171 °C, 33.3 mg, 95% yield. 95% *ee*.  $[\alpha]_{\text{D}}^{20} = +7.1$  (*c* = 0.5, MeOH);  $^1\text{H}$  NMR (500 MHz,  $\text{CDCl}_3$ ) ( $\delta$ , ppm) 8.78 (s, 1H), 8.02 – 7.97 (m, 2H), 7.70 – 7.61 (m, 2H), 7.50 – 7.44 (m, 2H), 7.46 – 7.39 (m, 1H), 7.18 – 7.11 (m, 1H), 7.07 – 7.01 (m, 1H), 4.95 (s, 1H);  $^{13}\text{C}$  NMR (126 MHz,  $\text{CDCl}_3$ ) ( $\delta$ , ppm) 185.5 (t, *J* = 36.0 Hz), 170.8 (d, *J* = 7.6 Hz), 142.0, 135.6, 132.1, 130.7, 130.5 (t, *J* = 3.3 Hz), 129.0, 125.9 (d, *J* = 3.3 Hz), 124.1, 120.9 (d, *J* = 3.7 Hz), 117.0 (dd, *J* = 272.1, 267.8 Hz), 111.6, 109.8, 109.0, 55.7 (t, *J* = 20.3 Hz), 27.1 (d, *J* = 5.9 Hz);  $^{19}\text{F}$  NMR (376 MHz,  $\text{CDCl}_3$ ) ( $\delta$ , ppm) -96.9 (d, *J* = 309.3 Hz, 1F), -98.7 (d, *J* = 309.7 Hz, 1F); HRMS (TOF MS  $\text{ESI}^+$ ) calculated for  $\text{C}_{19}\text{H}_{11}\text{F}_2\text{N}_3\text{O}_2\text{Na}$   $[\text{M}+\text{Na}]^+$ : 374.0717, found 374.0711; HPLC conditions for determination of enantiomeric excess: Chiralpak IG-3,  $\lambda = 254$  nm, hexane : 2-propanol = 85:15, flow rate = 1.0 mL/min,  $t_{\text{major}} = 18.3$  min,  $t_{\text{minor}} = 15.8$  min.

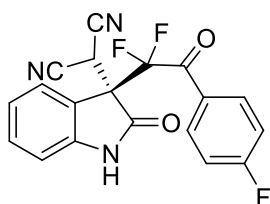

**(R)-2-(3-(1,1-Difluoro-2-(4-fluorophenyl)-2-oxoethyl)-2-oxoindolin-3-**

**yl)malononitrile (3b).** Pale yellow solid. mp = 73 - 75 °C, 33.2 mg, 90% yield. 96% *ee*.  $[\alpha]_{\text{D}}^{20} = +9.3$  (*c* = 0.5, MeOH);  $^1\text{H}$  NMR (400 MHz,  $\text{CDCl}_3$ ) ( $\delta$ , ppm) 8.62 (s, 1H), 8.09 – 8.01 (m, 2H), 7.70 – 7.64 (m, 1H), 7.48 – 7.39 (m, 1H), 7.21 – 7.10 (m, 3H), 7.08 – 7.01 (m, 1H), 4.93 (s, 1H);  $^{13}\text{C}$  NMR (101 MHz,  $\text{CDCl}_3$ ) ( $\delta$ , ppm) 184.2 (t, *J* = 30.8 Hz), 170.6 (d, *J* = 7.6 Hz), 168.5, 165.9, 142.0, 133.5, 132.2, 126.0 (d, *J* = 3.4 Hz), 124.2, 120.9 (d, *J* = 3.5 Hz), 117.0 (dd, *J* = 271.6, 267.8 Hz), 116.5 (d, *J* = 21.9

Hz), 111.7 (d,  $J = 7.9$  Hz), 109.8, 108.9, 55.7 (t,  $J = 20.3$  Hz), 27.1;  $^{19}\text{F}$  NMR (376 MHz,  $\text{CDCl}_3$ ) ( $\delta$ , ppm) -96.9 (d,  $J = 309.2$  Hz, 1F), -98.6 (d,  $J = 309.2$  Hz, 1F), -99.5 (s, 1F); HRMS (TOF MS  $\text{ESI}^+$ ) calculated for  $\text{C}_{19}\text{H}_{10}\text{F}_3\text{N}_3\text{O}_2\text{Na}$   $[\text{M}+\text{Na}]^+$ : 392.0623, found 392.0625; HPLC conditions for determination of enantiomeric excess: Chiralpak IG-3,  $\lambda = 254$  nm, hexane : 2-propanol = 83:17, flow rate = 1.0 mL/min,  $t_{\text{major}} = 19.1$  min,  $t_{\text{minor}} = 12.6$  min.

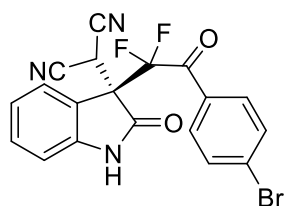

**(R)-2-(3-(2-(4-Bromophenyl)-1,1-difluoro-2-oxoethyl)-2-oxoindolin-3-**

**yl)malononitrile (3c).** Pale yellow solid. mp = 78 - 79 °C, 36.1 mg, 84% yield. 92% *ee*.  $[\alpha]_{\text{D}}^{20} = +10.2$  ( $c = 0.5$ , MeOH);  $^1\text{H}$  NMR (400 MHz,  $\text{CDCl}_3$ ) ( $\delta$ , ppm) 8.70 (s, 1H), 7.95 – 7.79 (m, 2H), 7.69 – 7.63 (m, 1H), 7.64 – 7.59 (m, 2H), 7.47 – 7.40 (m, 1H), 7.19 – 7.12 (m, 1H), 7.06 – 7.01 (m, 1H), 4.93 (s, 1H);  $^{13}\text{C}$  NMR (126 MHz,  $\text{CDCl}_3$ ) ( $\delta$ , ppm) 184.9 (t,  $J = 30.9$  Hz), 170.6 (d,  $J = 7.7$  Hz), 141.9, 132.5, 132.2, 131.8 (t,  $J = 3.3$  Hz), 131.5, 129.4, 126.0 (d,  $J = 3.4$  Hz), 124.2, 120.7 (d,  $J = 3.6$  Hz), 116.9 (dd,  $J = 271.6, 267.3$  Hz), 111.6, 109.7, 108.9, 55.6 (t,  $J = 20.3$  Hz), 27.1 (dd,  $J = 8.3, 2.8$  Hz);  $^{19}\text{F}$  NMR (376 MHz,  $\text{CDCl}_3$ ) ( $\delta$ , ppm) -97.3 (d,  $J = 309.3$  Hz, 1F), -98.9 (d,  $J = 309.3$  Hz, 1F); HRMS (TOF MS  $\text{ESI}^+$ ) calculated for  $\text{C}_{19}\text{H}_{10}\text{BrF}_2\text{N}_3\text{O}_2\text{Na}$   $[\text{M}+\text{Na}]^+$ : 451.9822, found 451.9820; HPLC conditions for determination of enantiomeric excess: Chiralpak AD-H,  $\lambda = 254$  nm, hexane : 2-propanol = 80:20, flow rate = 1.0 mL/min,  $t_{\text{major}} = 52.5$  min,  $t_{\text{minor}} = 28.2$  min.

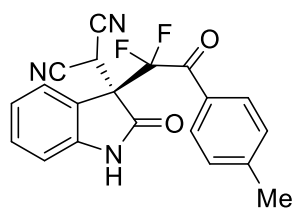

**(R)-2-(3-(1,1-Difluoro-2-oxo-2-(p-tolyl)ethyl)-2-oxoindolin-3-yl)malononitrile (3d).**

Pale yellow foamy solid. mp = 63 - 66 °C, 32.8 mg, 90% yield. 95% *ee*.  $[\alpha]_{\text{D}}^{20} = +14.4$  (*c* = 0.5, MeOH);  $^1\text{H NMR}$  (500 MHz,  $\text{CDCl}_3$ ) ( $\delta$ , ppm) 8.44 (s, 1H), 7.97 – 7.86 (m, 2H), 7.69 – 7.64 (m, 1H), 7.51 – 7.36 (m, 1H), 7.30 – 7.26 (m, 2H), 7.15 (m, 1H), 7.15 – 6.97 (m, 1H), 4.91 (s, 1H), 2.42 (s, 3H);  $^{13}\text{C NMR}$  (126 MHz,  $\text{CDCl}_3$ ) ( $\delta$ , ppm) 185.0 (t, *J* = 30.2 Hz), 170.6 (d, *J* = 7.8 Hz), 147.2, 141.9, 132.0, 130.7 (d, *J* = 3.2 Hz), 129.8, 128.1, 126.0 (d, *J* = 3.4 Hz), 124.0, 121.1 (d, *J* = 3.7 Hz), 117.8 (dd, *J* = 267.8, 268.0 Hz), 111.5, 109.8, 109.0, 55.6 (t, *J* = 20.3 Hz), 27.1 (d, *J* = 9.5 Hz), 22.1;  $^{19}\text{F NMR}$  (376 MHz,  $\text{CDCl}_3$ ) ( $\delta$ , ppm) -96.6 (d, *J* = 309.2 Hz, 1F), -98.5 (d, *J* = 309.1 Hz, 1F); HRMS (TOF MS  $\text{ESI}^+$ ) calculated for  $\text{C}_{20}\text{H}_{13}\text{F}_2\text{N}_3\text{O}_2\text{Na}$   $[\text{M}+\text{Na}]^+$ : 388.0874, found 388.0874; HPLC conditions for determination of enantiomeric excess: Chiralpak AD-H,  $\lambda = 254$  nm, hexane : 2-propanol = 80:20, flow rate = 1.0 mL/min,  $t_{\text{major}} = 25.2$  min,  $t_{\text{minor}} = 31.8$  min.

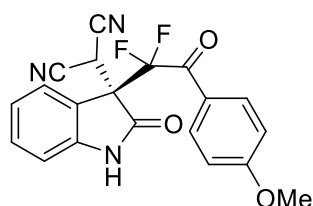

**(R)-2-(3-(1,1-Difluoro-2-(4-methoxyphenyl)-2-oxoethyl)-2-oxoindolin-3-**

**yl)malononitrile (3e).** Pale yellow solid. mp = 70 - 72 °C, 35.4 mg, 93% yield. 96% *ee*.  $[\alpha]_{\text{D}}^{20} = +17.5$  (*c* = 0.5, MeOH);  $^1\text{H NMR}$  (500 MHz,  $\text{CDCl}_3$ ) ( $\delta$ , ppm) 8.23 (s, 1H), 8.03 – 7.98 (m, 2H), 7.70 – 7.64 (m, 1H), 7.47 – 7.40 (m, 1H), 7.18 – 7.13 (m, 1H), 7.08 – 7.01 (m, 1H), 6.98 – 6.89 (m, 2H), 4.89 (s, 1H), 3.88 (s, 3H);  $^{13}\text{C NMR}$  (126 MHz,  $\text{CDCl}_3$ ) ( $\delta$ , ppm) 183.7 (t, *J* = 29.9 Hz), 170.6 (d, *J* = 7.9 Hz), 165.5, 141.9, 133.2 (d, *J* = 3.3 Hz), 132.0, 126.0 (d, *J* = 3.5 Hz), 124.0, 123.4, 121.2 (d, *J* = 3.7 Hz), 117.5 (dd, *J* = 272.4, 268.3 Hz), 114.4, 111.4, 109.9, 109.0, 55.8, 55.5 (t, *J* = 20.2 Hz), 27.1 (d, *J* = 9.0 Hz);  $^{19}\text{F NMR}$  (376 MHz,  $\text{CDCl}_3$ ) ( $\delta$ , ppm) -96.1 (d, *J* = 307.6 Hz, 1F), -98.0 (d, *J* = 307.2 Hz, 1F); HRMS (TOF MS  $\text{ESI}^+$ ) calculated for  $\text{C}_{20}\text{H}_{13}\text{F}_2\text{N}_3\text{O}_3\text{Na}$   $[\text{M}+\text{Na}]^+$ : 404.0823, found 404.0825; HPLC conditions for

determination of enantiomeric excess: Chiralpak AD-H ,  $\lambda = 254$  nm, hexane : 2-propanol = 75:25, flow rate = 1.0 mL/min,  $t_{\text{major}} = 29.9$  min,  $t_{\text{minor}} = 43.5$  min.

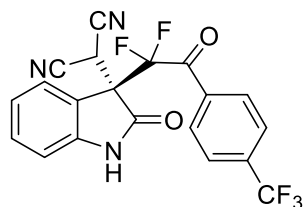

**(R)-2-(3-(1,1-Difluoro-2-oxo-2-(4-(trifluoromethyl)phenyl)ethyl)-2-oxoindolin-3-yl)malononitrile (3f)**. Pale yellow solid. mp = 68 - 69 °C, 37.3 mg, 89% yield. 95% *ee*.  $[\alpha]_{\text{D}}^{20} = +12.1$  ( $c = 0.5$ , MeOH);  $^1\text{H}$  NMR (400 MHz,  $\text{CDCl}_3$ ) ( $\delta$ , ppm) 9.04 (s, 1H), 8.12 – 8.05 (m, 2H), 7.76 – 7.65 (comp, 3H), 7.48 – 7.39 (m, 1H), 7.21 – 7.13 (m, 1H), 7.09 – 7.02 (m, 1H), 5.01 (s, 1H);  $^{13}\text{C}$  NMR (101 MHz,  $\text{CDCl}_3$ ) ( $\delta$ , ppm) 185.3 (t,  $J = 31.2$  Hz), 170.8 (d,  $J = 6.9$  Hz), 142.0, 136.4 (q,  $J = 33.0$  Hz), 133.5, 132.3, 130.8, 126.0 (d,  $J = 3.7$  Hz), 124.6, 124.2, 121.9, 120.6 (d,  $J = 3.3$  Hz), 116.6 (dd,  $J = 271.1$ , 267.1 Hz), 111.8 (d,  $J = 5.3$  Hz), 109.7, 108.8, 55.7 (t,  $J = 20.3$  Hz), 27.0;  $^{19}\text{F}$  NMR (376 MHz,  $\text{CDCl}_3$ ) ( $\delta$ , ppm) -63.6 (s, 3F), -97.9 (d,  $J = 309.6$  Hz, 1F), -99.3 (d,  $J = 309.8$  Hz, 1F); HRMS (TOF MS  $\text{ESI}^+$ ) calculated for  $\text{C}_{20}\text{H}_{11}\text{F}_5\text{N}_3\text{O}_2$   $[\text{M}+\text{H}]^+$ : 420.0771, found 420.0762; HPLC conditions for determination of enantiomeric excess: Chiralpak AD-H ,  $\lambda = 254$  nm, hexane : 2-propanol = 78:22, flow rate = 1.0 mL/min,  $t_{\text{major}} = 54.0$  min,  $t_{\text{minor}} = 20.4$  min.

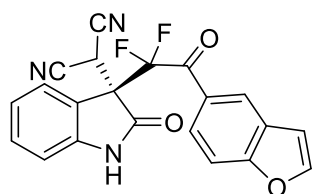

**(R)-2-(3-(2-(Benzofuran-5-yl)-1,1-difluoro-2-oxoethyl)-2-oxoindolin-3-yl)malononitrile (3g)**. Pale yellow solid. mp = 73 -74 °C, 35.6 mg, 91% yield. 95% *ee*.  $[\alpha]_{\text{D}}^{20} = +4.4$  ( $c = 0.5$ , MeOH);  $^1\text{H}$  NMR (400 MHz,  $\text{CDCl}_3$ ) ( $\delta$ , ppm) 8.67 (s, 1H), 8.36 (s, 1H), 8.00 – 7.92 (m, 1H), 7.72 – 7.65 (m, 2H), 7.57 – 7.50 (m, 1H), 7.45 – 7.37 (m, 1H), 7.18 – 7.10 (m, 1H), 7.07 – 7.01 (m, 1H), 6.85 (s, 1H), 4.97 (s, 1H);  $^{13}\text{C}$

NMR (126 MHz, CDCl<sub>3</sub>) ( $\delta$ , ppm) 185.0 (t,  $J = 30.9$  Hz), 170.9 (d,  $J = 8.2$  Hz), 158.6, 147.2, 142.0, 132.0, 128.0, 127.1, 125.9, 125.8, 125.5 (d,  $J = 4.3$  Hz), 124.0, 121.1 (d,  $J = 3.8$  Hz), 117.4 (dd,  $J = 271.9, 268.3$  Hz), 112.3, 111.5, 109.9, 109.0, 107.6 (d,  $J = 2.5$  Hz), 55.7 (t,  $J = 20.3$  Hz), 27.1 (d,  $J = 8.6$  Hz); <sup>19</sup>F NMR (376 MHz, CDCl<sub>3</sub>) ( $\delta$ , ppm) -95.6 (d,  $J = 307.9$  Hz, 1F), -97.6 (d,  $J = 308.2$  Hz, 1F); HRMS (TOF MS ESI<sup>+</sup>) calculated for C<sub>21</sub>H<sub>11</sub>F<sub>2</sub>N<sub>3</sub>O<sub>3</sub>Na [M+Na]<sup>+</sup>: 414.0666, found 414.0660; HPLC conditions for determination of enantiomeric excess: Chiralpak AD-H,  $\lambda = 254$  nm, hexane : 2-propanol = 80:20, flow rate = 1.0 mL/min,  $t_{\text{major}} = 30.7$  min,  $t_{\text{minor}} = 39.4$  min.

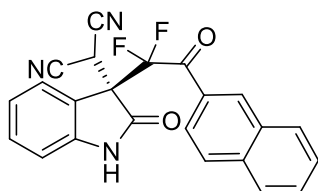

**(R)-2-(3-(1,1-Difluoro-2-(naphthalen-2-yl)-2-oxoethyl)-2-oxoindolin-3-**

**yl)malononitrile (3h).** Pale red solid. mp = 88 - 89 °C, 36.1 mg, 90% yield. 95% *ee*.  $[\alpha]_{\text{D}}^{20} = +19.2$  ( $c = 0.5$ , MeOH); <sup>1</sup>H NMR (400 MHz, CDCl<sub>3</sub>) ( $\delta$ , ppm) 8.67 - 8.58 (m, 2H), 7.99 - 7.88 (m, 2H), 7.88 - 7.81 (m, 2H), 7.73 - 7.61 (m, 2H), 7.61 - 7.53 (m, 1H), 7.46 - 7.37 (m, 1H), 7.19 - 7.10 (m, 1H), 7.08 - 7.01 (m, 1H), 4.98 (s, 1H); <sup>13</sup>C NMR (101 MHz, CDCl<sub>3</sub>) ( $\delta$ , ppm) 185.5 (t,  $J = 30.2$  Hz), 170.7 (d,  $J = 7.5$  Hz), 142.1, 136.5, 133.7, 133.6, 132.2, 132.1, 130.4, 130.2, 129.0, 127.9, 127.5, 126.0 (d,  $J = 3.5$  Hz), 124.5, 124.0, 121.1 (d,  $J = 3.6$  Hz), 117.3 (dd,  $J = 272.2, 268.0$  Hz), 111.6 (d,  $J = 7.3$  Hz), 110.0, 109.1, 55.8 (t,  $J = 20.4$  Hz), 27.2 (d,  $J = 6.2$  Hz); <sup>19</sup>F NMR (376 MHz, CDCl<sub>3</sub>) ( $\delta$ , ppm) -96.0 (d,  $J = 307.9$  Hz, 1F), -97.9 (d,  $J = 307.9$  Hz, 1F); HRMS (TOF MS ESI<sup>+</sup>) calculated for C<sub>23</sub>H<sub>13</sub>F<sub>2</sub>N<sub>3</sub>O<sub>2</sub>Na [M+Na]<sup>+</sup>: 424.0874, found 424.0875; HPLC conditions for determination of enantiomeric excess: Chiralpak IG-3,  $\lambda = 254$  nm, hexane : 2-propanol = 80:20, flow rate = 1.0 mL/min,  $t_{\text{major}} = 24.1$  min,  $t_{\text{minor}} = 19.7$  min.



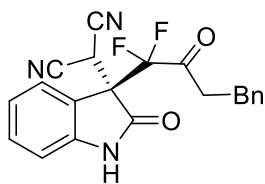

**(R)-2-(3-(1,1-Difluoro-2-oxo-4-phenylbutyl)-2-oxoindolin-3-yl)malononitrile (3i).**

Yellow oil, 34.1 mg, 90% yield. 91% *ee*.  $[\alpha]_D^{20} = +40.3$  ( $c = 0.5$ , MeOH);  $^1\text{H NMR}$  (400 MHz,  $\text{CDCl}_3$ ) ( $\delta$ , ppm) 8.34 (s, 1H), 7.73 – 7.64 (m, 1H), 7.49 – 7.41 (m, 1H), 7.29 – 7.16 (comp, 4H), 7.10 – 7.04 (m, 2H), 7.01 – 6.94 (m, 1H), 4.89 (s, 1H), 3.08 – 2.95 (m, 1H), 2.94 – 2.75 (m, 3H);  $^{13}\text{C NMR}$  (126 MHz,  $\text{CDCl}_3$ ) ( $\delta$ , ppm) 198.0 (dd,  $J = 33.6, 26.3$  Hz), 169.9 (d,  $J = 5.5$  Hz), 141.7, 139.5, 132.4, 128.7, 128.4, 126.6, 126.3, 124.5, 119.9 (d,  $J = 2.7$  Hz), 113.7 (dd,  $J = 264.0, 245.9$  Hz), 111.6, 109.7, 109.0, 55.5 (t,  $J = 22.4$  Hz), 39.4, 28.3, 26.5 (d,  $J = 4.9$  Hz);  $^{19}\text{F NMR}$  (376 MHz,  $\text{CDCl}_3$ ) ( $\delta$ , ppm) -105.9 (d,  $J = 286.6$  Hz, 1F), -107.9 (d,  $J = 285.6$  Hz, 1F); HRMS (TOF MS ESI<sup>+</sup>) calculated for  $\text{C}_{21}\text{H}_{15}\text{F}_2\text{N}_3\text{O}_2\text{Na}$   $[\text{M}+\text{Na}]^+$ : 402.1030, found 402.1025; HPLC conditions for determination of enantiomeric excess: Chiralpak IG-3,  $\lambda = 254$  nm, hexane : 2-propanol = 87:13, flow rate = 1.0 mL/min,  $t_{\text{major}} = 16.6$  min,  $t_{\text{minor}} = 12.3$  min.

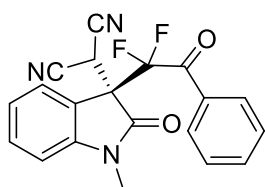

**(R)-2-(3-(1,1-Difluoro-2-oxo-2-phenylethyl)-1-methyl-2-oxoindolin-3-**

**yl)malononitrile (4a).** Pale green solid. mp = 161 - 163 °C, 32.8 mg, 90% yield. 99% *ee*.  $[\alpha]_D^{20} = +8.6$  ( $c = 0.5$ , MeOH);  $^1\text{H NMR}$  (500 MHz,  $\text{CDCl}_3$ ) ( $\delta$ , ppm) 8.03 – 7.95 (m, 2H), 7.73 – 7.68 (m, 1H), 7.68 – 7.61 (m, 1H), 7.56 – 7.49 (m, 1H), 7.50 – 7.43 (m, 2H), 7.22 – 7.15 (m, 1H), 7.07 – 7.02 (m, 1H), 4.92 (s, 1H), 3.36 (s, 3H);  $^{13}\text{C NMR}$  (126 MHz,  $\text{CDCl}_3$ ) ( $\delta$ , ppm) 185.3 (t,  $J = 30.6$  Hz), 169.1 (d,  $J = 8.1$  Hz), 144.9, 135.5, 132.1, 130.7, 130.4 (t,  $J = 3.3$  Hz), 129.0, 125.7 (d,  $J = 3.4$  Hz), 124.0, 120.4 (d,  $J = 3.9$  Hz), 116.9 (dd,  $J = 267.4$  Hz,  $J = 266.7, 267.4$  Hz), 109.9, 109.8, 108.9, 55.2 (t,

$J = 20.2$  Hz), 27.2, 27.1 (dd,  $J = 8.8, 2.5$  Hz);  $^{19}\text{F}$  NMR (376 MHz,  $\text{CDCl}_3$ ) ( $\delta$ , ppm) - 96.8 (d,  $J = 309.3$  Hz, 1F), -98.8 (d,  $J = 309.4$  Hz, 1F); HRMS (TOF MS  $\text{ESI}^+$ ) calculated for  $\text{C}_{20}\text{H}_{13}\text{F}_2\text{N}_3\text{O}_2\text{Na}$   $[\text{M}+\text{Na}]^+$ : 388.0874, found 388.0863; HPLC conditions for determination of enantiomeric excess: Chiralpak AD-H,  $\lambda = 254$  nm, hexane : 2-propanol = 70:30, flow rate = 1.0 mL/min,  $t_{\text{major}} = 20.6$  min,  $t_{\text{minor}} = 51.9$  min.

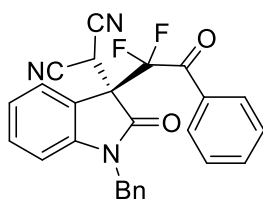

**(R)-2-(1-benzyl-3-(1,1-Difluoro-2-oxo-2-phenylethyl)-2-oxoindolin-3-yl)malononitrile (4b).**

Pale green solid. mp = 155 - 157 °C, 39.7 mg, 90% yield. 99% *ee*.  $[\alpha]_{\text{D}}^{20} = +15.3$  ( $c = 0.5$ , MeOH);  $^1\text{H}$  NMR (400 MHz,  $\text{CDCl}_3$ ) ( $\delta$ , ppm) 8.05 – 7.97 (m, 2H), 7.74 – 7.68 (m, 1H), 7.70 – 7.61 (m, 1H), 7.52 – 7.44 (comp, 4H), 7.43 – 7.34 (comp, 3H), 7.36 – 7.28 (m, 1H), 7.19 – 7.11 (m, 1H), 6.93 – 6.77 (m, 1H), 5.02 (dd,  $J = 15.8, 15.9$  Hz, 2H), 4.97 (s, 1H);  $^{13}\text{C}$  NMR (101 MHz,  $\text{CDCl}_3$ ) ( $\delta$ , ppm), 185.6 (t,  $J = 31.5$  Hz), 169.5 (d,  $J = 7.7$  Hz), 144.4, 135.5, 134.4, 132.0, 130.8, 130.5, 129.0, 128.9, 128.2, 127.7, 125.8 (d,  $J = 3.5$  Hz), 124.1, 120.4 (d,  $J = 3.6$  Hz), 117.0 (dd,  $J = 272.2, 268.3$  Hz), 111.0 (d,  $J = 9.4$  Hz), 110.0, 109.1, 55.4 (t,  $J = 20.4$  Hz), 45.4, 27.1 (d,  $J = 10.0$  Hz);  $^{19}\text{F}$  NMR (376 MHz,  $\text{CDCl}_3$ ) ( $\delta$ , ppm) -96.9 (d,  $J = 308.5$  Hz, 1F), -98.7 (d,  $J = 308.4$  Hz, 1F); HRMS (TOF MS  $\text{ESI}^+$ ) calculated for  $\text{C}_{26}\text{H}_{17}\text{F}_2\text{N}_3\text{O}_2\text{Na}$   $[\text{M}+\text{Na}]^+$ : 464.1187, found 464.1178; HPLC conditions for determination of enantiomeric excess: Chiralpak IG-3,  $\lambda = 254$  nm, hexane : 2-propanol = 87:13, flow rate = 1.0 mL/min,  $t_{\text{major}} = 30.2$  min,  $t_{\text{minor}} = 51.6$  min.

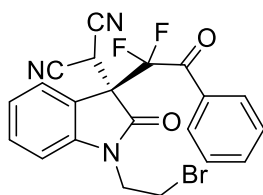

**(R)-2-(1-(2-Bromoethyl)-3-(1,1-difluoro-2-oxo-2-phenylethyl)-2-oxoindolin-3-yl)malononitrile (4c).** Pale green solid. mp = 160 – 161 °C, 43.4 mg, 95% yield. 99% *ee*.  $[\alpha]_D^{20} = +10.4$  (c = 0.5, MeOH);  $^1\text{H NMR}$  (400 MHz,  $\text{CDCl}_3$ ) ( $\delta$ , ppm) 8.04 – 7.94 (m, 2H), 7.74 – 7.68 (m, 1H), 7.70 – 7.62 (m, 1H), 7.58 – 7.49 (m, 1H), 7.52 – 7.44 (m, 2H), 7.24 – 7.15 (m, 1H), 7.17 – 7.10 (m, 1H), 4.88 (s, 1H), 4.24 (td,  $J = 7.5, 1.4$  Hz, 2H), 3.62 (t,  $J = 7.6$  Hz, 2H);  $^{13}\text{C NMR}$  (101 MHz,  $\text{CDCl}_3$ ) ( $\delta$ , ppm) 185.2 (t,  $J = 30.6$  Hz), 169.2 (d,  $J = 7.9$  Hz), 143.7, 135.6, 132.2, 130.6 (d,  $J = 3.3$  Hz), 130.5, 129.1, 126.1 (d,  $J = 3.6$  Hz), 124.4 (d,  $J = 5.6$  Hz), 120.3 (d,  $J = 3.7$  Hz), 117.1 (dd,  $J = 272.7, 268.3$  Hz), 110.0 (d,  $J = 7.7$  Hz), 109.8, 108.9, 55.0 (t,  $J = 20.1$  Hz), 42.7, 27.0 (d,  $J = 9.1$  Hz), 25.9;  $^{19}\text{F NMR}$  (376 MHz,  $\text{CDCl}_3$ ) ( $\delta$ , ppm) -96.8 (d,  $J = 309.6$  Hz, 1F), -98.6 (d,  $J = 309.5$  Hz, 1F); HRMS (TOF MS  $\text{ESI}^+$ ) calculated for  $\text{C}_{21}\text{H}_{14}\text{BrF}_2\text{N}_3\text{O}_2\text{Na}$   $[\text{M}+\text{Na}]^+$ : 480.0135, found 480.0137; HPLC conditions for determination of enantiomeric excess: Chiralpak IG-3,  $\lambda = 254$  nm, hexane : 2-propanol = 70:30, flow rate = 1.0 mL/min,  $t_{\text{major}} = 17.9$  min,  $t_{\text{minor}} = 49.7$  min.

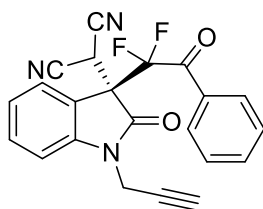

**(R)-2-(3-(1,1-Difluoro-2-oxo-2-phenylethyl)-2-oxo-1-(prop-2-yn-1-yl)indolin-3-yl)malononitrile (4d).** Pale green solid. mp = 157 - 159 °C, 34.2 mg, 88% yield. 99% *ee*.  $[\alpha]_D^{20} = +6.1$  (c = 0.5, MeOH);  $^1\text{H NMR}$  (400 MHz,  $\text{CDCl}_3$ ) ( $\delta$ , ppm) 8.05 – 7.93 (m, 2H), 7.75 – 7.68 (m, 1H), 7.70 – 7.61 (m, 1H), 7.60 – 7.51 (m, 1H), 7.52 – 7.43 (m, 2H), 7.31 – 7.24 (m, 1H), 7.26 – 7.18 (m, 1H), 4.89 (s, 1H), 4.63 (dd,  $J = 2.6, 1.3$  Hz, 2H), 2.37 (t,  $J = 2.6$  Hz, 1H);  $^{13}\text{C NMR}$  (126 MHz,  $\text{CDCl}_3$ ) ( $\delta$ , ppm) 185.1 (t,  $J = 30.5$  Hz), 168.4 (d,  $J = 8.2$  Hz), 143.1, 135.6, 132.1, 130.5, 130.4, 129.0, 125.8 (d,  $J = 3.7$  Hz), 124.4, 120.3 (d,  $J = 3.9$  Hz), 117.0 (dd,  $J = 268.0, 267.6$  Hz), 110.8, 109.8, 108.6, 75.3, 73.6, 55.0 (t,  $J = 20.2$  Hz), 30.3, 27.0 (dd,  $J = 8.8, 2.5$  Hz);  $^{19}\text{F NMR}$  (376 MHz,  $\text{CDCl}_3$ ) ( $\delta$ , ppm) -96.9 (d,  $J = 310.2$  Hz, 1F), -98.6 (d,  $J = 310.5$  Hz, 1F); HRMS (TOF MS  $\text{ESI}^+$ ) calculated for  $\text{C}_{22}\text{H}_{13}\text{F}_2\text{N}_3\text{O}_2\text{Na}$   $[\text{M}+\text{Na}]^+$ : 412.0874, found

412.0872; HPLC conditions for determination of enantiomeric excess: Chiralpak AD-H,  $\lambda = 254$  nm, hexane : 2-propanol = 65:35, flow rate = 1.0 mL/min,  $t_{\text{major}} = 27.1$  min,  $t_{\text{minor}} = 63.9$  min.

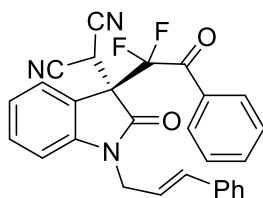

**(R)-2-(1-Cinnamyl-3-(1,1-difluoro-2-oxo-2-phenylethyl)-2-oxoindolin-3-yl)malononitrile (4e).** Pale green solid. mp = 169 - 171 °C, 42.1 mg, 90% yield. 99% *ee*.  $[\alpha]_{\text{D}}^{20} = +10.8$  ( $c = 0.5$ , MeOH);  $^1\text{H NMR}$  (400 MHz,  $\text{CDCl}_3$ ) ( $\delta$ , ppm) 8.10 – 7.99 (m, 2H), 7.76 – 7.70 (m, 1H), 7.69 – 7.61 (m, 1H), 7.52-7.43 (m, 3H), 7.43 – 7.37 (m, 2H), 7.37 – 7.28 (m, 2H), 7.30 – 7.23 (m, 1H), 7.22 – 7.14 (m, 1H), 7.14 – 7.06 (m, 1H), 6.82 (d,  $J = 16.0$  Hz, 1H), 6.29 (dt,  $J = 15.9, 5.7$  Hz, 1H), 4.95 (s, 1H), 4.68 – 4.59 (m, 2H);  $^{13}\text{C NMR}$  (101 MHz,  $\text{CDCl}_3$ ) ( $\delta$ , ppm) 185.3 (t,  $J = 30.5$  Hz), 169.0 (d,  $J = 7.8$  Hz), 144.2, 136.2, 135.5, 133.8, 132.1, 130.7 (d,  $J = 3.4$  Hz), 130.4 (t,  $J = 3.2$  Hz), 129.0, 128.7, 128.1, 126.7, 125.8 (d,  $J = 3.4$  Hz), 124.0, 121.5, 120.4 (d,  $J = 3.7$  Hz), 117.0 (dd,  $J = 272.5, 267.5$  Hz), 110.8, 110.0, 109.1, 55.2 (t,  $J = 20.1$  Hz), 43.1, 27.1 (dd,  $J = 8.8, 2.6$  Hz);  $^{19}\text{F NMR}$  (376 MHz,  $\text{CDCl}_3$ ) ( $\delta$ , ppm) -96.7 (d,  $J = 309.2$  Hz, 1F), -98.7 (d,  $J = 309.1$  Hz, 1F); HRMS (TOF MS  $\text{ESI}^+$ ) calculated for  $\text{C}_{28}\text{H}_{19}\text{F}_2\text{N}_3\text{O}_2\text{Na}$   $[\text{M}+\text{Na}]^+$ : 490.1343, found 490.1339; HPLC conditions for determination of enantiomeric excess: Chiralpak IG-3,  $\lambda = 254$  nm, hexane : 2-propanol = 70:30, flow rate = 1.0 mL/min,  $t_{\text{major}} = 23.9$  min,  $t_{\text{minor}} = 86.2$  min.

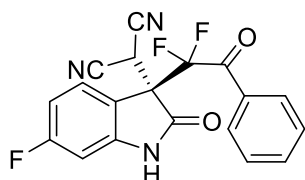

**(R)-2-(3-(1,1-Difluoro-2-oxo-2-phenylethyl)-6-fluoro-2-oxoindolin-3-yl)malononitrile (4f).** Pale yellow solid. mp = 156 - 158 °C, 33.2 mg, 90% yield.

96% *ee*.  $[\alpha]_{\text{D}}^{20} = +9.3$  ( $c = 0.5$ , MeOH);  $^1\text{H}$  NMR (400 MHz,  $\text{CDCl}_3$ ) ( $\delta$ , ppm) 8.48 (s, 1H), 8.04 – 7.98 (m, 2H), 7.71 – 7.59 (m, 2H), 7.53 – 7.45 (m, 2H), 6.89 – 6.76 (m, 2H), 4.89 (s, 1H);  $^{13}\text{C}$  NMR (126 MHz,  $\text{CDCl}_3$ ) ( $\delta$ , ppm) 185.4 (t,  $J = 30.1$  Hz), 170.8 (d,  $J = 8.0$  Hz), 166.1, 164.1, 143.7 (d,  $J = 12.3$  Hz), 135.8, 130.5 (t,  $J = 3.2$  Hz), 129.1, 127.6 (d,  $J = 10.6$  Hz), 117.0 (dd,  $J = 267.8, 267.6$  Hz), 116.4 (t,  $J = 3.6$  Hz), 110.8 (d,  $J = 22.9$  Hz), 109.7, 108.9, 100.4 (d,  $J = 27.9$  Hz), 55.3 (t,  $J = 20.3$  Hz), 27.1 (d,  $J = 8.9$  Hz);  $^{19}\text{F}$  NMR (376 MHz,  $\text{CDCl}_3$ ) ( $\delta$ , ppm) -96.7 (d,  $J = 310.7$  Hz, 1F), -98.6 (d,  $J = 310.8$  Hz, 1F), -105.4 (s, 1F); HRMS (TOF MS ESI<sup>+</sup>) calculated for  $\text{C}_{19}\text{H}_{10}\text{F}_3\text{N}_3\text{O}_2\text{Na}$   $[\text{M}+\text{Na}]^+$ : 392.0623, found 392.0621; HPLC conditions for determination of enantiomeric excess: Chiralpak IG-3,  $\lambda = 254$  nm, hexane : 2-propanol = 90:10, flow rate = 1.0 mL/min,  $t_{\text{major}} = 36.8$  min,  $t_{\text{minor}} = 52.4$  min.

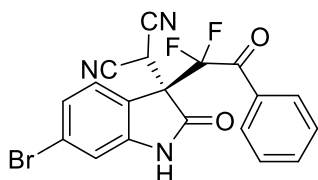

**(R)-2-(6-Bromo-3-(1,1-difluoro-2-oxo-2-phenylethyl)-2-oxoindolin-3-**

**yl)malononitrile (4g).** Pale yellow solid. mp = 189 - 191 °C, 38.6 mg, 90% yield. 95% *ee*.  $[\alpha]_{\text{D}}^{20} = +12.2$  ( $c = 0.5$ , MeOH);  $^1\text{H}$  NMR (500 MHz,  $\text{CDCl}_3$ ) ( $\delta$ , ppm) 9.10 – 9.00 (m, 1H), 8.04 – 7.98 (m, 2H), 7.71 – 7.64 (m, 1H), 7.54 – 7.45 (comp, 3H), 7.32 – 7.25 (m, 1H), 7.22 (s, 1H), 4.95 (s, 1H);  $^{13}\text{C}$  NMR (126 MHz,  $\text{CDCl}_3$ ) ( $\delta$ , ppm) 185.3 (t,  $J = 30.3$  Hz), 170.8 (d,  $J = 7.7$  Hz), 143.2, 135.8, 130.6, 130.3, 129.1, 127.1, 127.0 (d,  $J = 3.3$  Hz), 126.3, 119.8 (d,  $J = 3.9$  Hz), 117.0 (dd,  $J = 272.0, 267.5$  Hz), 115.2, 109.6, 108.8, 55.4 (t,  $J = 20.2$  Hz), 26.8 (d,  $J = 9.1$  Hz);  $^{19}\text{F}$  NMR (376 MHz,  $\text{CDCl}_3$ ) ( $\delta$ , ppm) -96.7 (d,  $J = 310.5$  Hz, 1F), -98.8 (d,  $J = 310.7$  Hz, 1F); HRMS (TOF MS ESI<sup>+</sup>) calculated for  $\text{C}_{19}\text{H}_{10}\text{BrF}_2\text{N}_3\text{O}_2\text{Na}$   $[\text{M}+\text{Na}]^+$ : 451.9822, found 451.9823; HPLC conditions for determination of enantiomeric excess: Chiralpak AD-H,  $\lambda = 254$  nm, hexane : 2-propanol = 80:20, flow rate = 1.0 mL/min,  $t_{\text{major}} = 13.6$  min,  $t_{\text{minor}} = 23.7$  min.

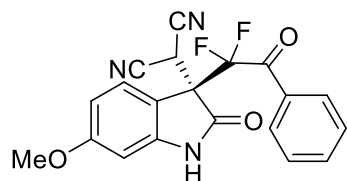

**(R)-2-(3-(1,1-Difluoro-2-oxo-2-phenylethyl)-6-methoxy-2-oxoindolin-3-**

**yl)malononitrile (4h).** Pale yellow solid. mp = 121 - 123 °C, 34.3 mg, 90% yield. 94% *ee*.  $[\alpha]_D^{20} = +3.5$  (c = 0.5, MeOH);  $^1\text{H NMR}$  (400 MHz,  $\text{CDCl}_3$ ) ( $\delta$ , ppm) 8.89 – 8.67 (m, 1H), 8.05 – 7.90 (m, 2H), 7.68 – 7.60 (m, 1H), 7.58 – 7.52 (m, 1H), 7.50 – 7.42 (m, 2H), 6.69 – 6.52 (m, 2H), 4.92 (s, 1H), 3.78 (s, 3H);  $^{13}\text{C NMR}$  (126 MHz,  $\text{CDCl}_3$ ) ( $\delta$ , ppm) 185.7 (t,  $J = 30.4$  Hz), 171.4 (d,  $J = 7.3$  Hz), 162.8, 143.4, 135.5, 130.7, 130.5 (d,  $J = 3.5$  Hz), 129.0, 126.9 (d,  $J = 3.1$  Hz), 117.0 (dd,  $J = 271.7, 267.6$  Hz), 112.3 (d,  $J = 3.7$  Hz), 110.0, 109.2, 108.9, 98.7, 55.7, 55.4 (d,  $J = 20.4$  Hz), 27.2 (d,  $J = 8.2$  Hz);  $^{19}\text{F NMR}$  (376 MHz,  $\text{CDCl}_3$ ) ( $\delta$ , ppm) -97.2 (d,  $J = 308.2$  Hz, 1F), -98.5 (d,  $J = 308.0$  Hz, 1F); HRMS (TOF MS  $\text{ESI}^+$ ) calculated for  $\text{C}_{20}\text{H}_{13}\text{F}_2\text{N}_3\text{O}_3\text{Na}$   $[\text{M}+\text{Na}]^+$ : 404.0823, found 404.0822; HPLC conditions for determination of enantiomeric excess: Chiralpak IG-3,  $\lambda = 254$  nm, hexane : 2-propanol = 80:20, flow rate = 1.0 mL/min,  $t_{\text{major}} = 20.5$  min,  $t_{\text{minor}} = 15.3$  min.

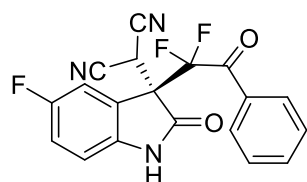

**(R)-2-(3-(1,1-Difluoro-2-oxo-2-phenylethyl)-5-fluoro-2-oxoindolin-3-**

**yl)malononitrile (4i).** Pale yellow solid. mp = 156 - 158 °C, 35.1 mg, 95% yield. 96% *ee*.  $[\alpha]_D^{20} = +5.3$  (c = 0.5, MeOH);  $^1\text{H NMR}$  (400 MHz,  $\text{CDCl}_3$ ) ( $\delta$ , ppm) 8.57 (s, 1H), 8.04 – 7.98 (m, 2H), 7.72 – 7.63 (m, 1H), 7.53 – 7.45 (m, 2H), 7.45 – 7.39 (m, 1H), 7.20 – 7.11 (m, 1H), 7.05 – 6.97 (m, 1H), 4.92 (s, 1H);  $^{13}\text{C NMR}$  (126 MHz,  $\text{CDCl}_3$ ) ( $\delta$ , ppm) 185.1 (t,  $J = 30.4$  Hz), 170.7 (d,  $J = 8.0$  Hz), 147.9, 144.1, 136.2, 130.6 (t,  $J = 3.1$  Hz), 129.3, 128.8, 122.0 (d,  $J = 4.0$  Hz), 121.8 (d,  $J = 4.1$  Hz), 117.2 (dd,  $J = 274.7, 268.8$  Hz), 111.7, 109.1, 108.6, 67.1, 55.3 (t,  $J = 20.5$  Hz), 26.8 (d,  $J =$

8.7 Hz);  $^{19}\text{F}$  NMR (376 MHz,  $\text{CDCl}_3$ ) ( $\delta$ , ppm) -96.8 (d,  $J = 311.5$  Hz, 1F), -98.8 (d,  $J = 311.4$  Hz, 1F), -116.9 (s, 1F); HRMS (TOF MS  $\text{ESI}^+$ ) calculated for  $\text{C}_{19}\text{H}_{10}\text{F}_3\text{N}_3\text{O}_2\text{Na}$   $[\text{M}+\text{Na}]^+$ : 392.0623, found 392.0618; HPLC conditions for determination of enantiomeric excess: Chiralpak AD-H,  $\lambda = 254$  nm, hexane : 2-propanol = 80:20, flow rate = 1.0 mL/min,  $t_{\text{major}} = 15.2$  min,  $t_{\text{minor}} = 18.6$  min.

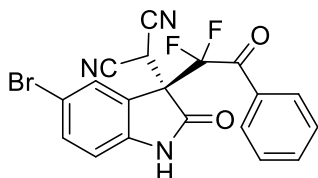

**(R)-2-(5-Bromo-3-(1,1-difluoro-2-oxo-2-phenylethyl)-2-oxoindolin-3-**

**yl)malononitrile (4j).** Pale yellow solid. mp = 188 - 189 °C, 38.6 mg, 90% yield. 96% *ee*.  $[\alpha]_{\text{D}}^{20} = +13.5$  ( $c = 0.5$ , MeOH);  $^1\text{H}$  NMR (500 MHz,  $\text{CDCl}_3$ ) ( $\delta$ , ppm) 8.80 – 8.56 (m, 1H), 8.08 – 7.94 (m, 2H), 7.76 (s, 1H), 7.73 – 7.63 (m, 1H), 7.58 – 7.52 (m, 1H), 7.53 – 7.46 (m, 2H), 6.98 – 6.91 (m, 1H), 4.92 (s, 1H);  $^{13}\text{C}$  NMR (126 MHz,  $\text{CDCl}_3$ ) ( $\delta$ , ppm) 185.3 (t,  $J = 30.6$  Hz), 170.2 (d,  $J = 7.5$  Hz), 141.0, 135.9, 135.1, 130.6, 130.3 (t,  $J = 3.4$  Hz), 129.2, 128.9 (d,  $J = 3.9$  Hz), 122.9 (d,  $J = 3.7$  Hz), 117.1 (dd,  $J = 273.3, 268.3$  Hz), 116.6, 113.0 (d,  $J = 2.5$  Hz), 109.4, 108.7, 55.6 (t,  $J = 20.3$  Hz), 27.0 (d,  $J = 8.3$  Hz);  $^{19}\text{F}$  NMR (376 MHz,  $\text{CDCl}_3$ ) ( $\delta$ , ppm) -96.4 (d,  $J = 312.4$  Hz, 1F), -98.6 (d,  $J = 312.3$  Hz, 1F); HRMS (TOF MS  $\text{ESI}^+$ ) calculated for  $\text{C}_{19}\text{H}_{10}\text{BrF}_2\text{N}_3\text{O}_2\text{Na}$   $[\text{M}+\text{Na}]^+$ : 451.9822, found 451.9817; HPLC conditions for determination of enantiomeric excess: Chiralpak AD-H,  $\lambda = 254$  nm, hexane : 2-propanol = 80:20, flow rate = 1.0 mL/min,  $t_{\text{major}} = 15.8$  min,  $t_{\text{minor}} = 20.3$  min.

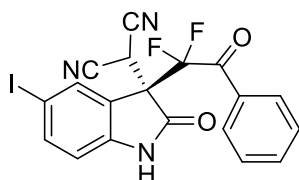

**(R)-2-(3-(1,1-Difluoro-2-oxo-2-phenylethyl)-5-iodo-2-oxoindolin-3-**

**yl)malononitrile (4k).** Pale yellow solid. mp = 202 - 205 °C, 43.4 mg, 91% yield.

97% *ee*.  $[\alpha]_D^{20} = +19.3$  ( $c = 0.5$ , MeOH);  $^1\text{H NMR}$  (400 MHz,  $\text{CDCl}_3$ ) ( $\delta$ , ppm) 8.69 (s, 1H), 8.05 – 7.98 (m, 2H), 7.91 (s, 1H), 7.79 – 7.72 (m, 1H), 7.72 – 7.64 (m, 1H), 7.54 – 7.46 (m, 2H), 6.87 – 6.80 (m, 1H), 4.90 (s, 1H);  $^{13}\text{C NMR}$  (126 MHz,  $\text{CDCl}_3$ ) ( $\delta$ , ppm) 185.3 (t,  $J = 30.2$  Hz), 170.1 (d,  $J = 7.8$  Hz), 141.7, 141.1, 135.9, 134.3 (d,  $J = 4.1$  Hz), 130.6 (t,  $J = 3.1$  Hz), 130.3, 129.1, 123.2 (d,  $J = 3.7$  Hz), 117.1 (dd,  $J = 273.3, 268.2$  Hz), 113.5, 109.4, 108.7, 86.3, 55.4 (t,  $J = 20.3$  Hz), 27.0 (d,  $J = 8.3$  Hz);  $^{19}\text{F NMR}$  (376 MHz,  $\text{CDCl}_3$ ) ( $\delta$ , ppm) -96.4 (d,  $J = 311.9$  Hz, 1F), -98.6 (d,  $J = 311.7$  Hz, 1F); HRMS (TOF MS  $\text{ESI}^+$ ) calculated for  $\text{C}_{19}\text{H}_{10}\text{F}_2\text{N}_3\text{O}_2\text{Na}$   $[\text{M}+\text{Na}]^+$ : 499.9684, found 499.9681; HPLC conditions for determination of enantiomeric excess: Chiralpak IG-3,  $\lambda = 254$  nm, hexane : 2-propanol = 90:10, flow rate = 1.0 mL/min,  $t_{\text{major}} = 31.9$  min,  $t_{\text{minor}} = 26.4$  min.

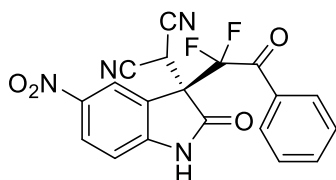

**(R)-2-(3-(1,1-Difluoro-2-oxo-2-phenylethyl)-5-nitro-2-oxoindolin-3-**

**yl)malononitrile (4l).** Pale yellow solid. mp = 189 - 191 °C, 35.6 mg, 90% yield. 96% *ee*.  $[\alpha]_D^{20} = +16.6$  ( $c = 0.5$ , MeOH);  $^1\text{H NMR}$  (500 MHz,  $\text{CDCl}_3$ ) ( $\delta$ , ppm) 8.90 (s, 1H), 8.51 (s, 1H), 8.44 – 8.38 (m, 1H), 8.04 – 7.99 (m, 2H), 7.73 – 7.67 (m, 1H), 7.54 – 7.47 (m, 2H), 7.25 – 7.20 (m, 1H), 4.94 (s, 1H);  $^{13}\text{C NMR}$  (101 MHz,  $\text{CDCl}_3$ ) ( $\delta$ , ppm) 185.2 (t,  $J = 30.1$  Hz), 170.3 (d,  $J = 8.0$  Hz), 147.6, 144.3, 136.3, 130.7, 129.9, 129.3, 128.8, 122.0 (d,  $J = 4.0$  Hz), 121.9, 117.2 (dd,  $J = 268.5, 269.4$  Hz), 111.5, 109.0, 108.5, 55.3 (t,  $J = 20.5$  Hz), 26.9 (d,  $J = 8.1$  Hz);  $^{19}\text{F NMR}$  (376 MHz,  $\text{CDCl}_3$ ) ( $\delta$ , ppm) -96.0 (d,  $J = 314.6$  Hz, 1F), -98.4 (d,  $J = 314.7$  Hz, 1F); HRMS (TOF MS  $\text{ESI}^+$ ) calculated for  $\text{C}_{19}\text{H}_{10}\text{F}_2\text{N}_4\text{O}_4\text{Na}$   $[\text{M}+\text{Na}]^+$ : 419.0568, found 419.0566; HPLC conditions for determination of enantiomeric excess: Chiralpak AD-H,  $\lambda = 254$  nm, hexane : 2-propanol = 70:30, flow rate = 1.0 mL/min,  $t_{\text{major}} = 10.0$  min,  $t_{\text{minor}} = 15.0$  min.



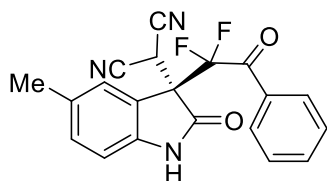

**(R)-2-(3-(1,1-Difluoro-2-oxo-2-phenylethyl)-5-methyl-2-oxoindolin-3-**

**yl)malononitrile (4m).** Pale yellow solid. mp = 178 - 180 °C, 32.8 mg, 90% yield. 95% *ee*.  $[\alpha]_D^{20} = +2.6$  (c = 0.5, MeOH);  $^1\text{H NMR}$  (500 MHz,  $\text{CDCl}_3$ ) ( $\delta$ , ppm) 8.62 (s, 1H), 8.05 – 7.97 (m, 2H), 7.70 – 7.62 (m, 1H), 7.54 – 7.41 (m, 3H), 7.25 – 7.19 (m, 1H), 6.96 – 6.90 (m, 1H), 4.93 (s, 1H), 2.34 (s, 3H);  $^{13}\text{C NMR}$  (101 MHz,  $\text{CDCl}_3$ ) ( $\delta$ , ppm) 185.7 (t,  $J = 30.6$  Hz), 170.7 (d,  $J = 7.6$  Hz), 139.4, 135.5, 133.9, 132.5 (d,  $J = 5.4$  Hz), 130.8 (t,  $J = 3.4$  Hz), 130.5, 129.0, 126.5 (t,  $J = 3.1$  Hz), 121.0 (d,  $J = 3.4$  Hz), 117.0 (dd,  $J = 272.1, 267.7$  Hz), 111.3 (d,  $J = 7.7$  Hz), 109.9, 109.0, 55.7 (t,  $J = 20.1$  Hz), 27.1, 21.3 (d,  $J = 8.6$  Hz);  $^{19}\text{F NMR}$  (376 MHz,  $\text{CDCl}_3$ ) ( $\delta$ , ppm) -96.9 (d,  $J = 309.7$  Hz, 1F), -98.6 (d,  $J = 309.4$  Hz, 1F); HRMS (TOF MS ESI<sup>+</sup>) calculated for  $\text{C}_{20}\text{H}_{13}\text{F}_2\text{N}_3\text{O}_2\text{Na}$   $[\text{M}+\text{Na}]^+$ : 388.0874, found 388.0874; HPLC conditions for determination of enantiomeric excess: Chiralpak IG-3,  $\lambda = 254$  nm, hexane : 2-propanol = 85:15, flow rate = 1.0 mL/min,  $t_{\text{major}} = 20.6$  min,  $t_{\text{minor}} = 17.4$  min.

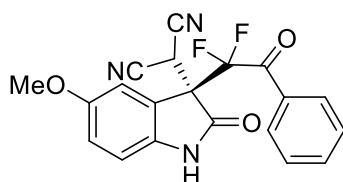

**(R)-2-(3-(1,1-Difluoro-2-oxo-2-phenylethyl)-5-methoxy-2-oxoindolin-3-**

**yl)malononitrile (4n).** Pale yellow solid. mp = 193 - 195 °C, 34.7 mg, 91% yield. 96% *ee*.  $[\alpha]_D^{20} = +4.3$  (c = 0.5, MeOH);  $^1\text{H NMR}$  (400 MHz,  $\text{CDCl}_3$ ) ( $\delta$ , ppm) 8.39 (s, 1H), 8.14 – 7.92 (m, 2H), 7.70 – 7.61 (m, 1H), 7.52 – 7.36 (m, 2H), 7.26 (s, 1H), 6.98 – 6.92 (m, 2H), 4.92 (s, 1H), 3.78 (s, 3H);  $^{13}\text{C NMR}$  (126 MHz,  $\text{CDCl}_3$ ) ( $\delta$ , ppm) 185.6 (t,  $J = 30.6$  Hz), 170.5 (d,  $J = 7.5$  Hz), 156.6, 135.6, 135.0, 130.7 (d,  $J = 3.3$  Hz), 130.5 (t,  $J = 3.2$  Hz), 129.0, 122.0 (d,  $J = 3.6$  Hz), 117.0 (dd,  $J = 267.8, 267.3$  Hz), 116.9, 112.7 (d,  $J = 3.4$  Hz), 112.1, 109.8, 109.0, 56.0 (d,  $J = 40.3$  Hz), 56.0, 27.1 (dd,

$J = 8.6, 2.7 \text{ Hz}$ );  $^{19}\text{F}$  NMR (376 MHz,  $\text{CDCl}_3$ ) ( $\delta$ , ppm) -96.9 (d,  $J = 309.7 \text{ Hz}$ , 1F), -98.6 (d,  $J = 309.4 \text{ Hz}$ , 1F); HRMS (TOF MS  $\text{ESI}^+$ ) calculated for  $\text{C}_{20}\text{H}_{13}\text{F}_2\text{N}_3\text{O}_3\text{Na}$   $[\text{M}+\text{Na}]^+$ : 404.0823, found 404.0817; HPLC conditions for determination of enantiomeric excess: Chiralpak AD-H,  $\lambda = 254 \text{ nm}$ , hexane : 2-propanol = 85:15, flow rate = 1.0 mL/min,  $t_{\text{major}} = 44.8 \text{ min}$ ,  $t_{\text{minor}} = 41.2 \text{ min}$ .

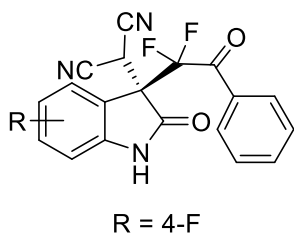

**(R)-2-(3-(1,1-Difluoro-2-oxo-2-phenylethyl)-4-fluoro-2-oxoindolin-3-**

**yl)malononitrile (4o).** Pale yellow solid. mp = 156 - 158 °C, 34.7 mg, 94% yield. 95% *ee*.  $[\alpha]_{\text{D}}^{20} = +7.7$  ( $c = 0.5$ , MeOH);  $^1\text{H}$  NMR (400 MHz,  $\text{CDCl}_3$ ) ( $\delta$ , ppm) 8.75 (s, 1H), 8.02 – 7.96 (m, 2H), 7.69 – 7.61 (m, 1H), 7.51 – 7.43 (m, 2H), 7.45 – 7.35 (m, 1H), 6.89 – 6.80 (m, 2H), 5.01 (s, 1H);  $^{13}\text{C}$  NMR (126 MHz,  $\text{CDCl}_3$ ) ( $\delta$ , ppm) 186.0 (t,  $J = 30.1 \text{ Hz}$ ), 169.7 (d,  $J = 7.5 \text{ Hz}$ ), 160.6, 158.6, 144.0 (d,  $J = 7.0 \text{ Hz}$ ), 135.6, 134.3 (d,  $J = 9.1 \text{ Hz}$ ), 130.7, 130.5, 129.1, 116.7 (t,  $J = 271.7 \text{ Hz}$ ), 111.9 (d,  $J = 21.5 \text{ Hz}$ ), 109.3, 108.9, 107.7 (d,  $J = 3.4 \text{ Hz}$ ), 56.8 (d,  $J = 21.2 \text{ Hz}$ ), 26.0 (d,  $J = 6.3 \text{ Hz}$ );  $^{19}\text{F}$  NMR (376 MHz,  $\text{CDCl}_3$ ) ( $\delta$ , ppm) -94.3 (dd,  $J = 304.3, 52.9 \text{ Hz}$ , 1F), -99.1 (dd,  $J = 304.0, 7.3 \text{ Hz}$ , 1F), -108.3 (s, 1F); HRMS (TOF MS  $\text{ESI}^+$ ) calculated for  $\text{C}_{19}\text{H}_{10}\text{F}_3\text{N}_3\text{O}_2\text{Na}$   $[\text{M}+\text{Na}]^+$ : 392.0623, found 392.0621; HPLC conditions for determination of enantiomeric excess: Chiralpak IG-3,  $\lambda = 254 \text{ nm}$ , hexane : 2-propanol = 90:10, flow rate = 1.0 mL/min,  $t_{\text{major}} = 32.3 \text{ min}$ ,  $t_{\text{minor}} = 28.8 \text{ min}$ .

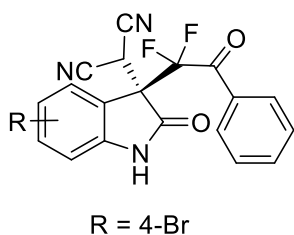

**(R)-2-(4-Bromo-3-(1,1-difluoro-2-oxo-2-phenylethyl)-2-oxoindolin-3-**

**yl)malononitrile (4p).** Pale yellow solid. mp = 190 - 192 °C, 38.6 mg, 90% yield. 96% *ee*.  $[\alpha]_D^{20} = +18.5$  (*c* = 0.5, MeOH);  $^1\text{H NMR}$  (500 MHz,  $\text{CDCl}_3$ ) ( $\delta$ , ppm) 9.03 (s, 1H), 7.91 – 7.84 (m, 2H), 7.64 – 7.57 (m, 1H), 7.45 – 7.38 (m, 2H), 7.24 – 7.18 (m, 2H), 7.05 – 6.99 (m, 1H), 5.51 (s, 1H);  $^{13}\text{C NMR}$  (126 MHz,  $\text{CDCl}_3$ ) ( $\delta$ , ppm) 186.2 (t,  $J = 28.1$  Hz), 168.8 (d,  $J = 7.1$  Hz), 144.5, 135.4, 133.5, 131.3 (d,  $J = 2.8$  Hz), 130.2 (t,  $J = 3.6$  Hz), 129.0, 128.9, 120.1 (d,  $J = 4.6$  Hz), 120.0, 116.5 (t,  $J = 273.8$  Hz), 111.0, 109.2, 108.7, 57.1 (d,  $J = 20.9$  Hz), 24.0 (d,  $J = 3.8$  Hz);  $^{19}\text{F NMR}$  (376 MHz,  $\text{CDCl}_3$ ) ( $\delta$ , ppm) -91.7 (d,  $J = 290.0$  Hz, 1F), -96.9 (d,  $J = 289.5$  Hz, 1F); HRMS (TOF MS ESI<sup>+</sup>) calculated for  $\text{C}_{19}\text{H}_{11}\text{BrF}_2\text{N}_3\text{O}_2$   $[\text{M}+\text{H}]^+$ : 430.0003, found 429.9994; HPLC conditions for determination of enantiomeric excess: Chiralpak IG-3,  $\lambda = 254$  nm, hexane : 2-propanol = 90:10, flow rate = 1.0 mL/min,  $t_{\text{major}} = 33.9$  min,  $t_{\text{minor}} = 26.9$  min.

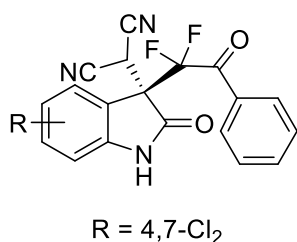

**(R)-2-(4,6-Dichloro-3-(1,1-difluoro-2-oxo-2-phenylethyl)-2-oxoindolin-3-**

**yl)malononitrile (4q).** Pale yellow solid. mp = 210 - 213 °C, 37.7 mg, 90% yield. 96% *ee*.  $[\alpha]_D^{20} = +15.3$  (*c* = 0.5, MeOH);  $^1\text{H NMR}$  (500 MHz,  $\text{CDCl}_3$ ) ( $\delta$ , ppm) 9.06 (s, 1H), 8.01 – 7.79 (m, 2H), 7.68 – 7.61 (m, 1H), 7.49 – 7.43 (m, 2H), 7.10 – 7.05 (m, 1H), 7.02 – 6.97 (m, 1H), 5.28 (s, 1H);  $^{13}\text{C NMR}$  (101 MHz,  $\text{CDCl}_3$ ) ( $\delta$ , ppm) 186.0 (t,  $J = 29.3$  Hz), 168.7 (d,  $J = 7.3$  Hz), 144.9, 139.0, 135.7, 133.0, 130.9 (d,  $J = 3.0$  Hz), 130.4, 129.1, 125.4 (d,  $J = 9.5$  Hz), 117.2 (dd,  $J = 219.7, 320.4$  Hz), 116.7, 111.0 (d,  $J = 10.7$  Hz), 109.2, 108.5, 56.8 (t,  $J = 21.9$  Hz), 24.6 (d,  $J = 12.1$  Hz);  $^{19}\text{F NMR}$  (376 MHz,  $\text{CDCl}_3$ ) ( $\delta$ , ppm) -91.9 (d,  $J = 297.5$  Hz, 1F), -97.1 (d,  $J = 297.2$  Hz, 1F); HRMS (TOF MS ESI<sup>+</sup>) calculated for  $\text{C}_{19}\text{H}_9\text{Cl}_2\text{F}_2\text{N}_3\text{O}_2\text{Na}$   $[\text{M}+\text{Na}]^+$ : 441.9938, found 441.9935; HPLC conditions for determination of enantiomeric excess: Chiralpak IG-3,  $\lambda = 254$  nm, hexane : 2-propanol = 85:15, flow rate = 1.0 mL/min,

$t_{\text{major}} = 10.5 \text{ min}$ ,  $t_{\text{minor}} = 8.8 \text{ min}$ .

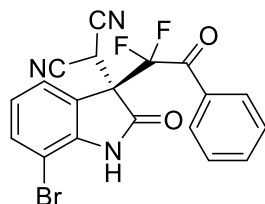

**(R)-2-(7-Bromo-3-(1,1-difluoro-2-oxo-2-phenylethyl)-2-oxoindolin-3-**

**yl)malononitrile (4r).** Pale yellow solid. mp = 192 - 194 °C, 39.5 mg, 92% yield. 94% *ee*.  $[\alpha]_{\text{D}}^{20} = +18.3$  ( $c = 0.5$ , MeOH);  $^1\text{H NMR}$  (400 MHz,  $\text{CDCl}_3$ ) ( $\delta$ , ppm) 8.18 (s, 1H), 8.05 – 7.97 (m, 2H), 7.72 – 7.63 (m, 1H), 7.65 – 7.55 (m, 2H), 7.53 – 7.45 (m, 2H), 7.11 – 7.02 (m, 1H), 4.91 (s, 1H);  $^{13}\text{C NMR}$  (101 MHz,  $\text{CDCl}_3$ ) ( $\delta$ , ppm) 185.4 (t,  $J = 30.1 \text{ Hz}$ ), 169.0 (d,  $J = 7.7 \text{ Hz}$ ), 141.5, 135.8, 134.9, 130.6, 130.5, 129.1, 125.2 (d,  $J = 8.0 \text{ Hz}$ ), 124.9 (d,  $J = 3.6 \text{ Hz}$ ), 122.0 (d,  $J = 3.8 \text{ Hz}$ ), 117.0 (dd,  $J = 268.2, 269.2 \text{ Hz}$ ), 109.5, 108.6, 104.3, 56.7 (t,  $J = 20.5 \text{ Hz}$ ), 27.0 (d,  $J = 8.6 \text{ Hz}$ );  $^{19}\text{F NMR}$  (376 MHz,  $\text{CDCl}_3$ ) ( $\delta$ , ppm) -96.8 (d,  $J = 310.9 \text{ Hz}$ , 1F), -98.8 (d,  $J = 310.9 \text{ Hz}$ , 1F); HRMS (TOF MS ESI<sup>+</sup>) calculated for  $\text{C}_{19}\text{H}_{11}\text{BrF}_2\text{N}_3\text{O}_2$   $[\text{M}+\text{H}]^+$ : 430.0003, found 430.0004; HPLC conditions for determination of enantiomeric excess: Chiralpak IG-3,  $\lambda = 254 \text{ nm}$ , hexane : 2-propanol = 85:15, flow rate = 1.0 mL/min,  $t_{\text{major}} = 26.3 \text{ min}$ ,  $t_{\text{minor}} = 17.7 \text{ min}$ .

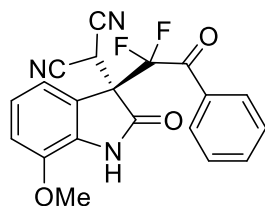

**(R)-2-(3-(1,1-Difluoro-2-oxo-2-phenylethyl)-7-methoxy-2-oxoindolin-3-**

**yl)malononitrile (4s).** Pale yellow solid. mp = 183 - 184 °C, 36.2 mg, 95% yield. 96% *ee*.  $[\alpha]_{\text{D}}^{20} = +3.7$  ( $c = 0.5$ , MeOH);  $^1\text{H NMR}$  (400 MHz,  $\text{CDCl}_3$ ) ( $\delta$ , ppm) 8.10 (s, 1H), 8.04 – 7.95 (m, 2H), 7.69 – 7.61 (m, 1H), 7.52 – 7.42 (m, 2H), 7.31 – 7.23 (m, 1H), 7.16 – 7.08 (m, 1H), 7.05 – 6.97 (m, 1H), 4.92 (s, 1H), 3.90 (s, 3H);  $^{13}\text{C NMR}$

(126 MHz, CDCl<sub>3</sub>) ( $\delta$ , ppm) 185.6 (t,  $J = 30.6$  Hz), 169.7 (d,  $J = 8.0$  Hz), 144.5, 135.5, 131.0, 130.8, 130.5 (t,  $J = 3.2$  Hz), 129.0, 124.7, 121.5 (d,  $J = 3.8$  Hz), 117.7 (d,  $J = 3.5$  Hz), 117.0 (dd,  $J = 267.6, 267.7$  Hz), 114.2, 109.9, 108.9, 56.3 (t,  $J = 20.2$  Hz), 55.9, 27.1 (dd,  $J = 8.7, 2.6$  Hz); <sup>19</sup>F NMR (376 MHz, CDCl<sub>3</sub>) ( $\delta$ , ppm) -96.9 (d,  $J = 308.5$  Hz, 1F), -98.99 (d,  $J = 309.0$  Hz, 1F); HRMS (TOF MS ESI<sup>+</sup>) calculated for C<sub>20</sub>H<sub>13</sub>F<sub>2</sub>N<sub>3</sub>O<sub>3</sub>Na [M+Na]<sup>+</sup>: 404.0823, found 404.0819; HPLC conditions for determination of enantiomeric excess: Chiralpak IG-3,  $\lambda = 254$  nm, hexane : 2-propanol = 80:20, flow rate = 1.0 mL/min,  $t_{\text{major}} = 36.5$  min,  $t_{\text{minor}} = 25.8$  min.

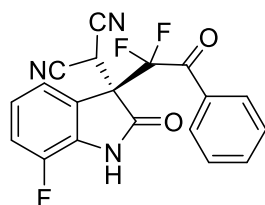

**(R)-2-(3-(1,1-Difluoro-2-oxo-2-phenylethyl)-7-fluoro-2-oxoindolin-3-**

**yl)malononitrile (4t).** Pale yellow solid. mp = 161 - 164 °C, 33.2 mg, 90% yield. 95% *ee*.  $[\alpha]_{\text{D}}^{20} = +5.8$  (c = 0.5, MeOH); <sup>1</sup>H NMR (400 MHz, CDCl<sub>3</sub>) ( $\delta$ , ppm) 8.43 (s, 1H), 8.04 – 7.98 (m, 2H), 7.72 – 7.63 (m, 1H), 7.53 – 7.45 (comp, 3H), 7.30 – 7.20 (m, 1H), 7.19 – 7.09 (m, 1H), 4.92 (s, 1H); <sup>13</sup>C NMR (101 MHz, CDCl<sub>3</sub>) ( $\delta$ , ppm) 185.3 (t,  $J = 30.6$  Hz), 169.6 (d,  $J = 7.8$  Hz), 148.7, 146.2, 135.8, 130.5 (t,  $J = 3.2$  Hz), 129.1, 124.9 (d,  $J = 6.2$  Hz), 123.3 (t,  $J = 3.7$  Hz), 121.7 (t,  $J = 3.7$  Hz), 119.5, 119.3, 117.0 (dd,  $J = 273.2, 268.3$  Hz), 109.6, 108.7, 56.0 (t,  $J = 20.4$  Hz), 27.0 (dd,  $J = 9.1, 2.5$  Hz); <sup>19</sup>F NMR (376 MHz, CDCl<sub>3</sub>) ( $\delta$ , ppm) -96.6 (d,  $J = 310.9$  Hz, 1F), -98.9 (d,  $J = 311.2$  Hz, 1F), -130.8 (s, 1F); HRMS (TOF MS ESI<sup>+</sup>) calculated for C<sub>19</sub>H<sub>10</sub>F<sub>3</sub>N<sub>3</sub>O<sub>2</sub>Na [M+Na]<sup>+</sup>: 392.0623, found 392.0625; HPLC conditions for determination of enantiomeric excess: Chiralpak IG-3,  $\lambda = 254$  nm, hexane : 2-propanol = 90:10, flow rate = 1.0 mL/min,  $t_{\text{major}} = 34.4$  min,  $t_{\text{minor}} = 31.2$  min.

#### 4. Control Experiment

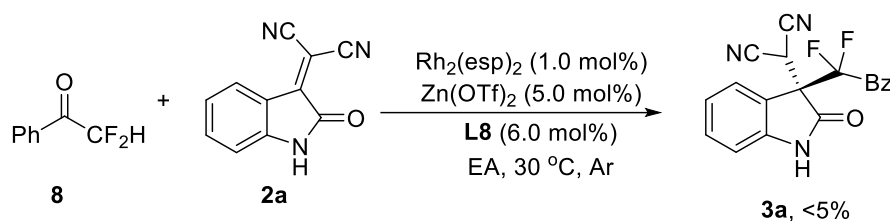

To a 10-mL oven-dried vial containing a magnetic stirring bar,  $\text{Rh}_2(\text{esp})_2$  (0.8 mg, 1.0 mol%),  $\text{Zn}(\text{OTf})_2$  (1.9 mg, 5.0 mol%) and **L8** (6.0 mol%) in Ethyl acetate (EA, 0.5 mL), was added a solution of **8** (15.6 mg, 0.1 mmol) in 0.5 mL EA and **2a** (19.5 mg, 0.1 mmol) in 1.0 mL EA *via* syringe in one pot under an argon atmosphere at 30 °C after 15 min, and the reaction mixture was stirred for an additional 3 h under these conditions until consumption of the material (monitored by TLC). The resulting reaction mixture was concentrated under reduced pressure and the residue was directly subjected to proton NMR analysis with  $\text{CDCl}_3$  as the solvent without any further purification. Most of the materials **8** and **2a** remained intact and no addition product **3a** was observed (Figure S1 below for details).

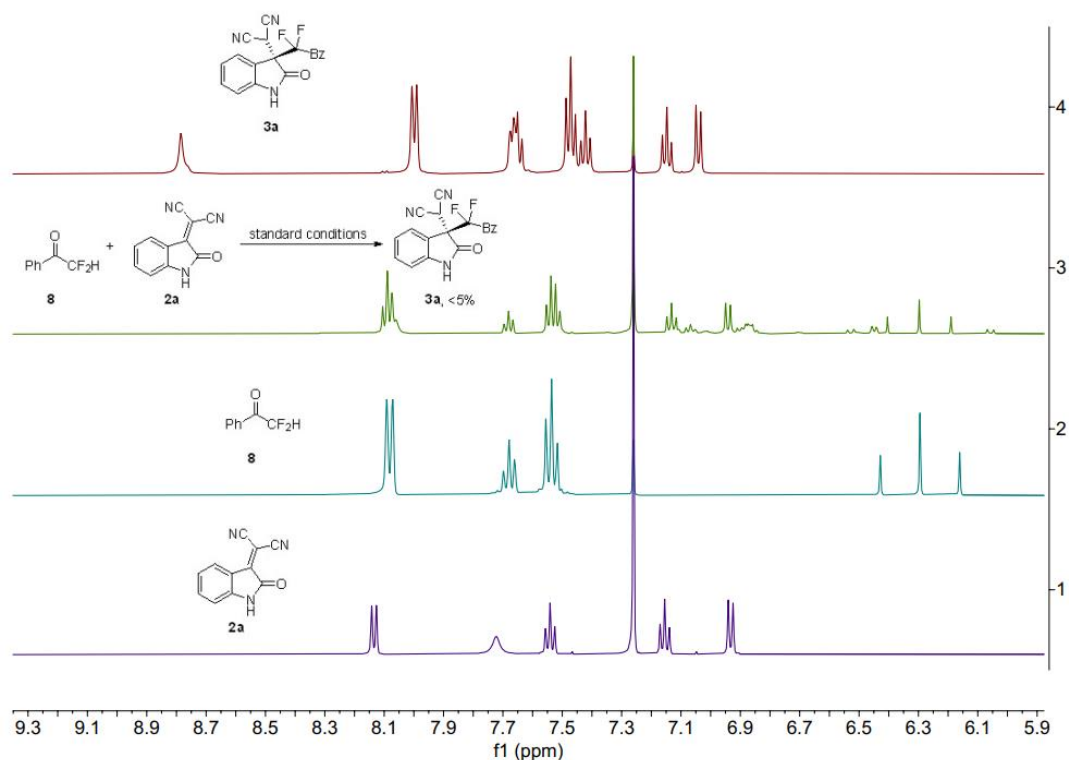

**Figure S1.** Proton NMR spectra of the crude reaction mixture of control experiment with **8** and **2a** under optimal conditions.

### 5. General Procedure for Scale Up and Synthetic Applications

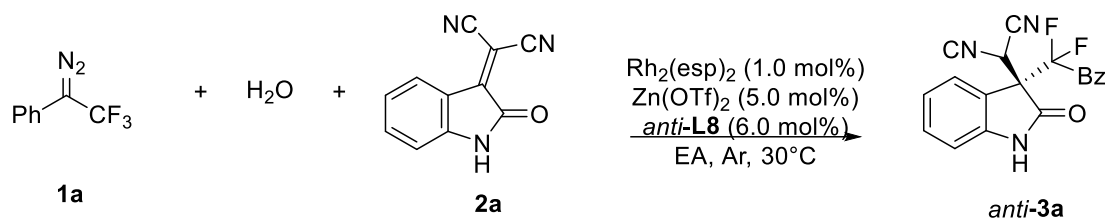

To a 100-mL oven-dried vial containing a magnetic stirring bar,  $\text{Rh}_2(\text{esp})_2$  (24.0 mg, 1.0 mol%),  $\text{H}_2\text{O}$  (81.0  $\mu\text{L}$ , 4.5 mmol),  $\text{Zn}(\text{OTf})_2$  (57.0 mg, 5.0 mol%) and *anti*-**L8** (6.0 mol%) in Ethyl acetate (EA, 15.0 mL), was added a solution of diazo compound **1a** (837.0 mg, 4.5 mmol) in 5.0 mL EA and **2a** (585.0 mg, 3.0 mmol) in 15.0 mL EA *via* syringe in one pot under an argon atmosphere at 30 °C after 15 min, and the reaction mixture was stirred for an additional 3 h under these conditions until consumption of the material (monitored by TLC). Then the reaction mixture was purified by column chromatography on silica gel without any additional treatment (Hexanes : EtOAc = 4:1 to 2:1) to give the 1.05 g pure products *anti*-**3a** in 95% yield with 93% *ee*. HPLC conditions for determination of enantiomeric excess: Chiralpak IG-3,  $\lambda = 254$  nm, hexane : 2-propanol = 85:15, flow rate = 1.0 mL/min,  $t_{\text{major}} = 15.7$  min,  $t_{\text{minor}} = 18.2$  min.

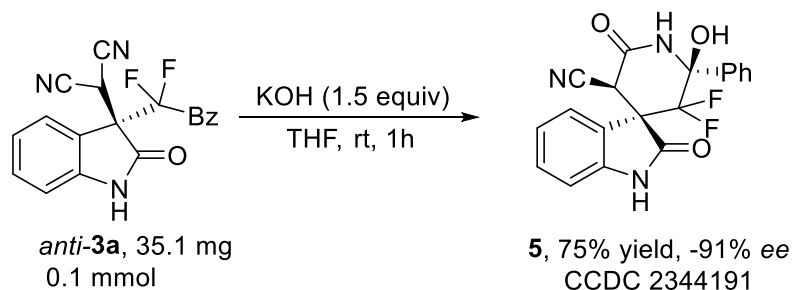

To a 10-mL oven-dried vial containing a magnetic stirring bar, *anti*-**3a** (35.1 mg, 0.1 mmol) in 1.0 mL THF, was added a solution of KOH (8.4 mg, 0.15 mmol) in water *via* syringe in one pot under an argon atmosphere at room temperature, and the

reaction mixture was stirred for an additional 1 h under these conditions until consumption of the material (monitored by TLC). Then the reaction mixture was extracted with ethyl acetate (5.0 mL  $\times$  4), the combined organic layer was dried over anhydrous Na<sub>2</sub>SO<sub>4</sub>, and concentrated under vacuum after filtration. The crude mixture was purified by silica gel column chromatography (using DCM as eluent) to give product **5** as white solid in 75% yield with 91% *ee*. <sup>1</sup>H NMR (400 MHz, DMSO-*d*<sub>6</sub>) ( $\delta$ , ppm) 10.93 (s, 1H), 10.20 (s, 1H), 9.92 (s, 1H), 7.83 – 7.63 (m, 2H), 7.58 – 7.43 (m, 3H), 7.37 – 7.29 (m, 1H), 7.17 – 7.10 (m, 1H), 7.08 – 7.00 (m, 1H), 6.98 – 6.92 (m, 1H), 3.18 (s, 1H); <sup>13</sup>C NMR (126 MHz, DMSO-*d*<sub>6</sub>) ( $\delta$ , ppm) 170.5 (d, *J* = 3.6 Hz), 168.8, 167.8, 142.7, 130.5, 130.4, 128.8, 128.5, 128.1, 126.6 (d, *J* = 3.6 Hz), 123.4 (d, *J* = 5.7 Hz), 122.2, 118.6 (dd, *J* = 268.0, 261.4 Hz), 110.8, 73.0 (t, *J* = 28.3 Hz), 60.2, 53.8 (t, *J* = 24.1 Hz); <sup>19</sup>F NMR (376 MHz, DMSO-*d*<sub>6</sub>)  $\delta$  -99.3 (d, *J* = 221.8 Hz, 1F), -108.2 (d, *J* = 221.4 Hz, 1F); HRMS (TOF MS ESI+) calculated for C<sub>19</sub>H<sub>14</sub>F<sub>2</sub>N<sub>3</sub>O<sub>3</sub> [M + H]<sup>+</sup>: 370.1005, found 370.1007; HPLC conditions for determination of enantiomeric excess: Chiralpak IG-3,  $\lambda$  = 254 nm, hexane : propanol = 80:20, flow rate = 1.0 mL/min, *t*<sub>major</sub> = 17.4 min, *t*<sub>minor</sub> = 25.3 min.

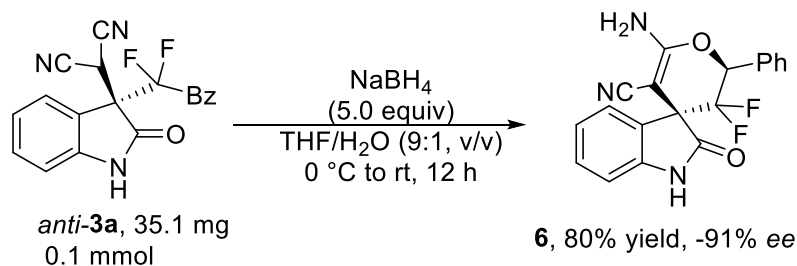

To a 10-mL oven-dried vial containing a magnetic stirring bar, *anti*-**3a** (35.1 mg, 0.1 mmol) in 2.0 mL mixture solvent of THF/H<sub>2</sub>O (9/1, v/v), was added NaBH<sub>4</sub> (18.9 mg, 5.0 mmol) at 0°C, and the reaction mixture was stirred for an additional 12 h under these conditions until consumption of the material (monitored by TLC). The reaction was quenched by adding 5.0 mL saturated NH<sub>4</sub>Cl (aq), which was kept stirring at room temperature till the generation of gas ceased. Then the reaction mixture was extracted with ethyl acetate (5.0 mL  $\times$  4), the combined organic layer was dried over anhydrous Na<sub>2</sub>SO<sub>4</sub>, and concentrated under vacuum after filtration. The crude mixture



was purified by silica gel column chromatography (using DCM as eluent) to give product **6** as white solid in 80% yield with 91% *ee*.  $^1\text{H}$  NMR (400 MHz,  $\text{DMSO-}d_6$ ) ( $\delta$ , ppm) 10.72 (s, 1H), 7.91 – 7.74 (m, 1H), 7.47 – 7.40 (m, 5H), 7.35 – 7.29 (m, 1H), 7.26 – 7.21 (m, 2H), 7.14 – 7.08 (m, 1H), 6.92 – 6.83 (m, 1H), 5.90 – 5.76 (m, 1H);  $^{13}\text{C}$  NMR (101 MHz,  $\text{DMSO-}d_6$ ) ( $\delta$ , ppm) 172.7, 164.5, 142.4, 130.3, 129.8, 129.7, 128.7, 128.3, 128.0, 127.9, 125.3, 122.3, 118.6 (d,  $J = 2.3$  Hz), 115.5 (dd,  $J = 262.0, 248.5$  Hz), 109.8, 75.5 (dd,  $J = 31.6, 22.5$  Hz), 53.3 (d,  $J = 6.0$  Hz);  $^{19}\text{F}$  NMR (376 MHz,  $\text{DMSO-}d_6$ )  $\delta$  -114.3 (d,  $J = 243.9$  Hz, 1F), -120.9 (d,  $J = 244.0$  Hz, 1F); HRMS (TOF MS ESI+) calculated for  $\text{C}_{19}\text{H}_{14}\text{F}_2\text{N}_3\text{O}_2$  [ $\text{M} + \text{H}$ ] $^+$ : 354.1056, found 354.1058; HPLC conditions for determination of enantiomeric excess: Chiralpak IG-3,  $\lambda = 254$  nm, hexane : propanol = 70:30, flow rate = 1.0 mL/min,  $t_{\text{major}} = 7.8$  min,  $t_{\text{minor}} = 12.7$  min.

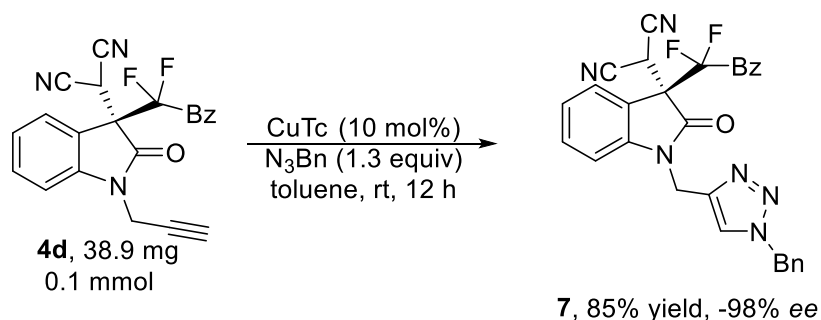

To a 10-mL oven-dried vial containing a magnetic stirring bar, CuTc (1.9 mg, 10 mol%), and **4d** (38.9 mg, 0.1 mmol) in toluene (0.5 mL), was added a solution of  $\text{N}_3\text{Bn}$  (17.3 mg, 0.13 mmol, 1.3 equiv.) in toluene (0.5 mL) dropwise at room temperature under a nitrogen atmosphere. After completion of the addition, the reaction mixture was stirred for additional 12 h under these conditions. When the reaction was completed (monitored by TLC), the solvent was removed under reduced pressure, yielding **7** in 85 % yields with 98% *ee* after separation by crystallization out in DCM.  $^1\text{H}$  NMR (400 MHz,  $\text{CDCl}_3$ ) ( $\delta$ , ppm) 7.91 – 7.84 (m, 2H), 7.68 – 7.61 (m, 3H), 7.49 – 7.41 (m, 3H), 7.36 – 7.28 (m, 3H), 7.25 – 7.18 (m, 3H), 7.17 – 7.11 (m, 1H), 5.47 (q,  $J = 14.9$  Hz, 2H), 5.15 (q,  $J = 15.8$  Hz, 2H), 4.88 (s, 1H);  $^{13}\text{C}$  NMR (126 MHz,  $\text{CDCl}_3$ ) ( $\delta$ , ppm) 185.4 (t,  $J = 30.7$  Hz), 168.9 (d,  $J = 8.1$  Hz), 143.5, 141.9,

135.6, 134.4, 132.3, 130.6, 130.4 (t,  $J = 3.3$  Hz), 129.2, 129.0, 128.9, 128.3, 125.7 (d,  $J = 3.6$  Hz), 124.2, 123.3, 120.0 (d,  $J = 3.5$  Hz), 117.0 (dd,  $J = 272.9, 267.4$  Hz), 111.2, 109.8, 109.0, 55.0 (d,  $J = 20.1$  Hz), 54.5, 36.8, 27.0 (d,  $J = 8.7$  Hz);  $^{19}\text{F}$  NMR (376 MHz,  $\text{CDCl}_3$ ) ( $\delta$ , ppm) -97.0 (d,  $J = 309.2$  Hz, 1F), -98.6 (d,  $J = 309.2$  Hz, 1F); HRMS (TOF MS  $\text{ESI}^+$ ) calculated for  $\text{C}_{29}\text{H}_{21}\text{F}_2\text{N}_6\text{O}_3$   $[\text{M}+\text{H}]^+$ : 523.1696, found 523.1699; HPLC conditions for determination of enantiomeric excess: Chiralpak AD-H,  $\lambda = 254$  nm, hexane : 2-propanol = 80:20, flow rate = 1.0 mL/min,  $t_{\text{major}} = 11.7$  min,  $t_{\text{minor}} = 16.2$  min.

## 6. NMR Spectra of New Compounds 3-6

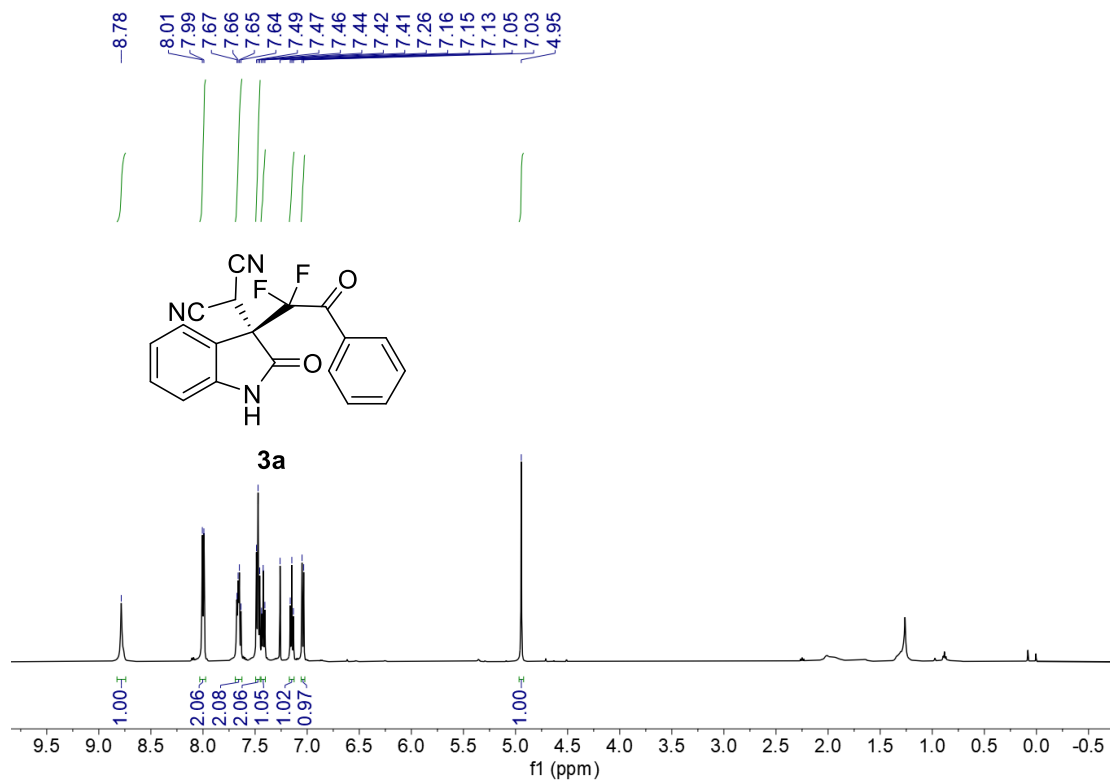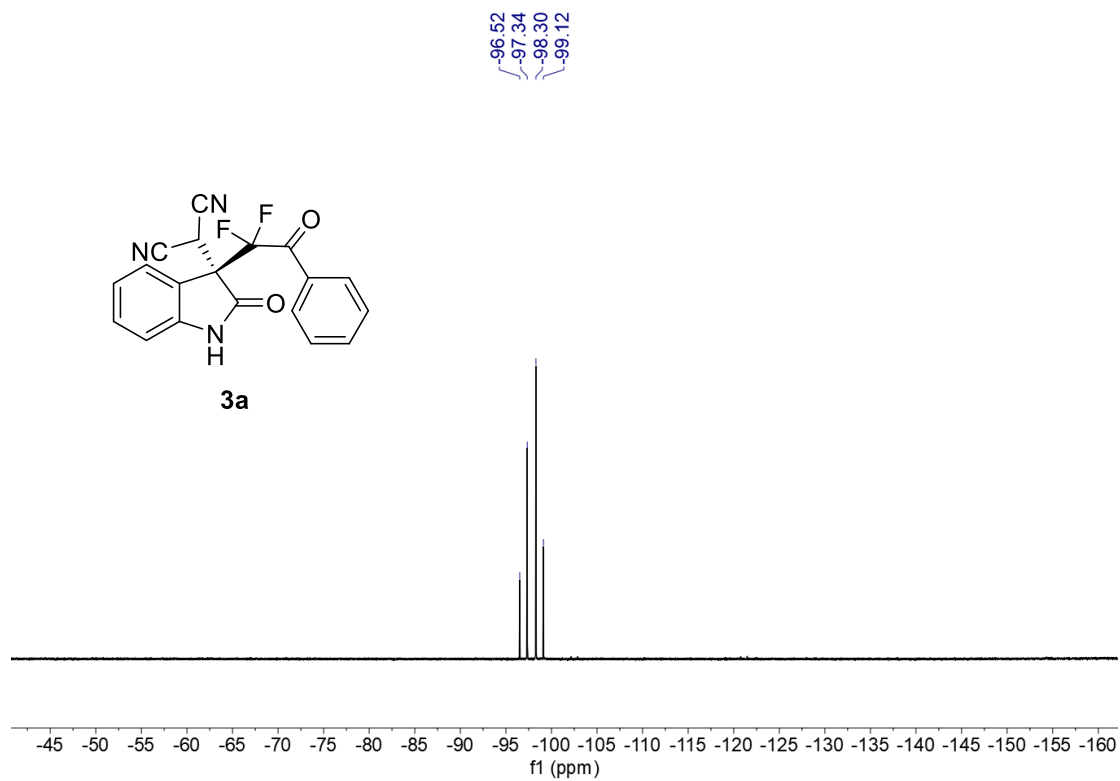

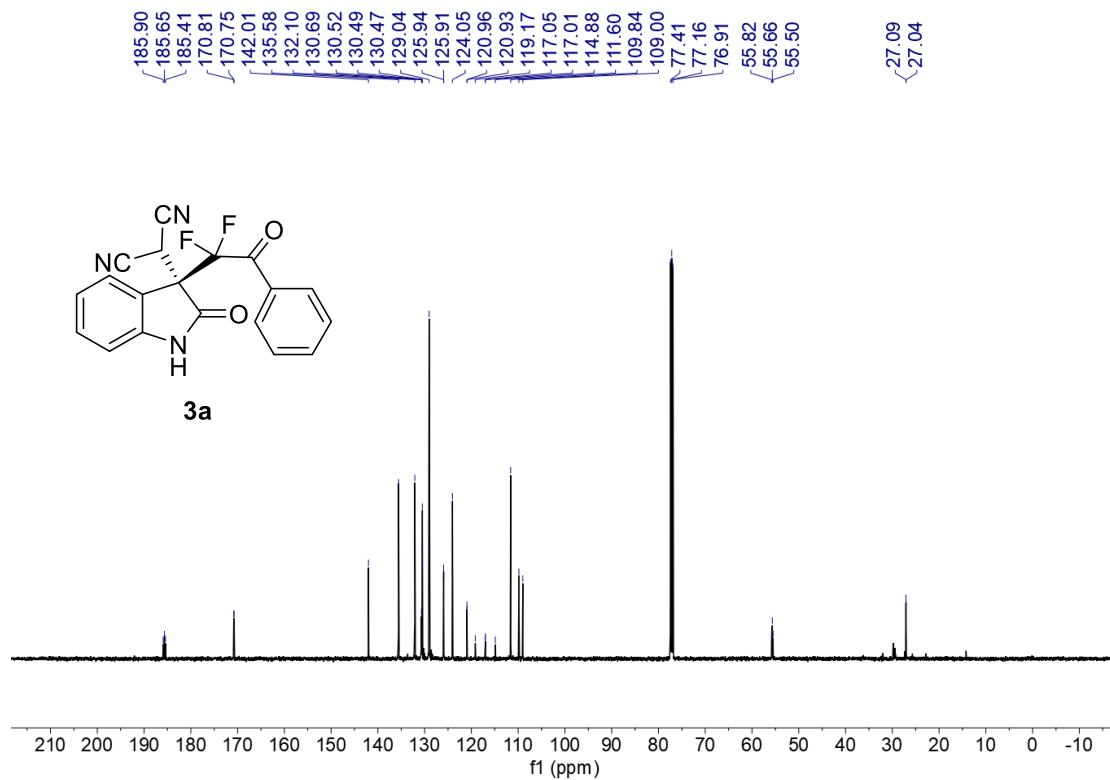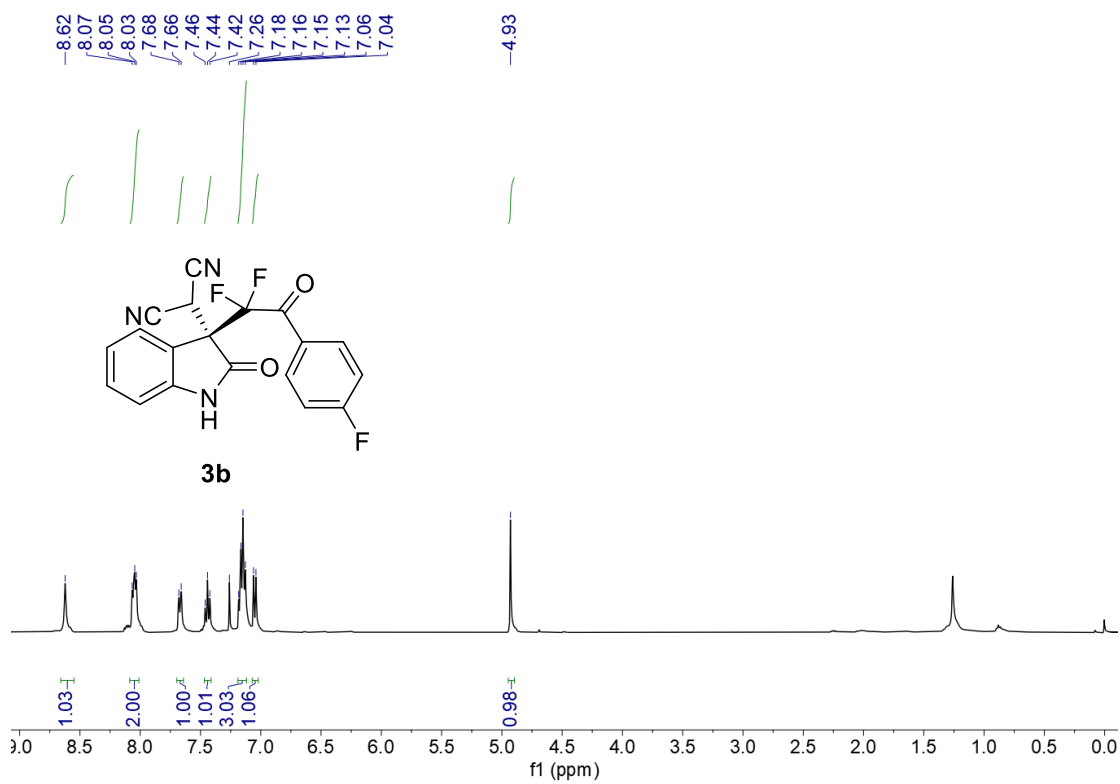

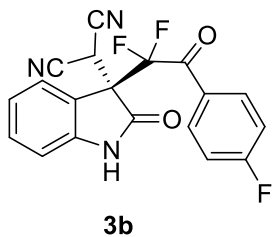

-96.44  
-97.26  
-98.18  
-99.00  
-99.49

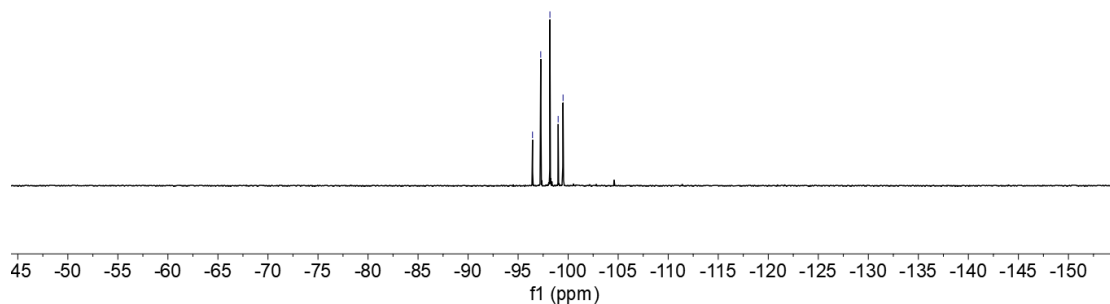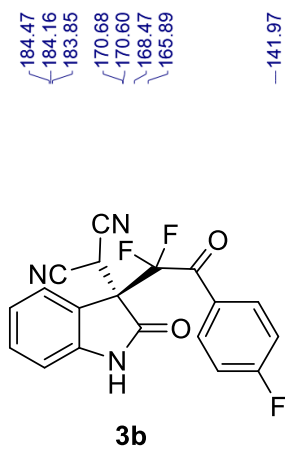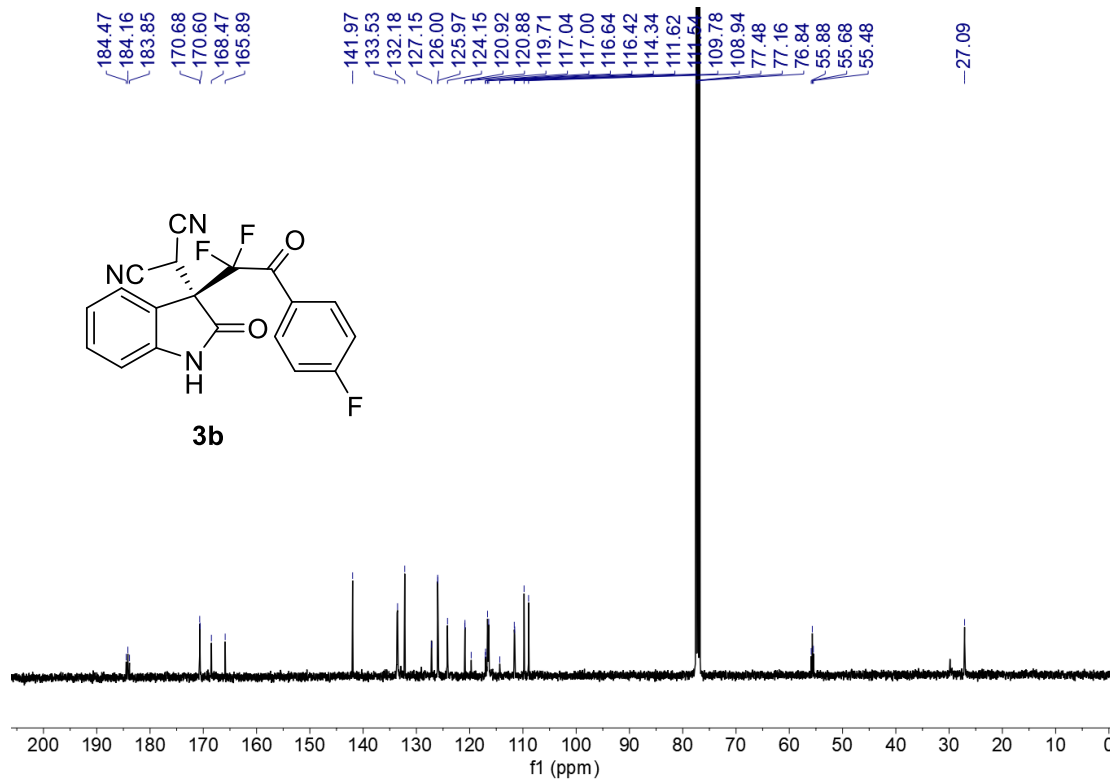

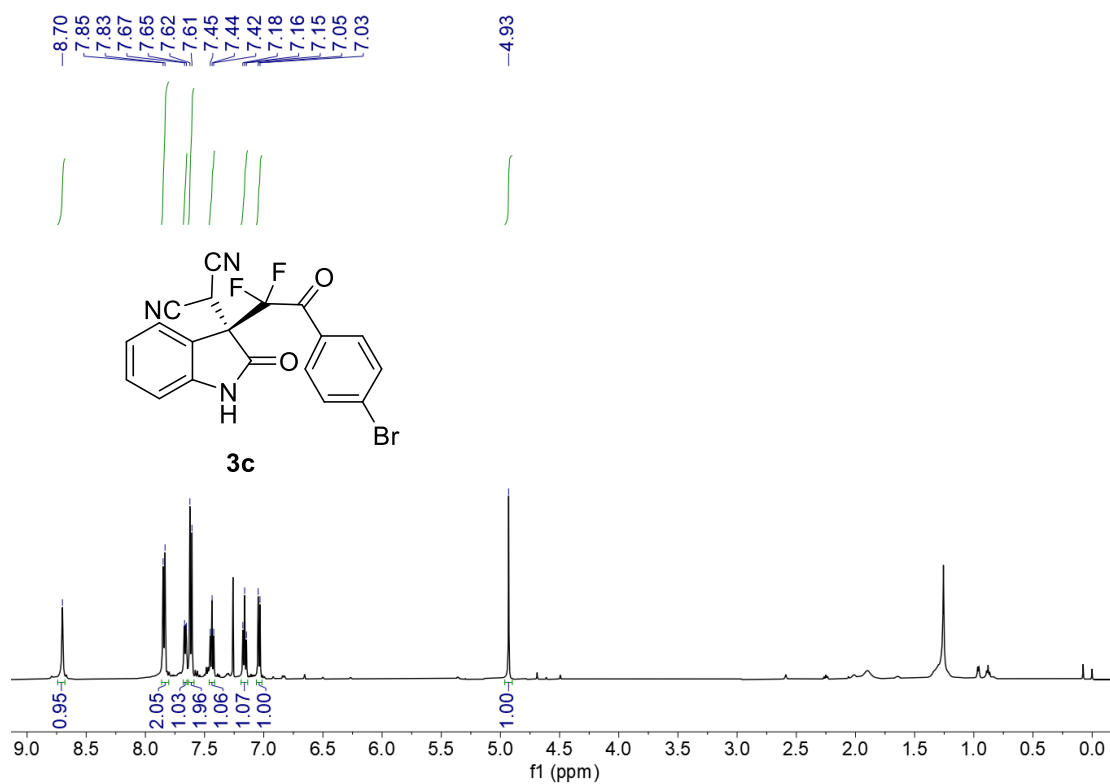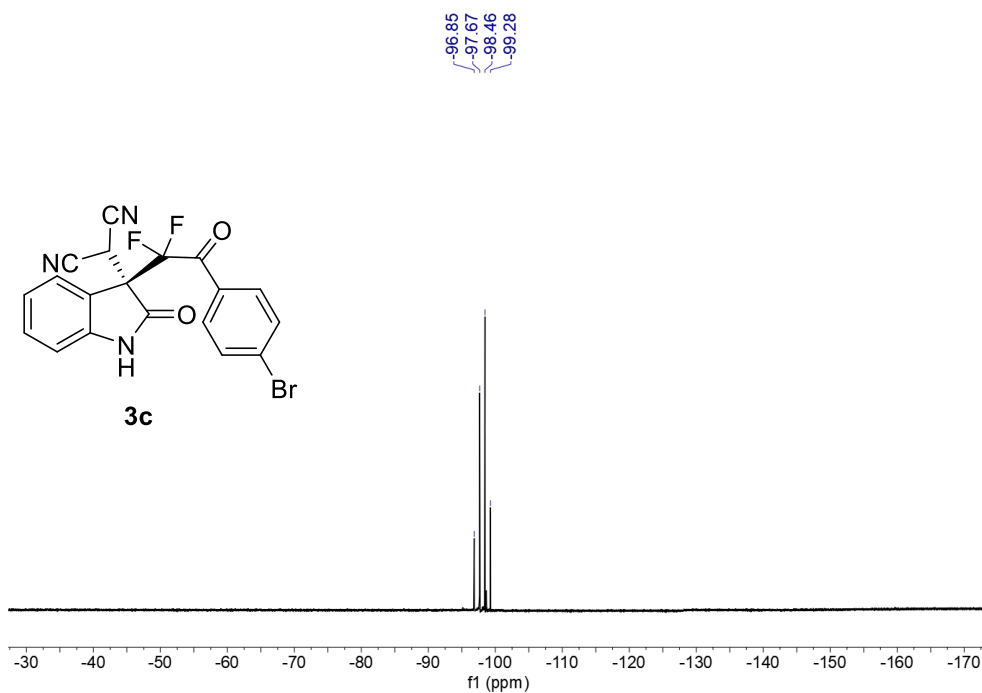

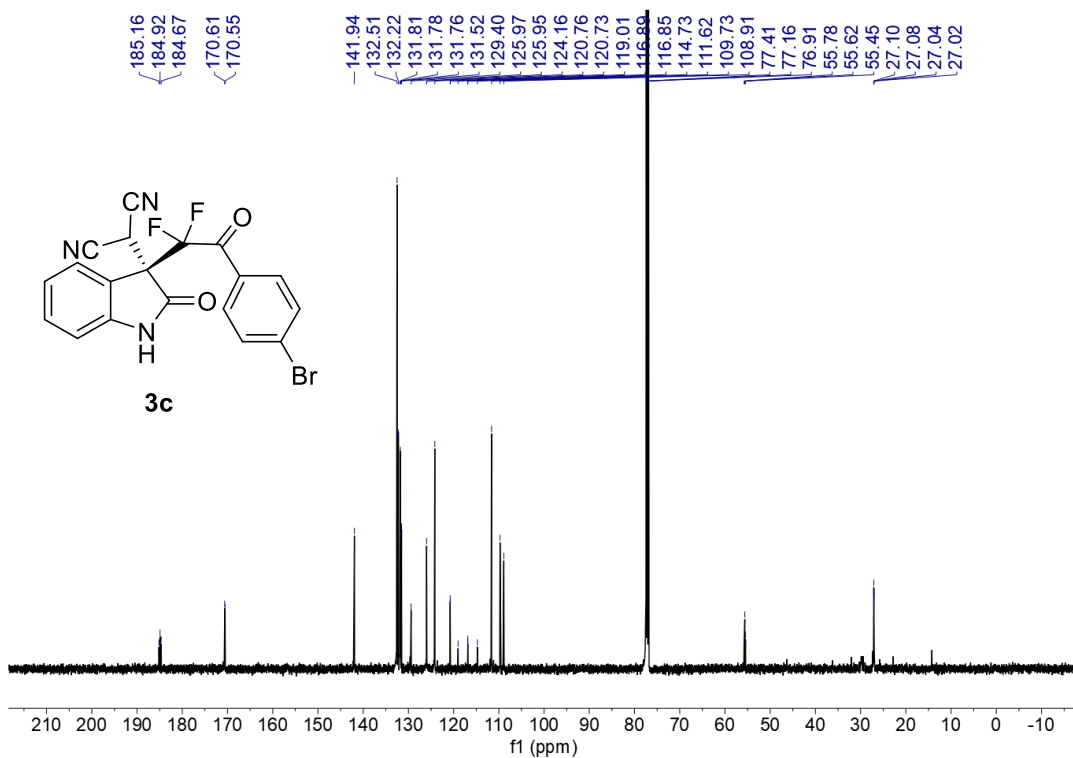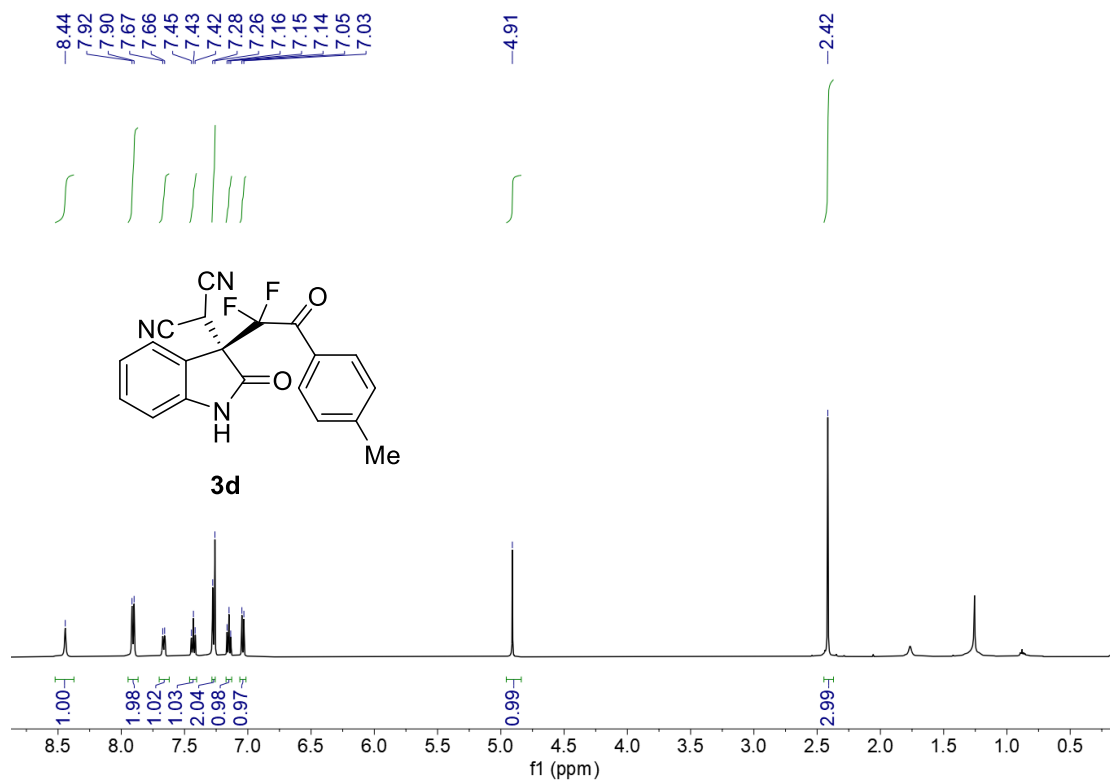

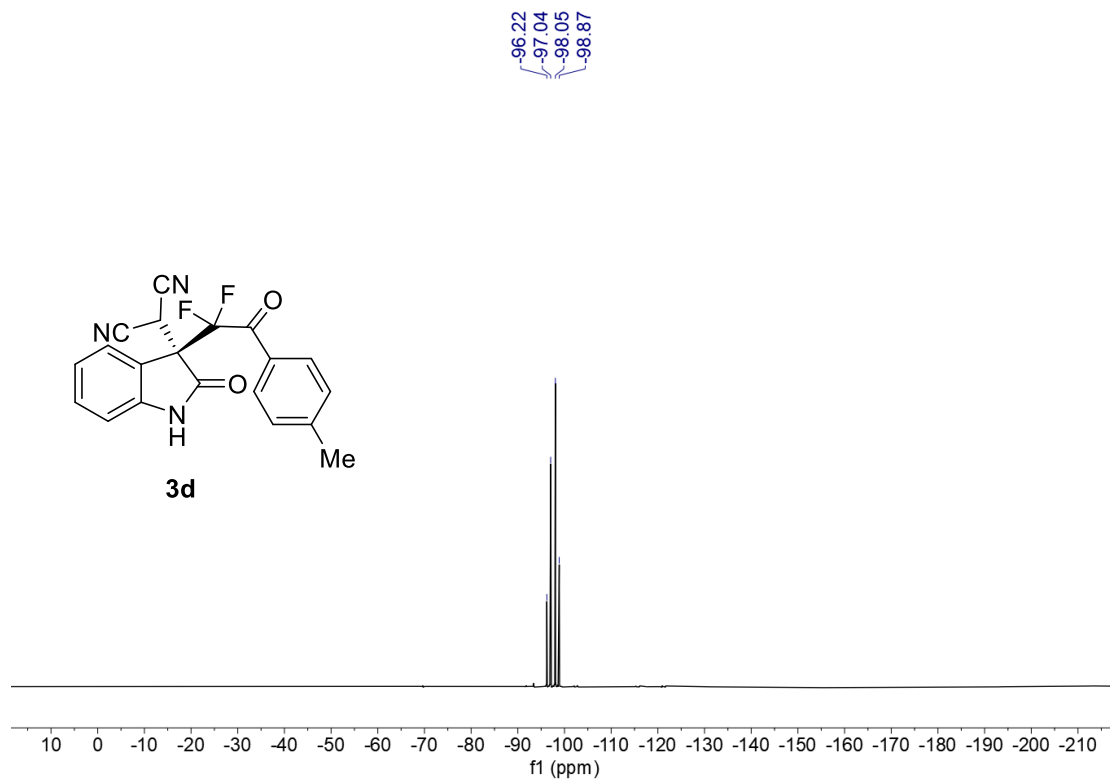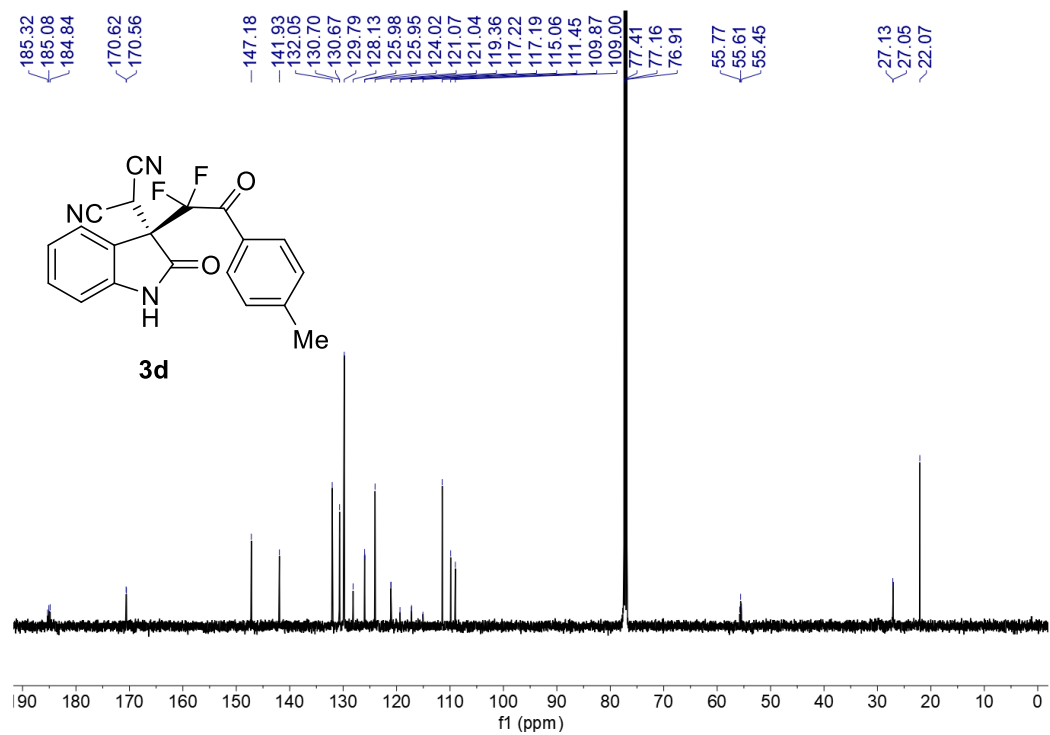



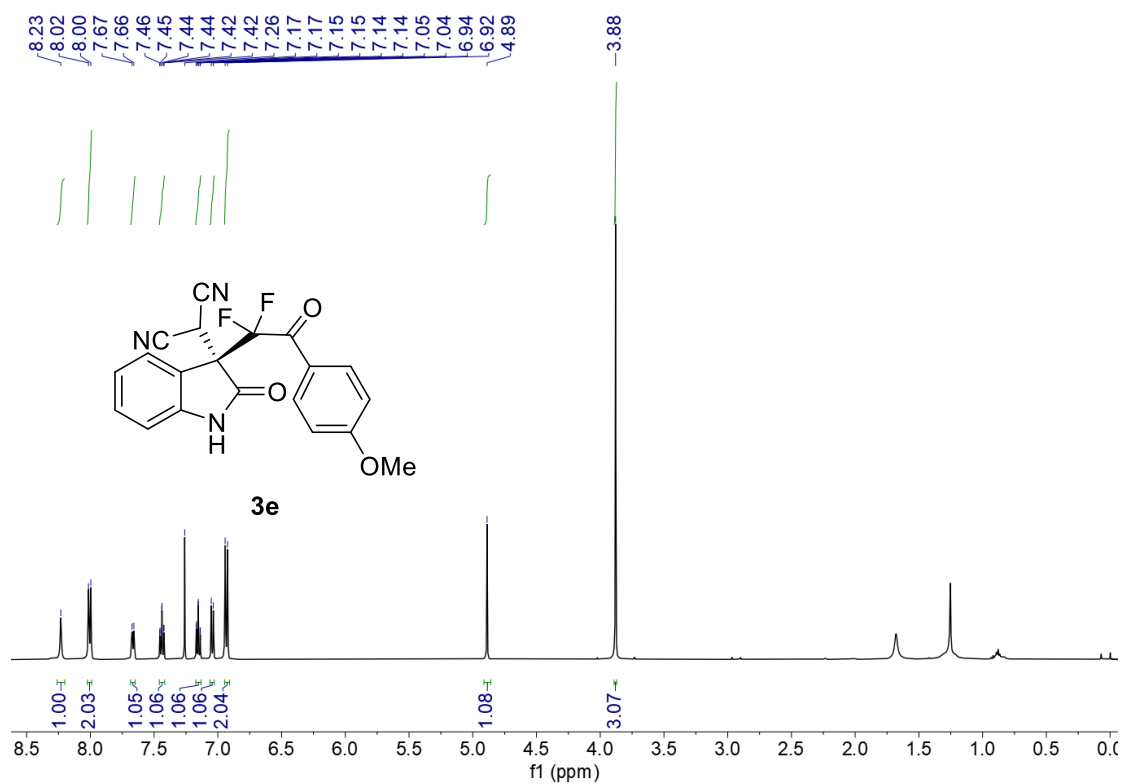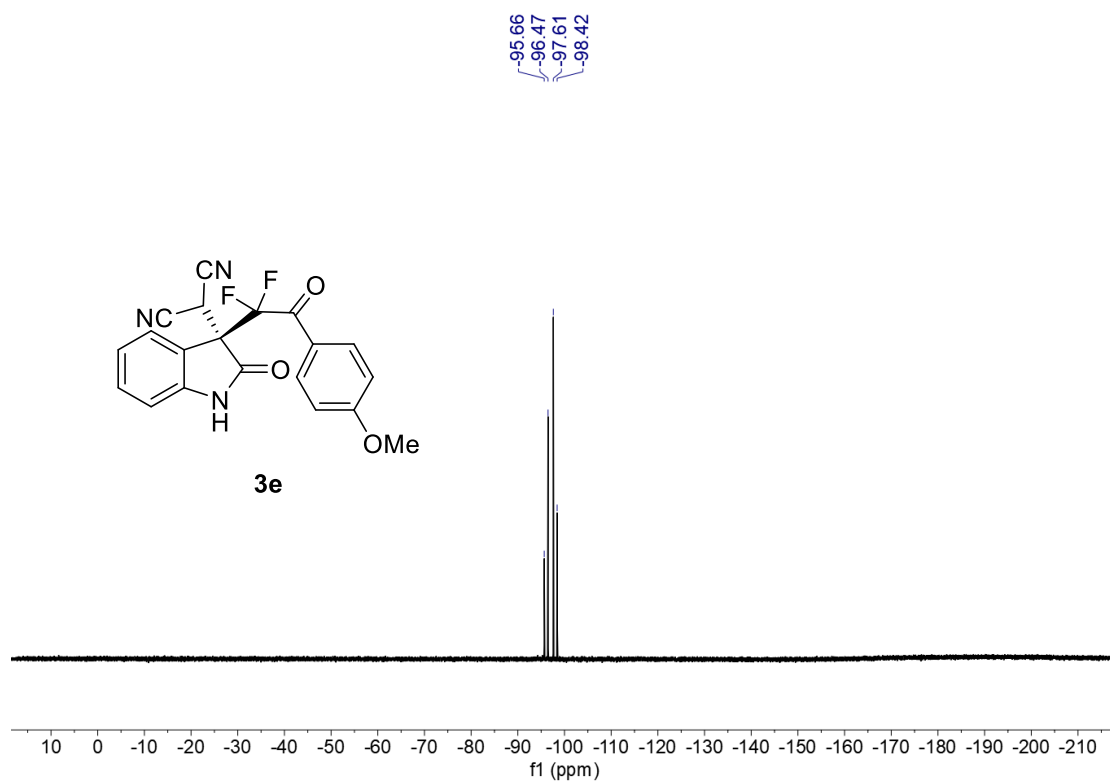

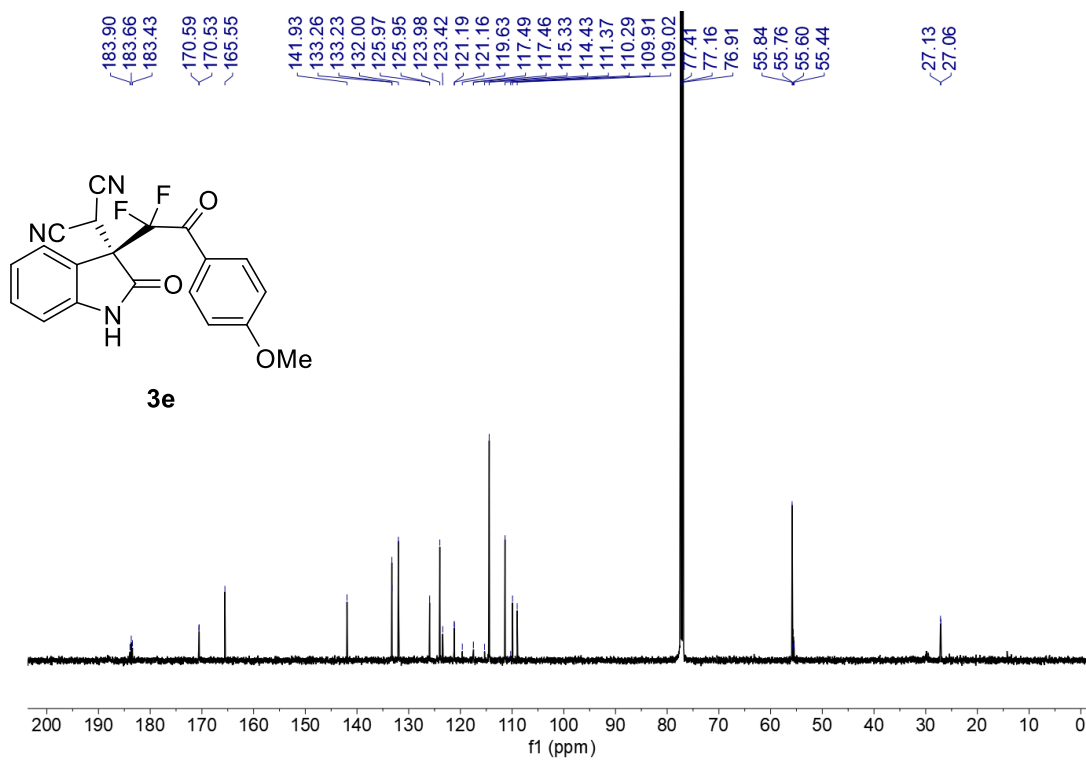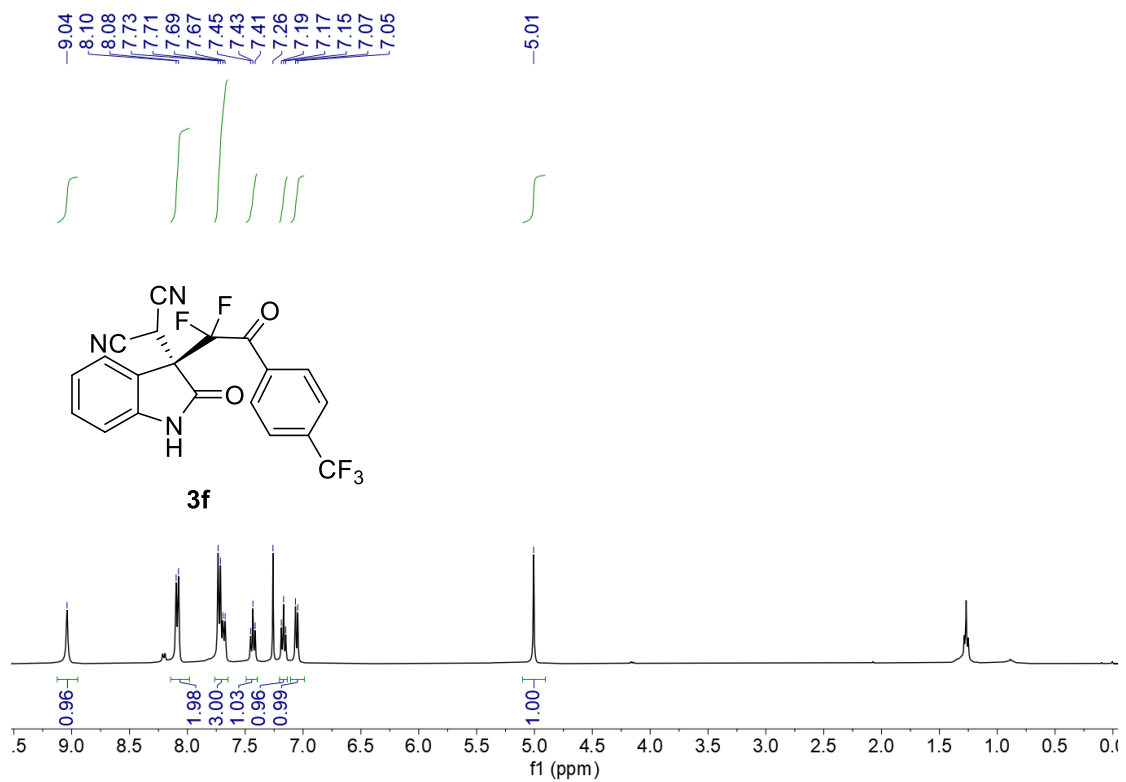

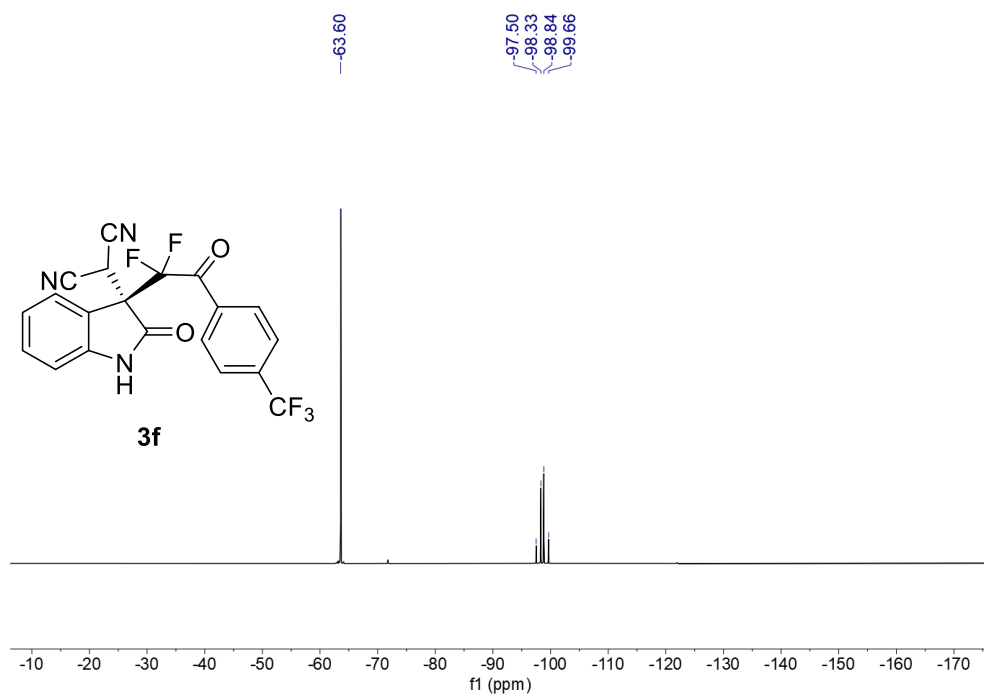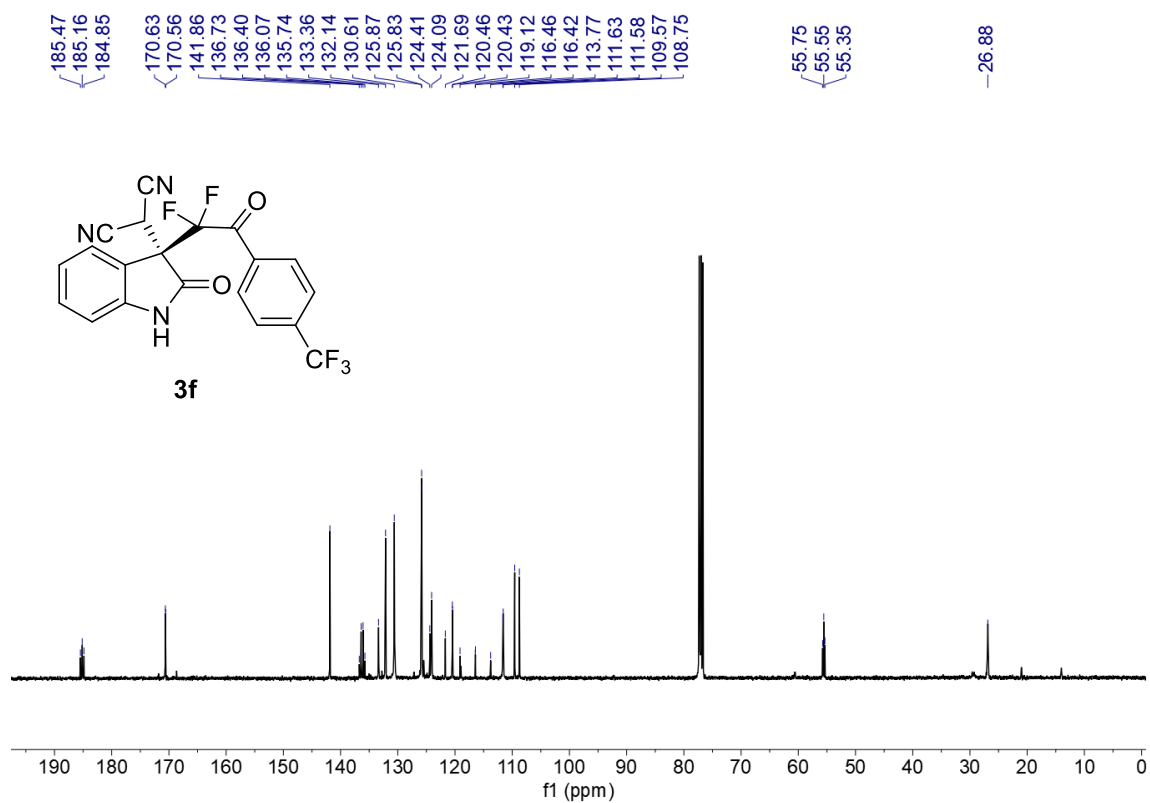

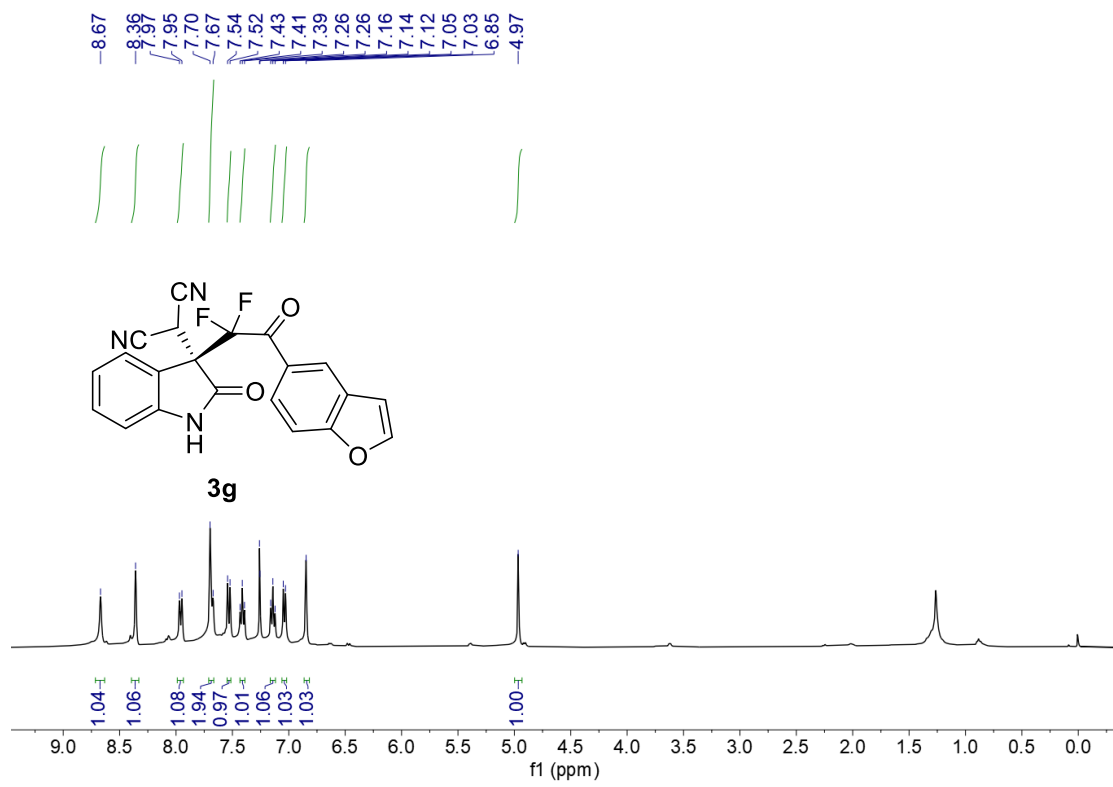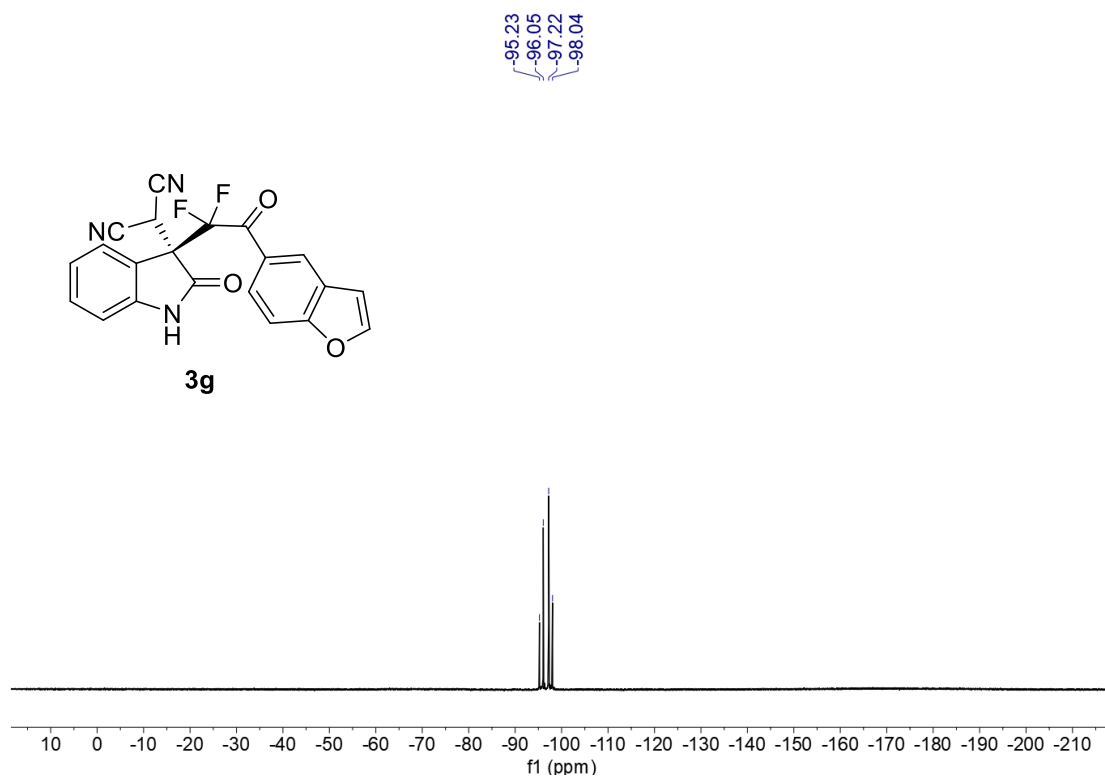

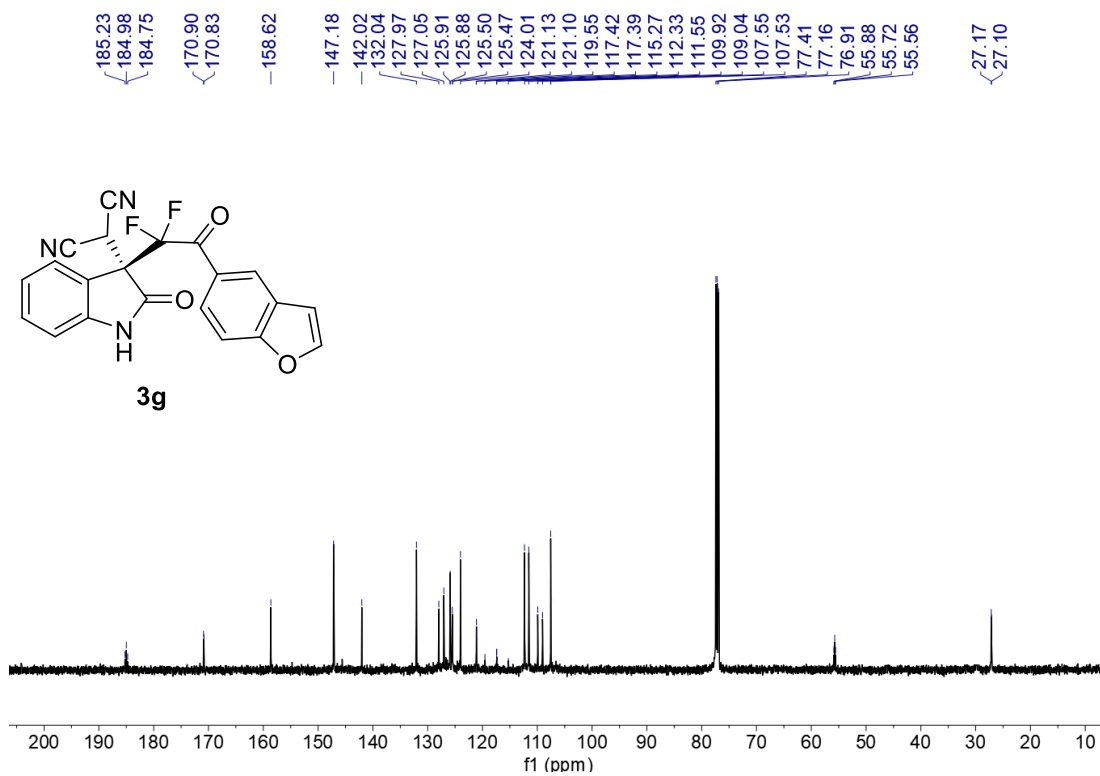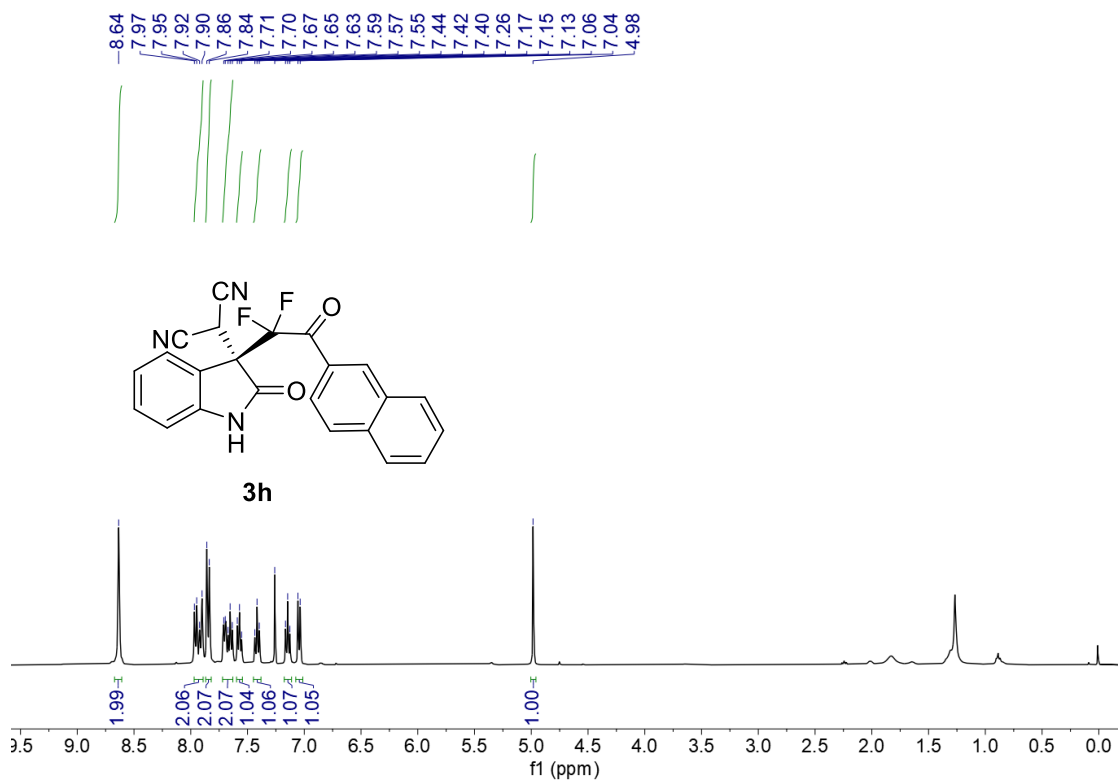

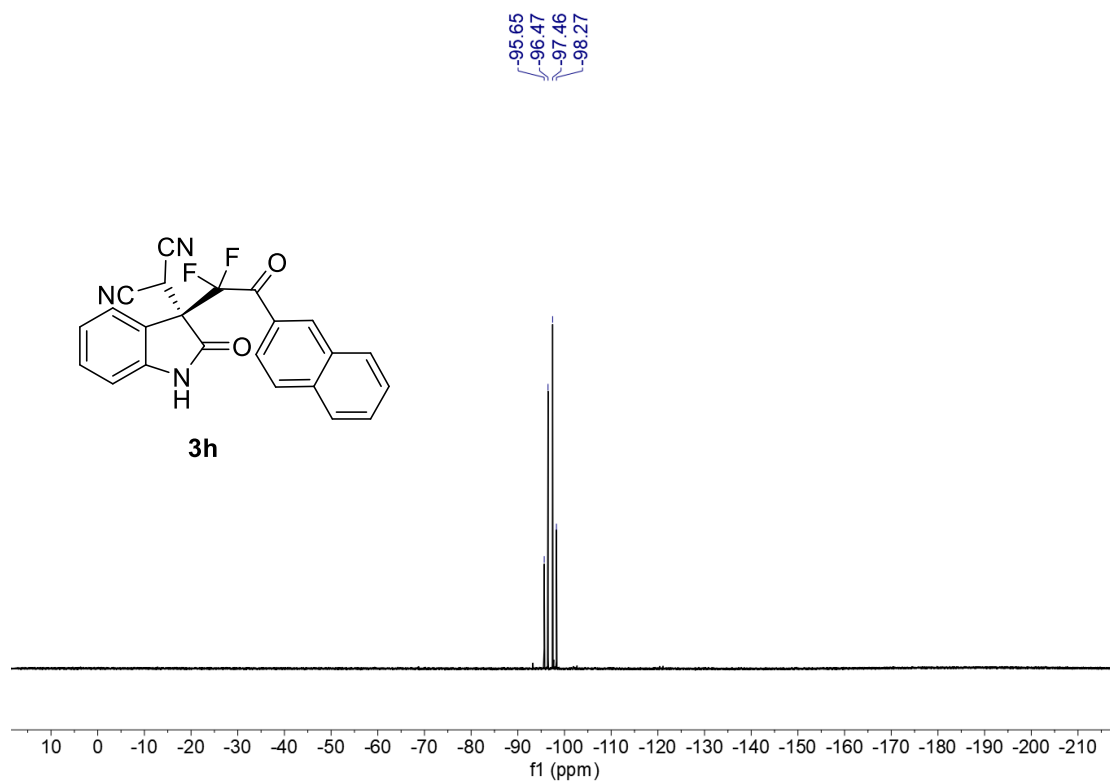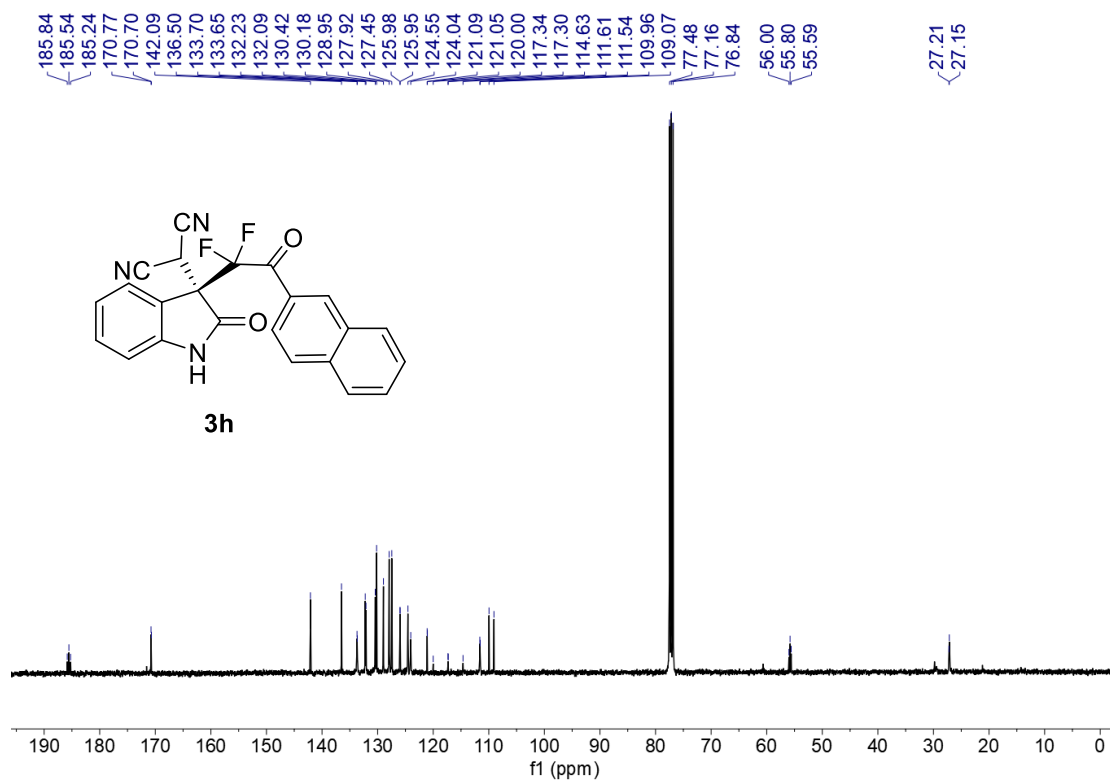

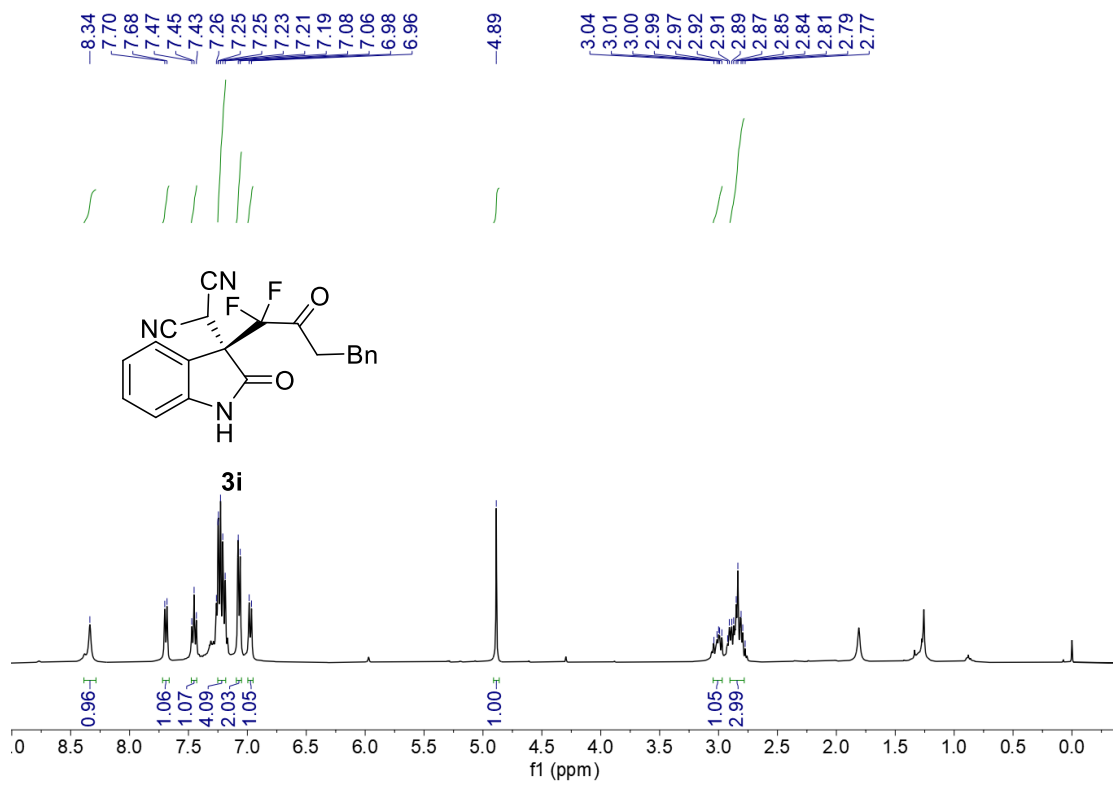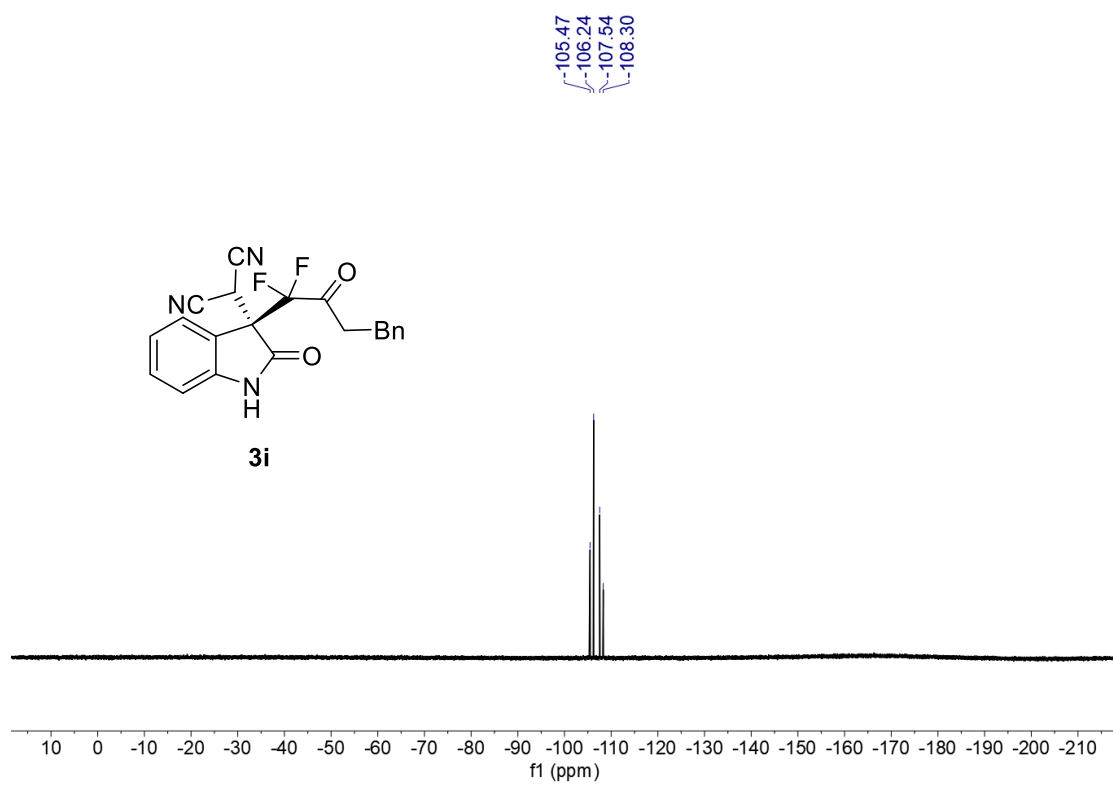

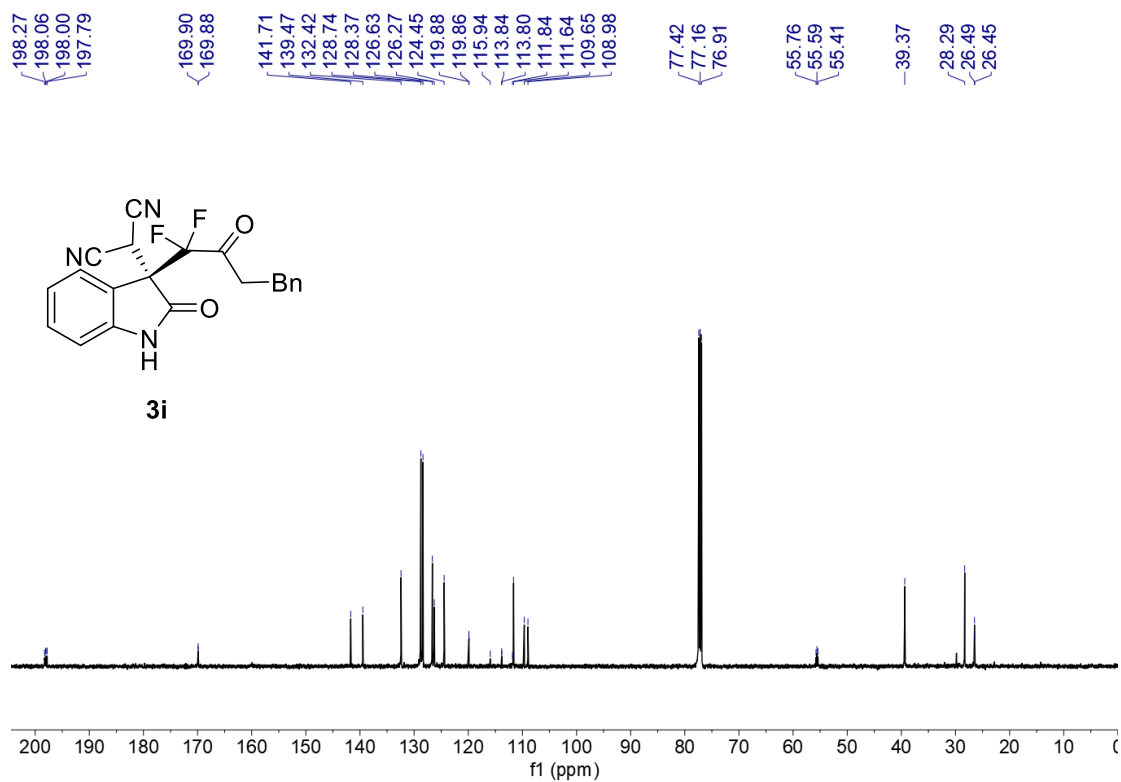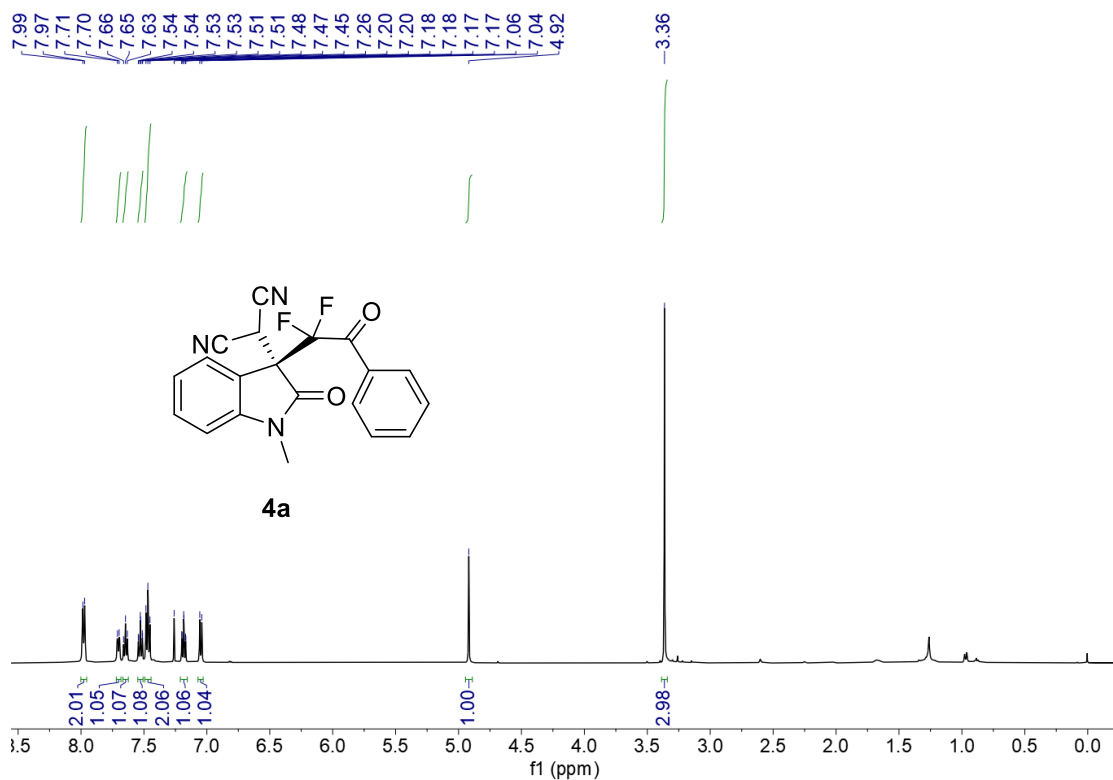



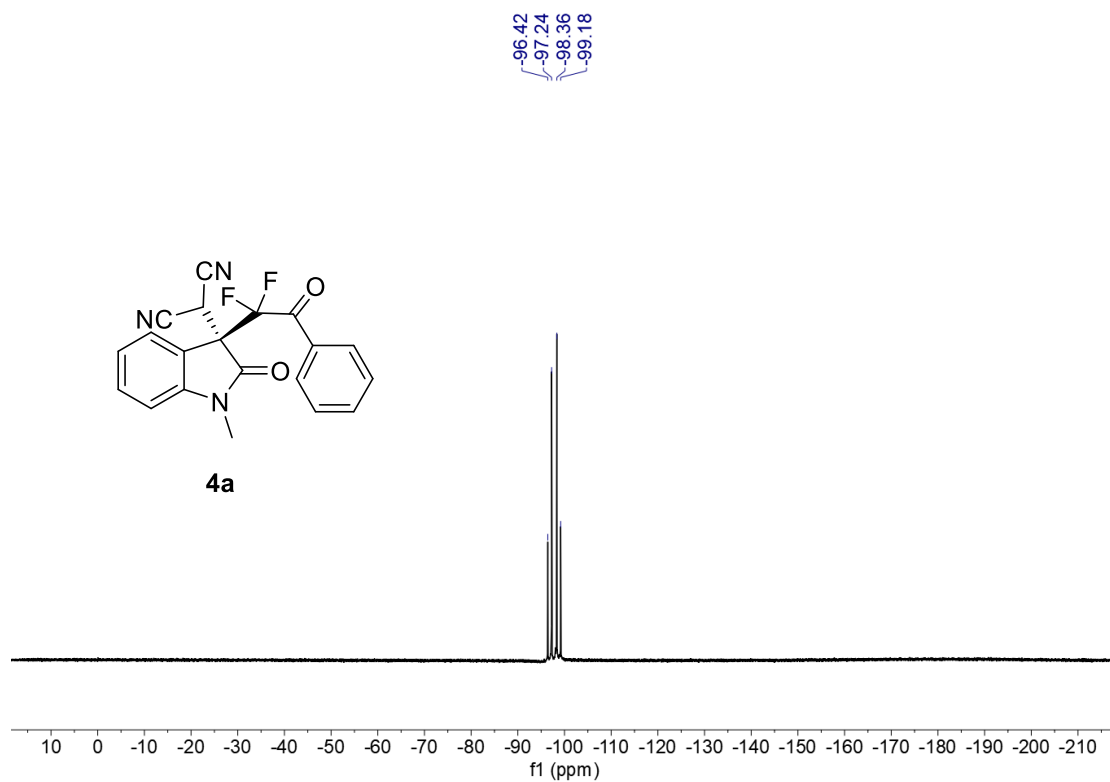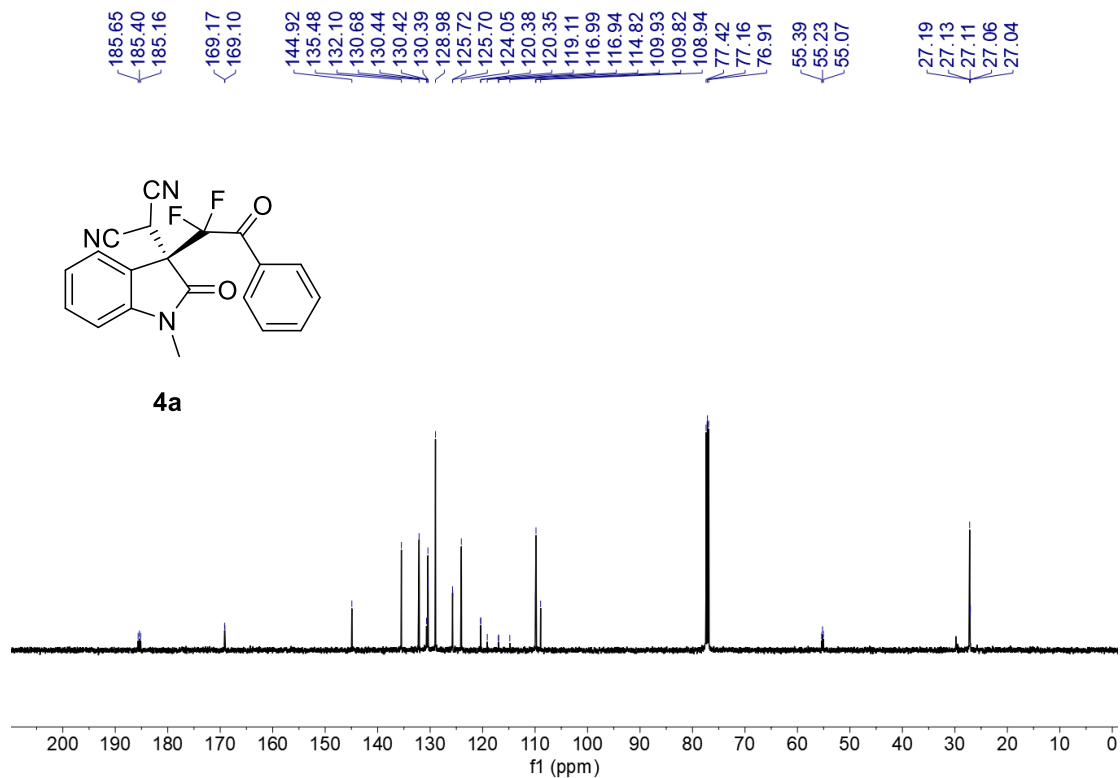

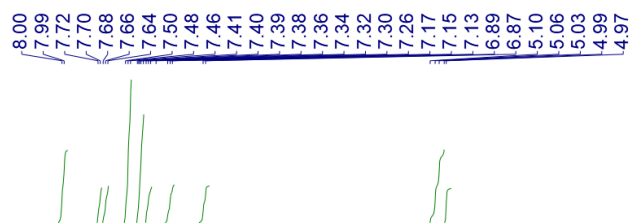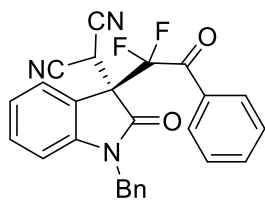

**4b**

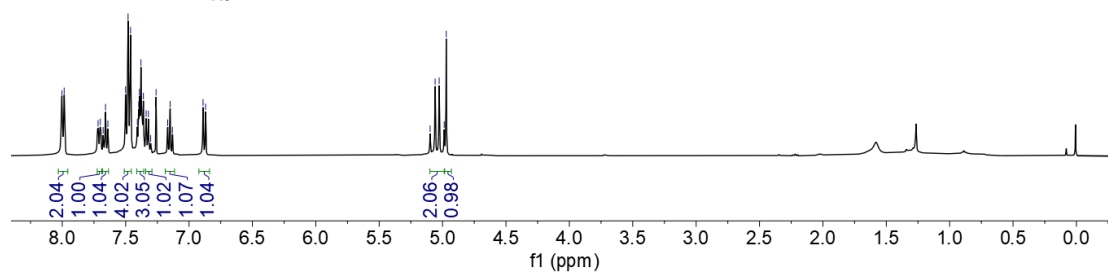

-96.47  
-97.29  
-98.26  
-99.08

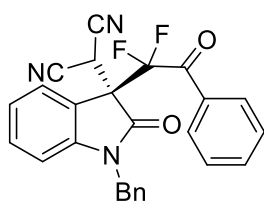

**4b**

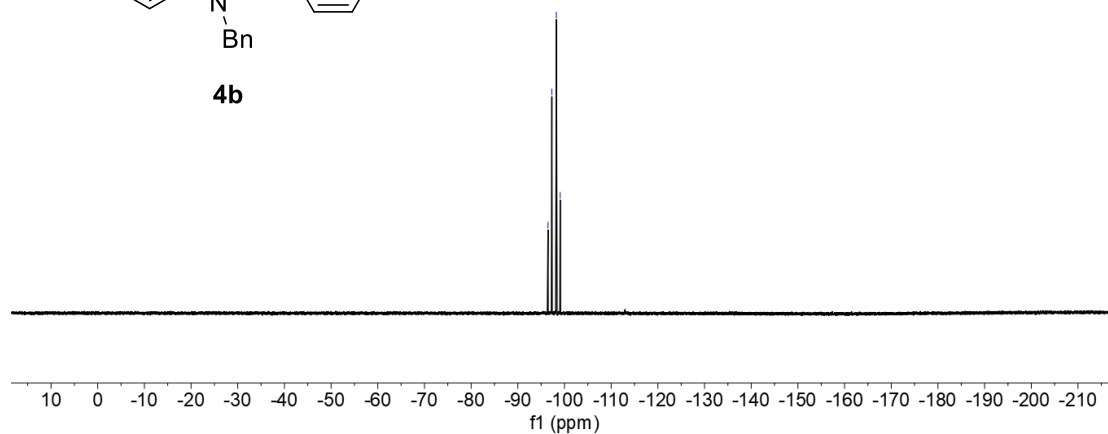

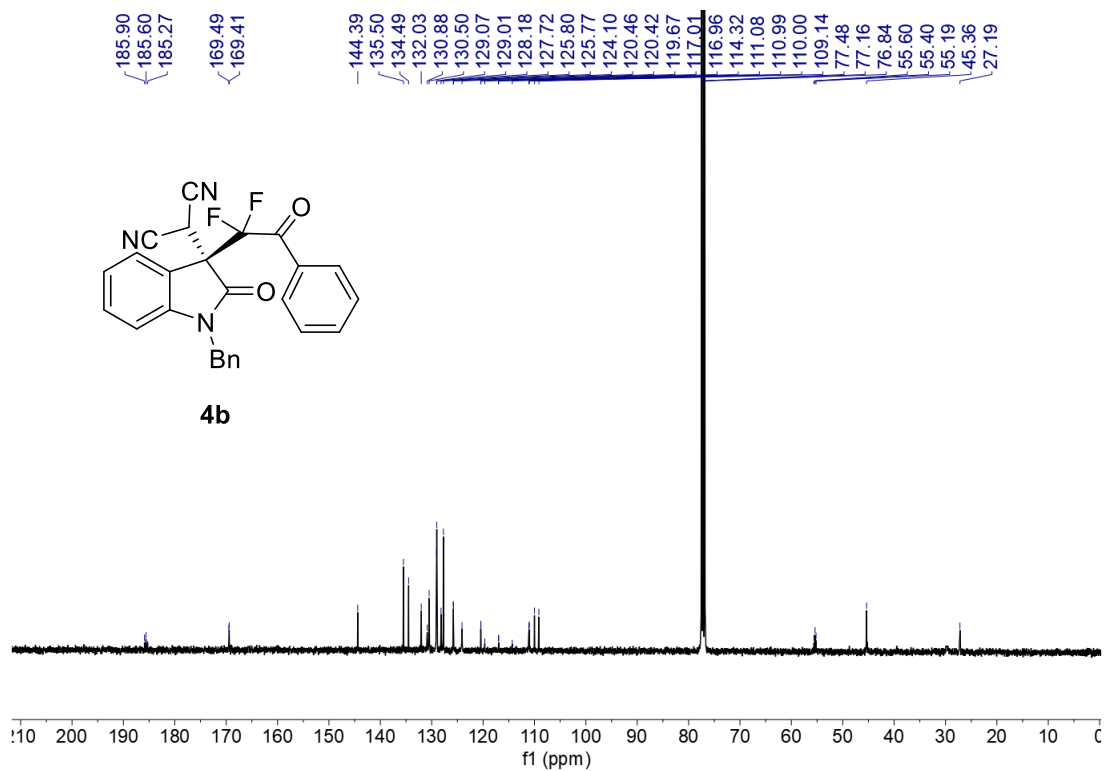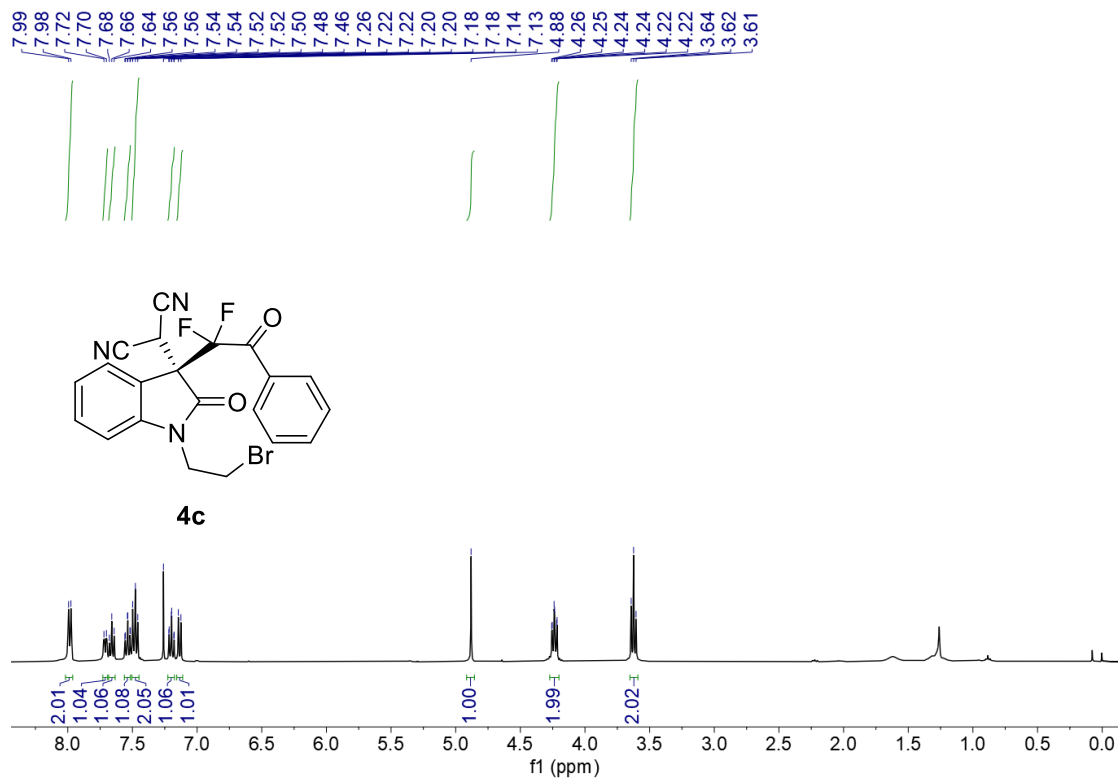

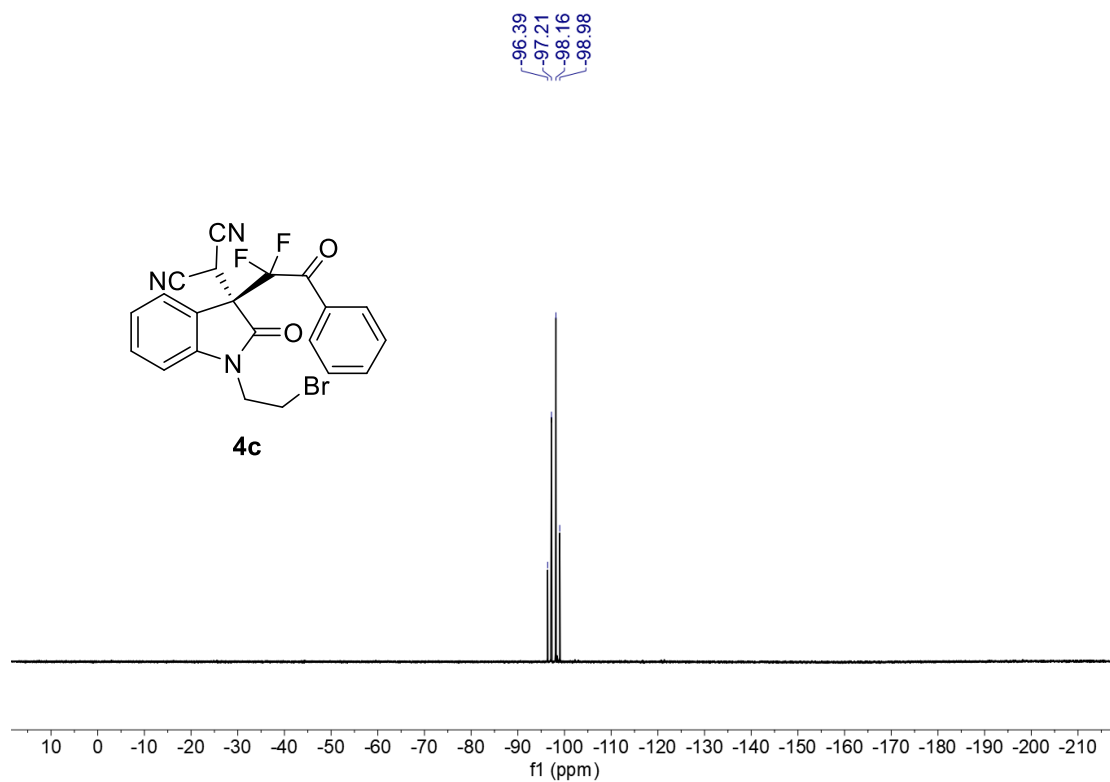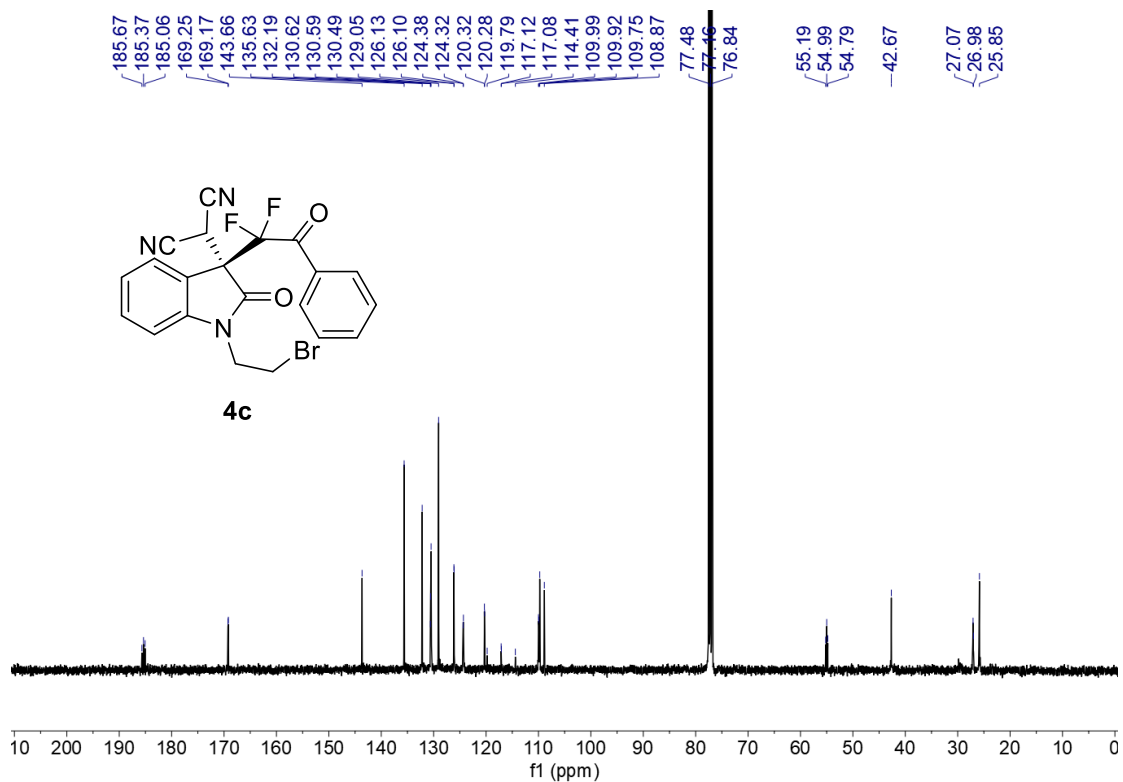

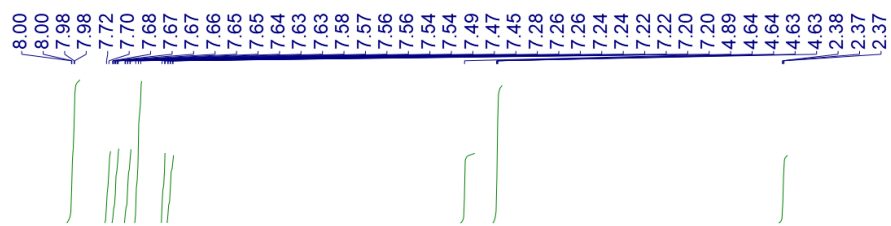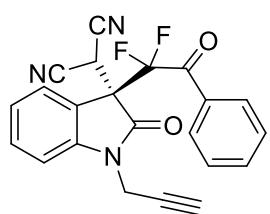

**4d**

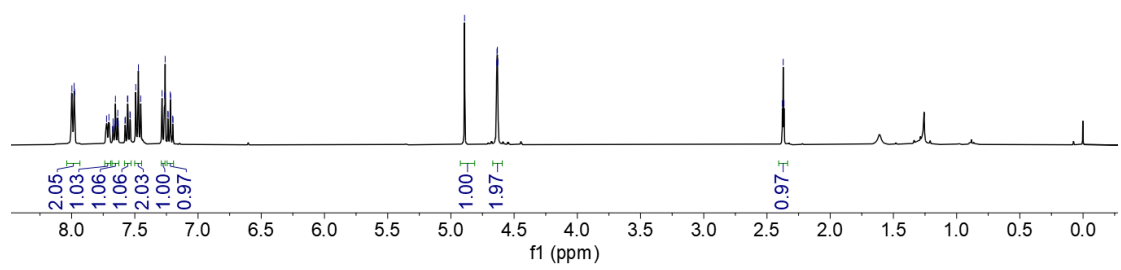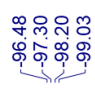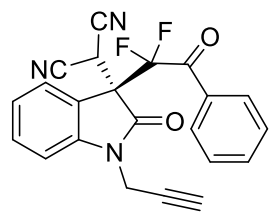

**4d**

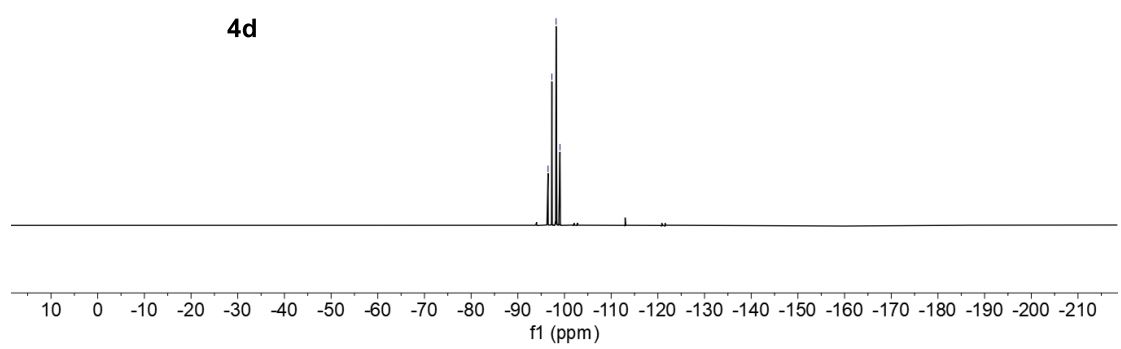

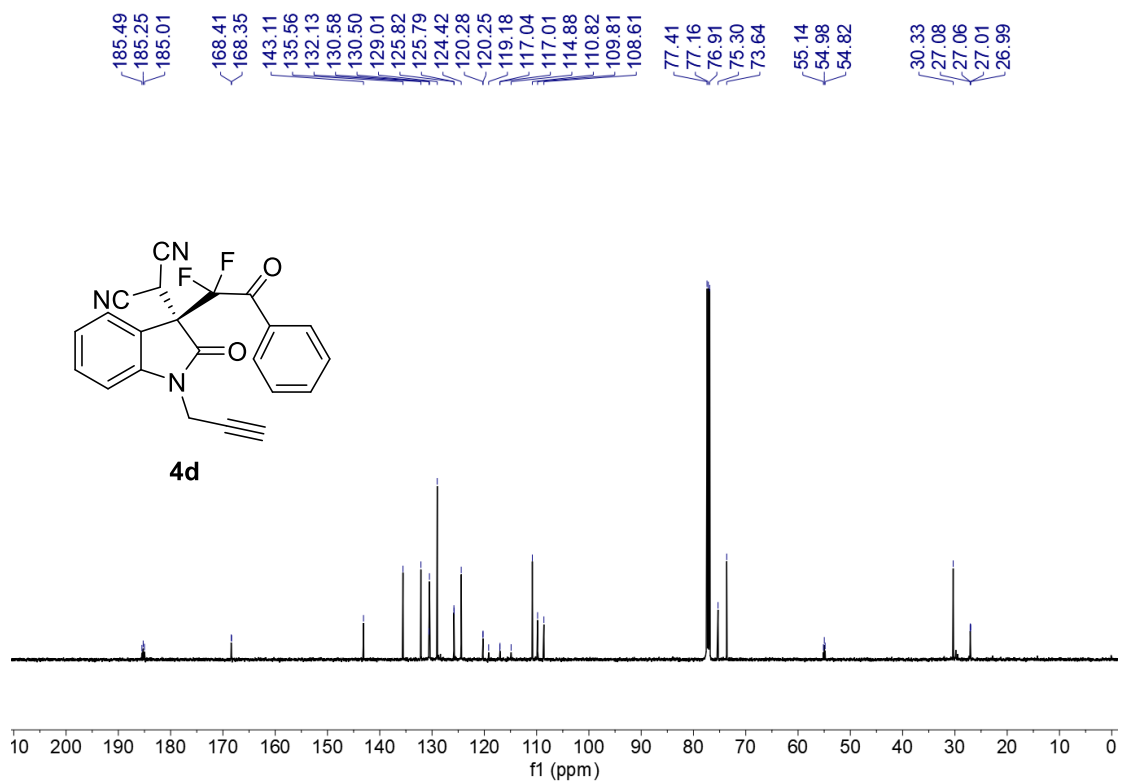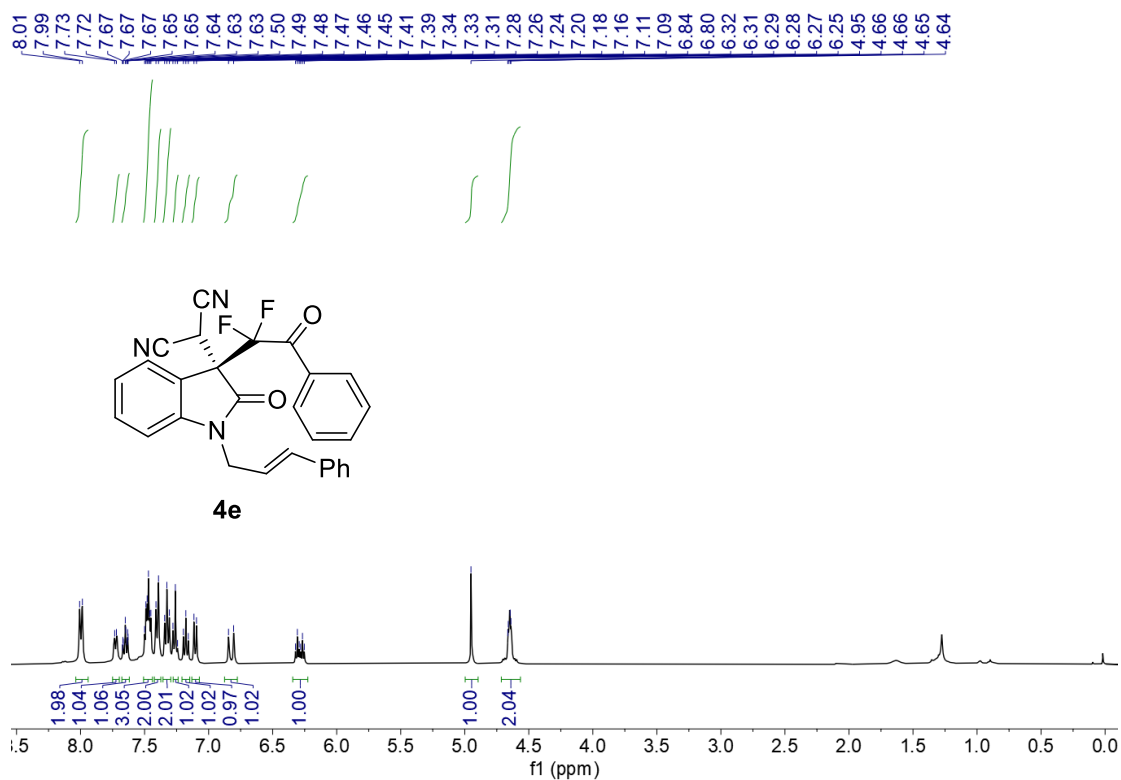

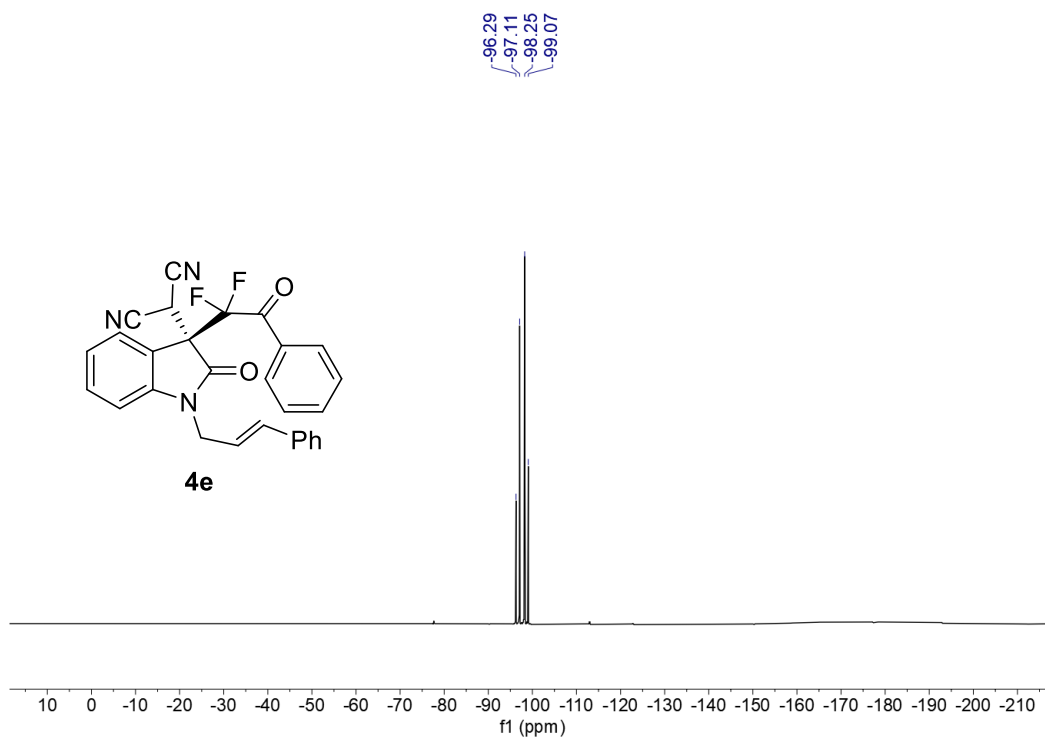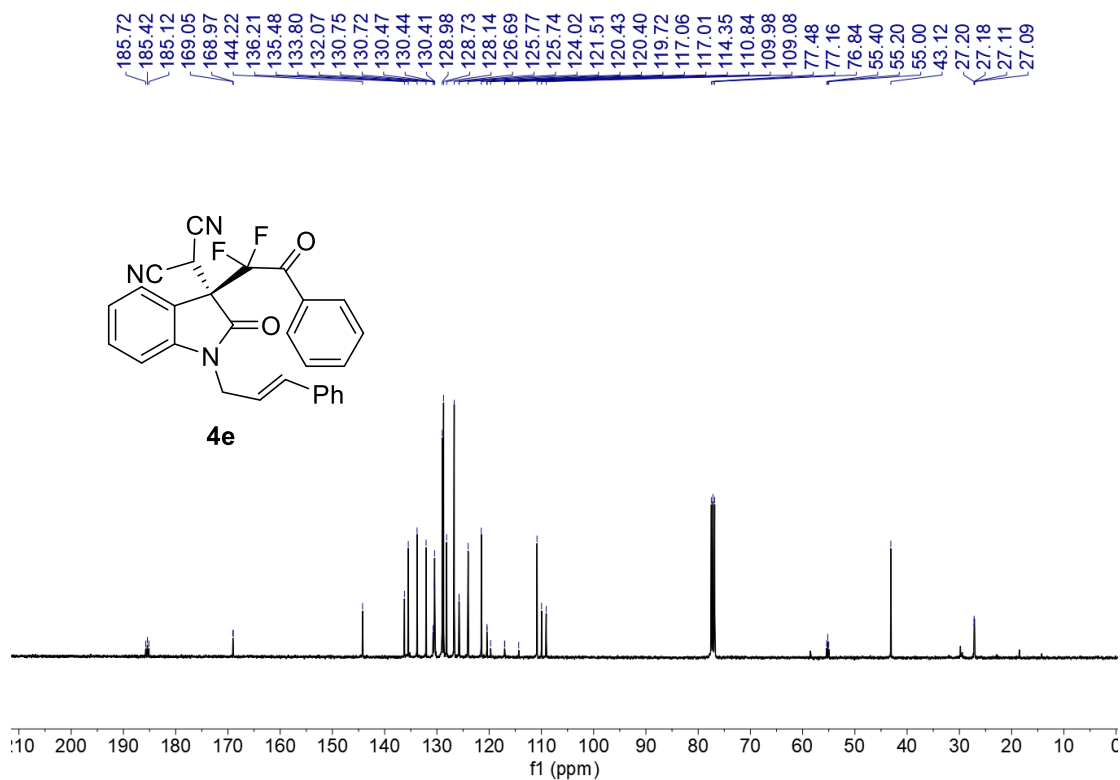

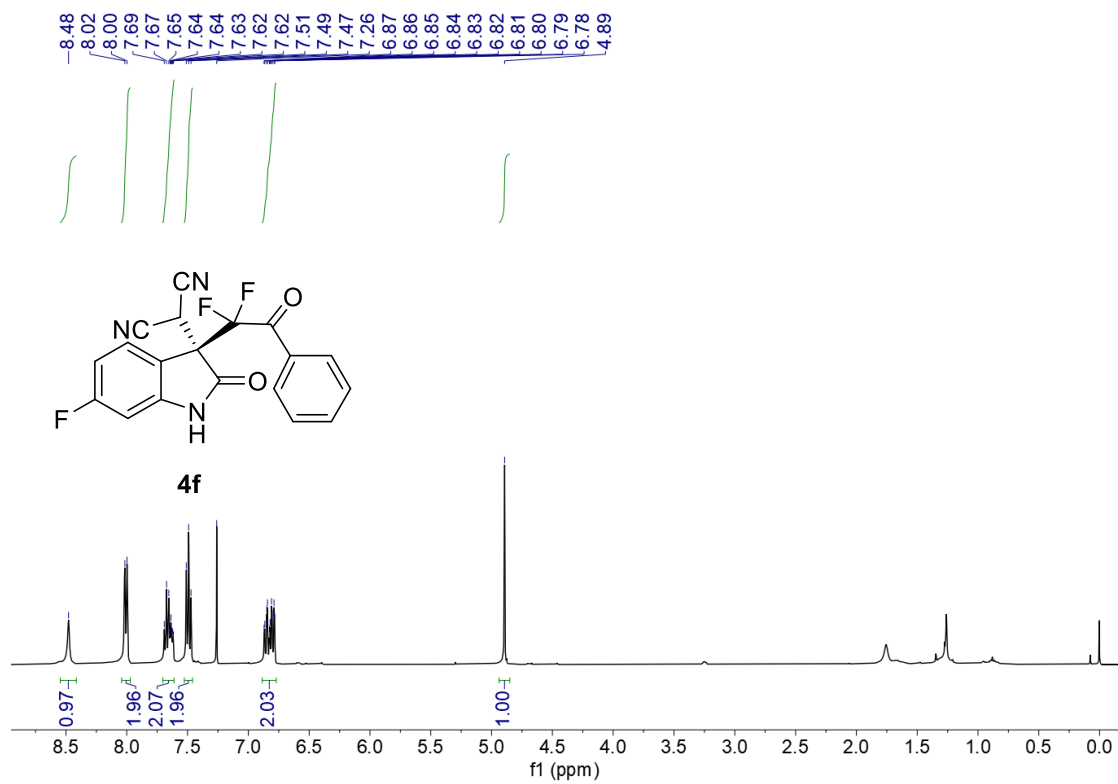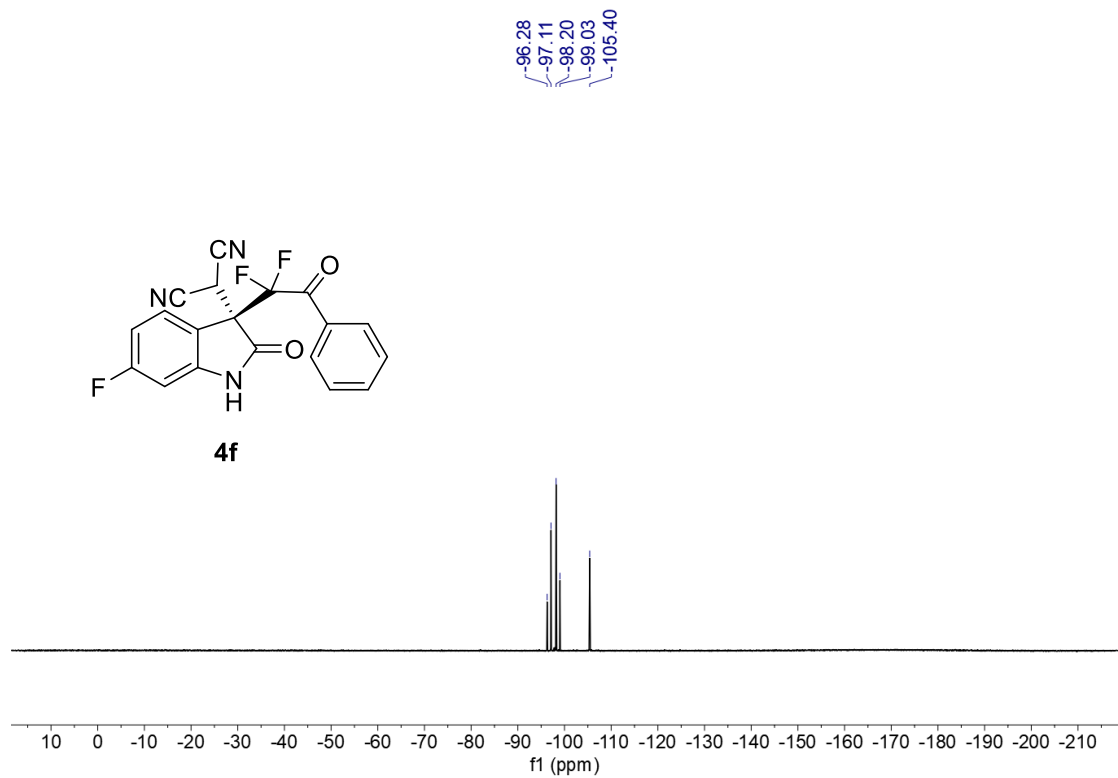



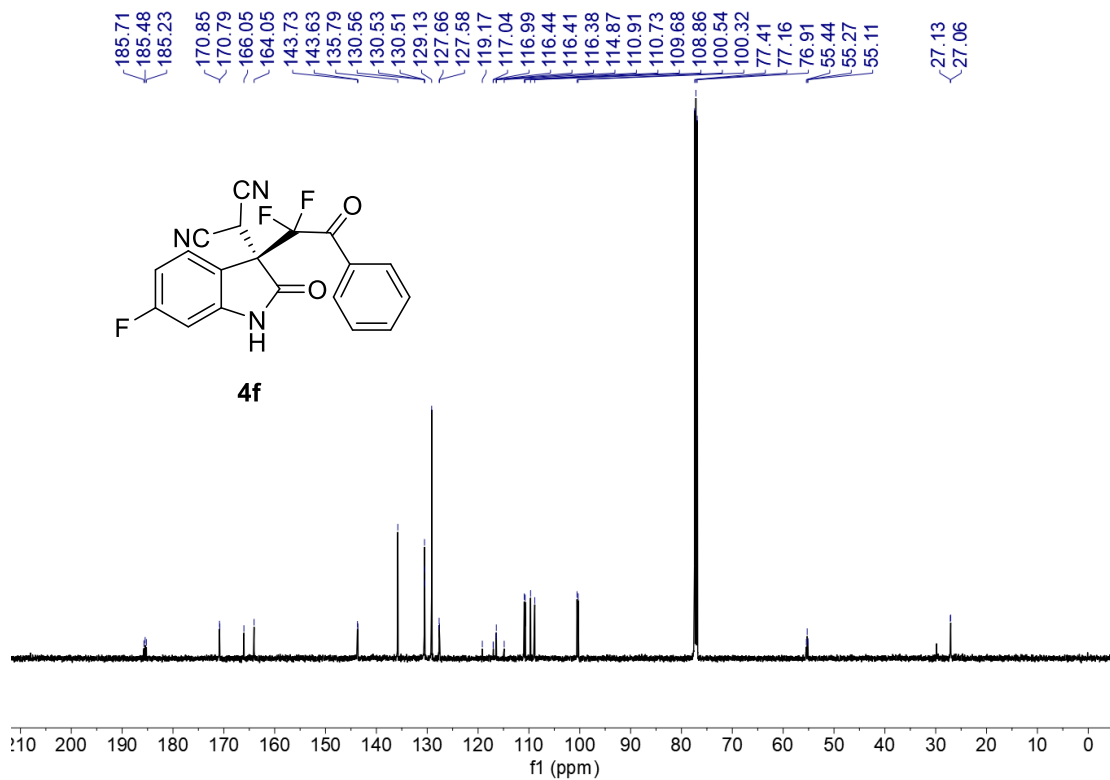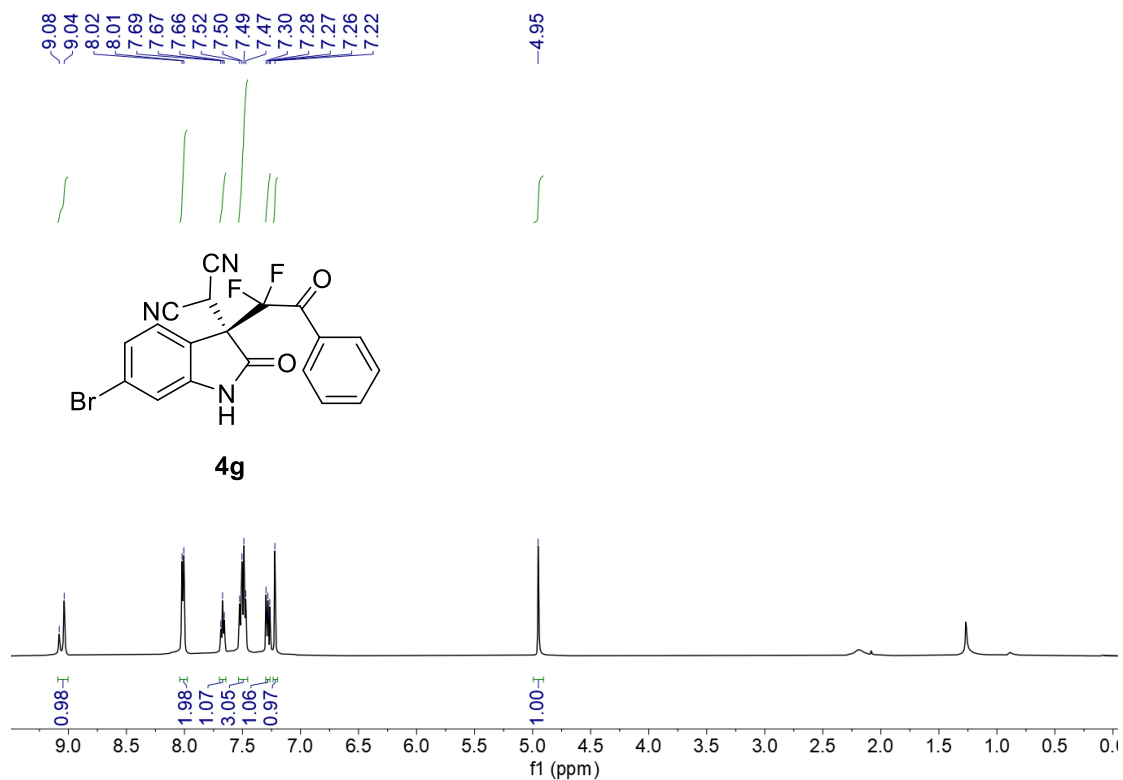

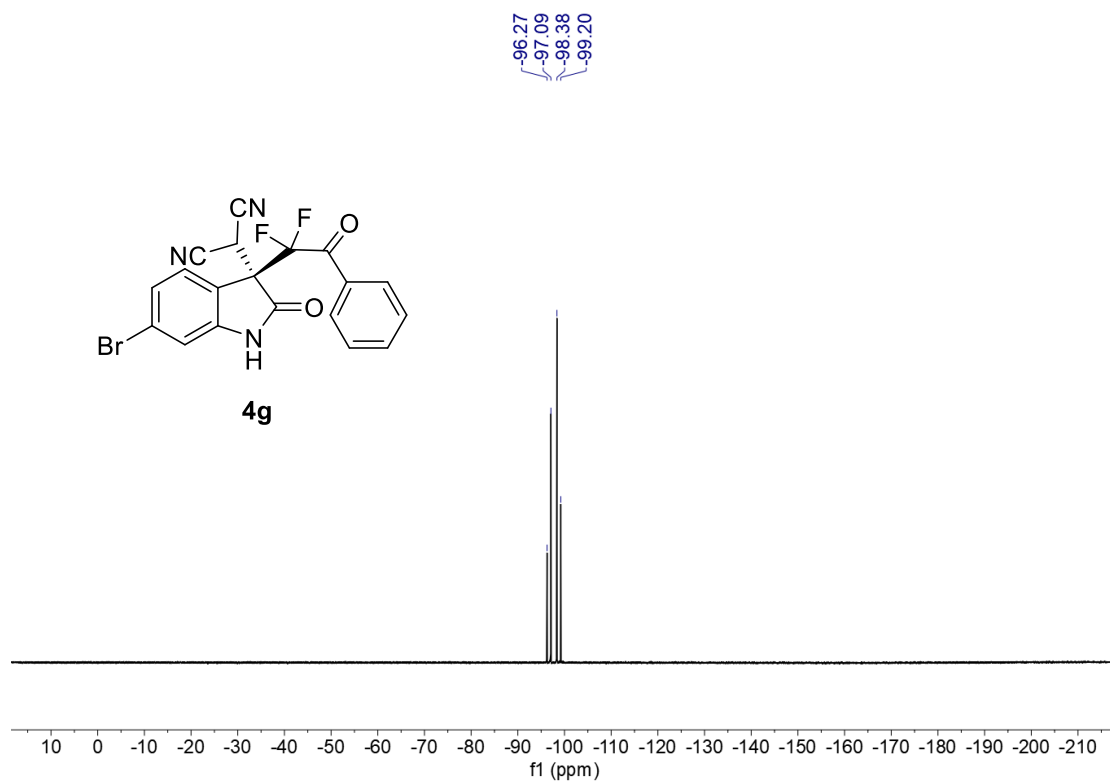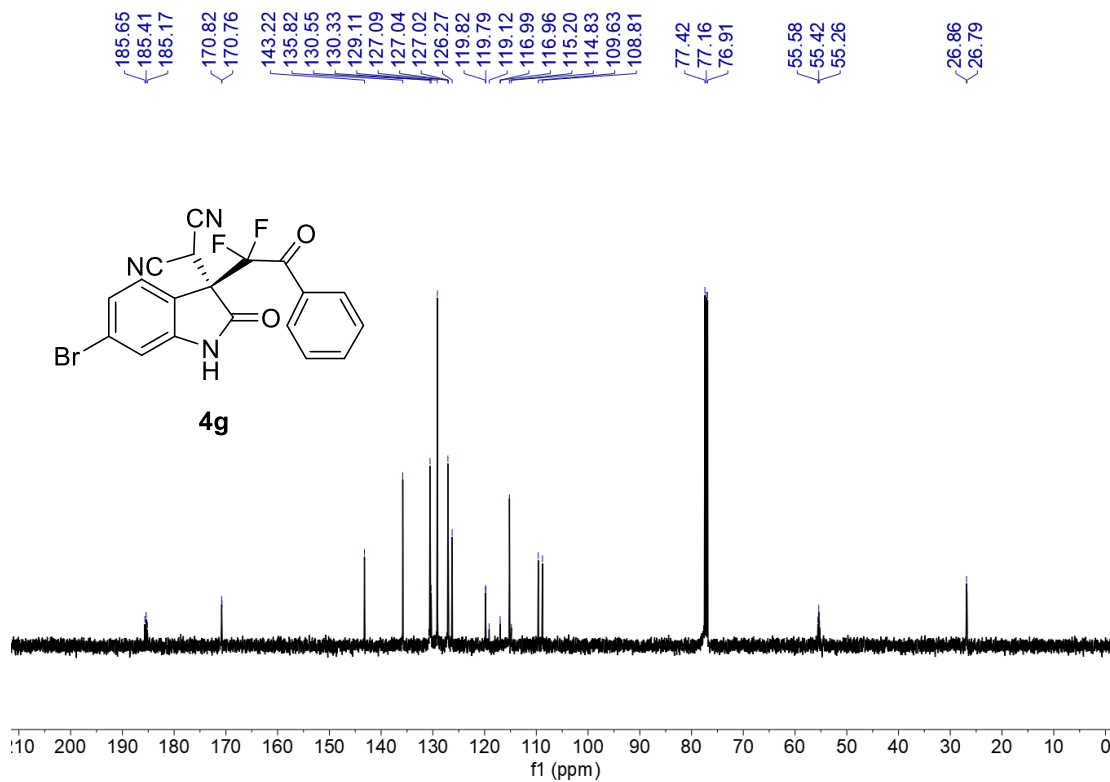

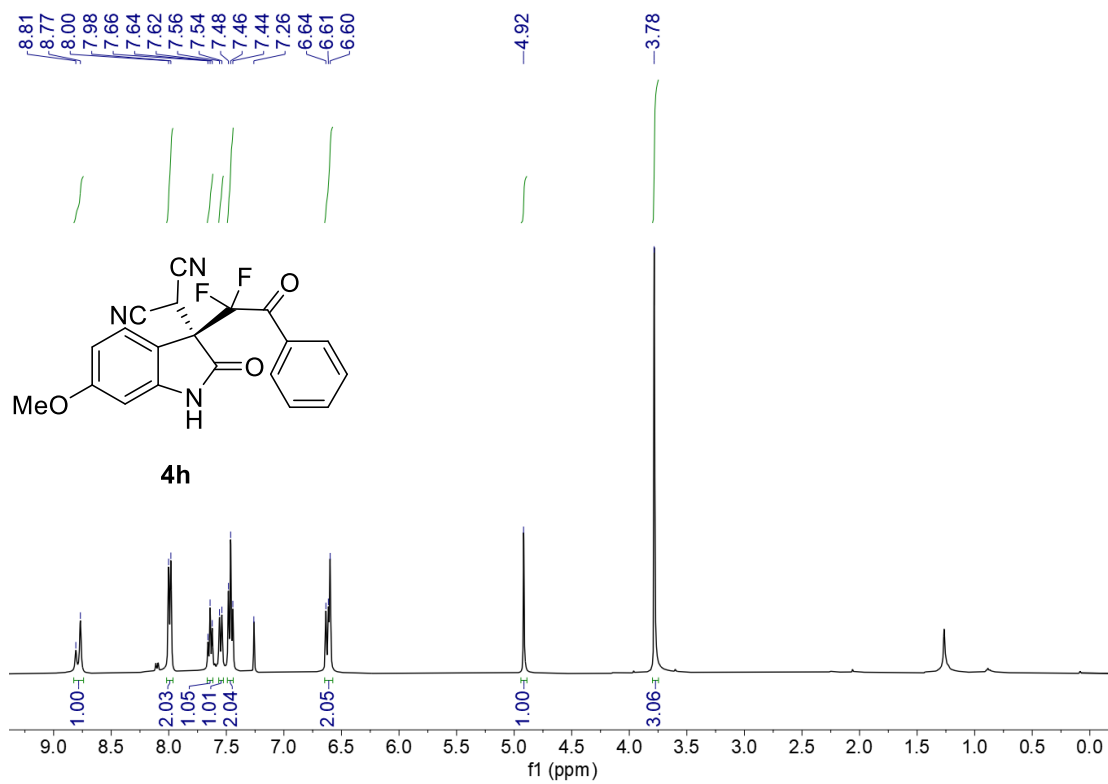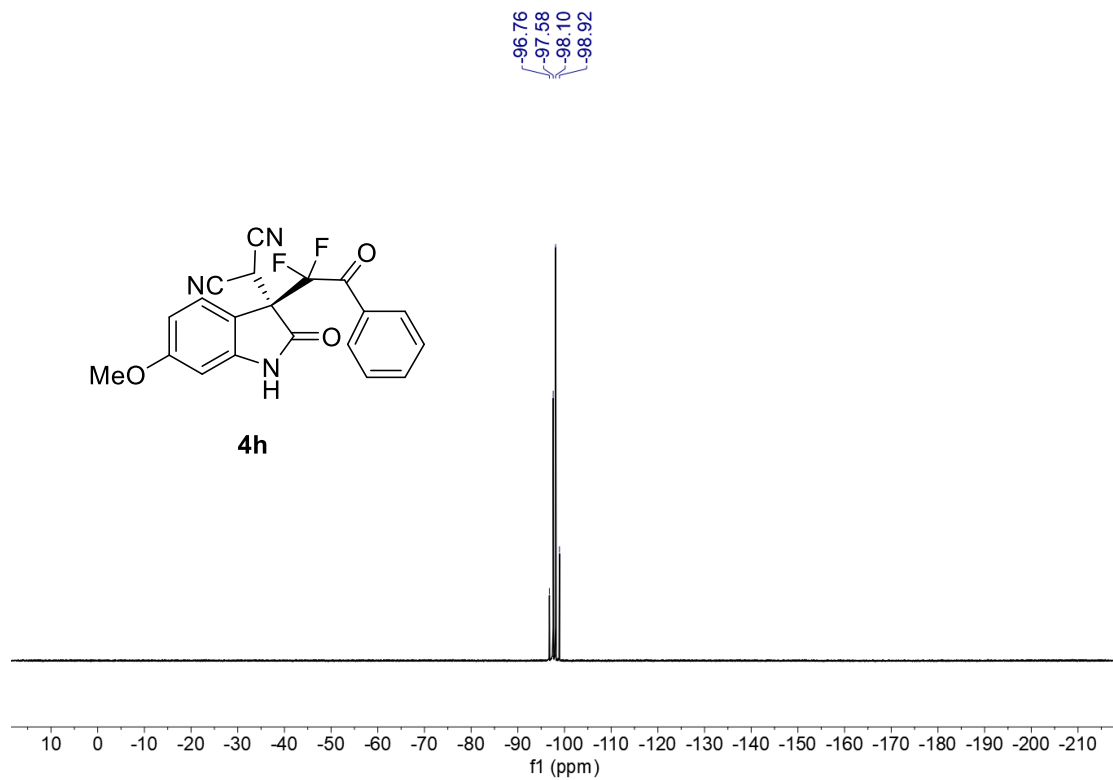

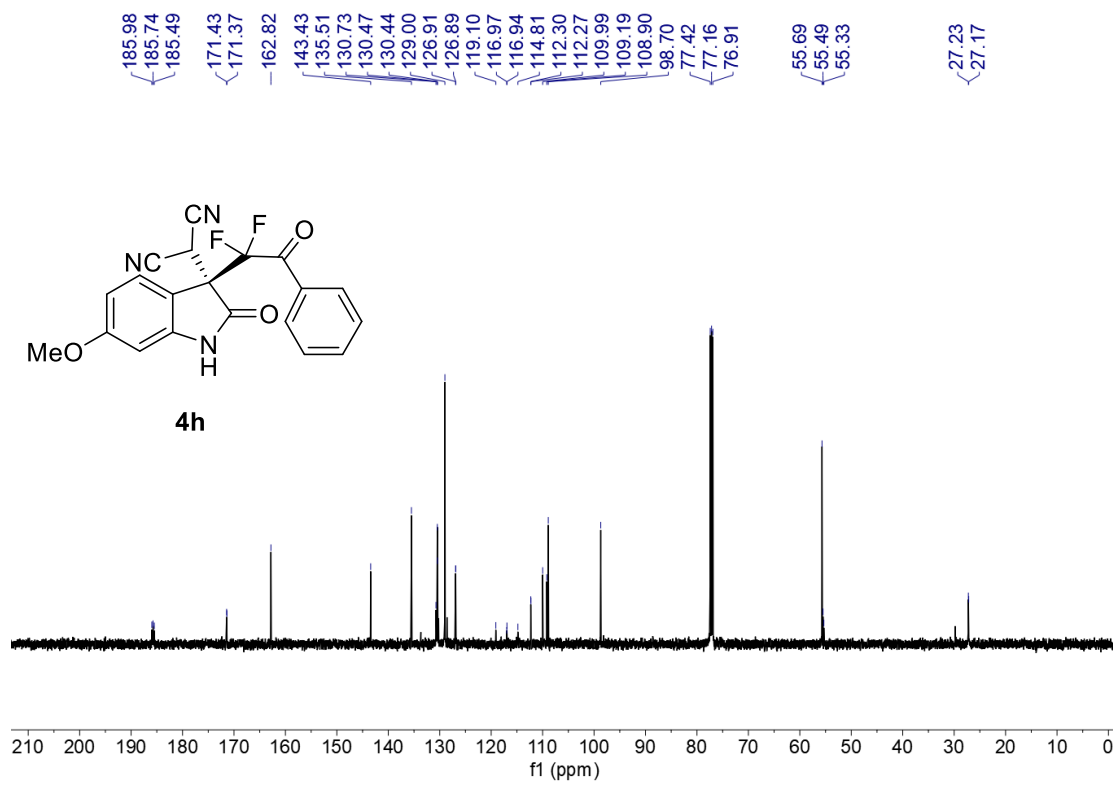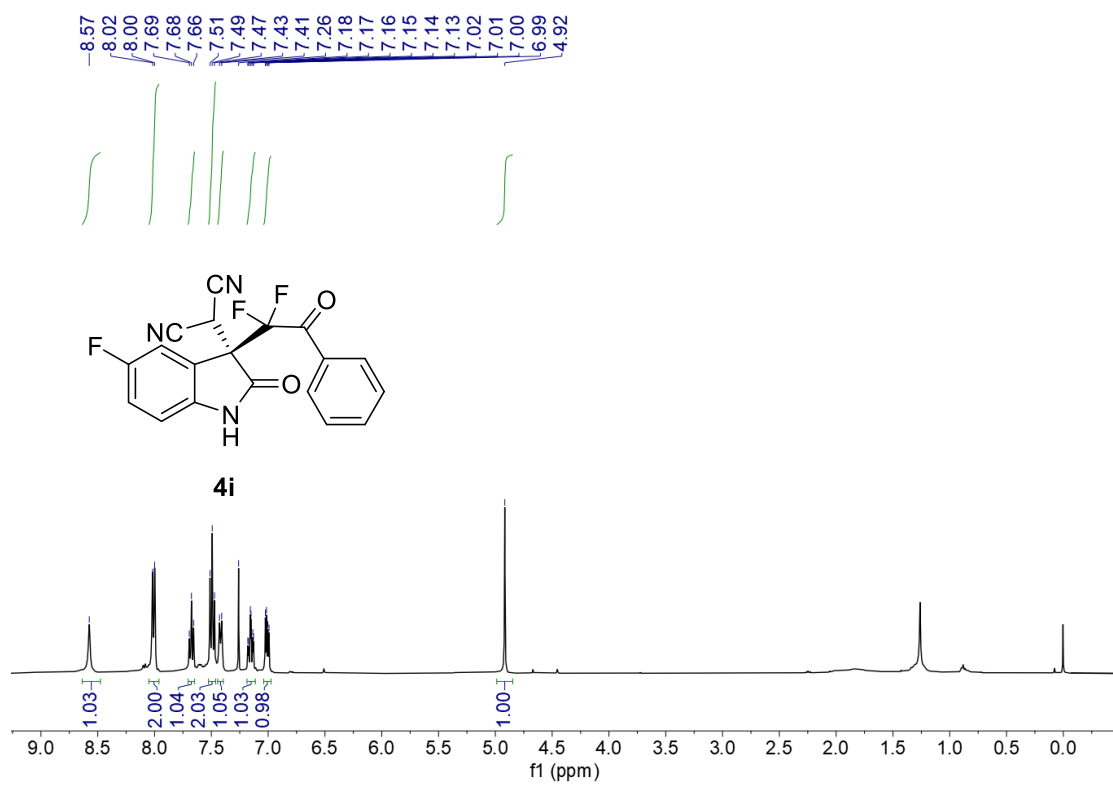

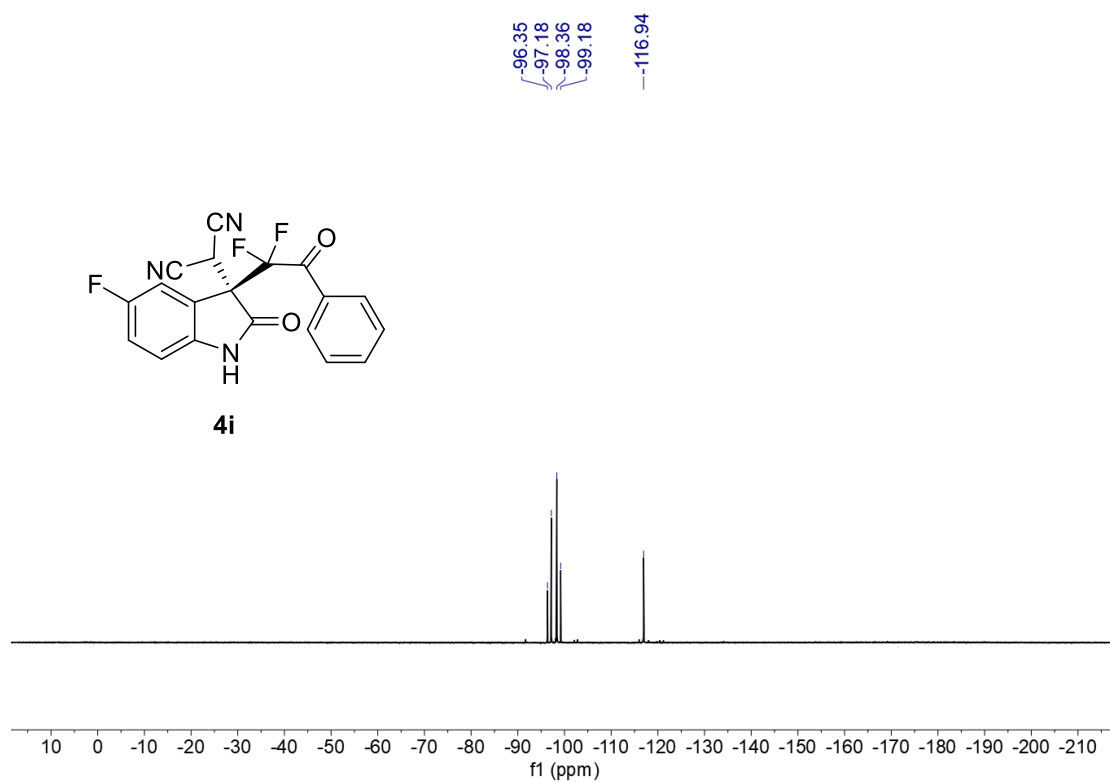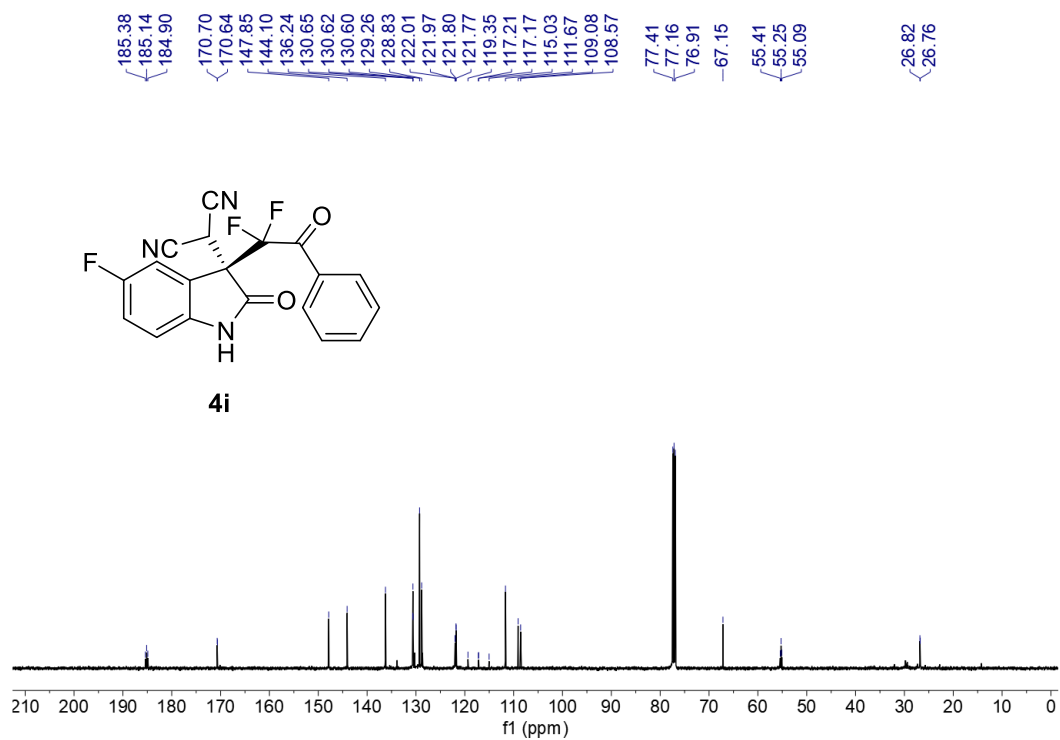

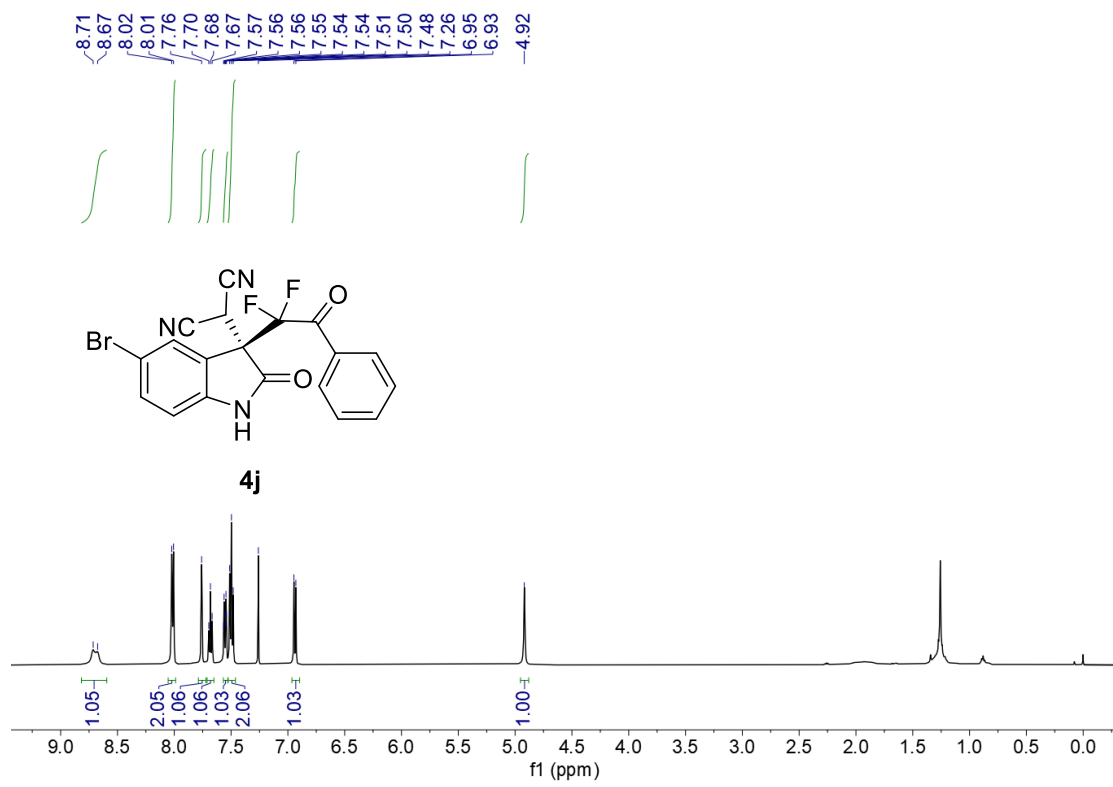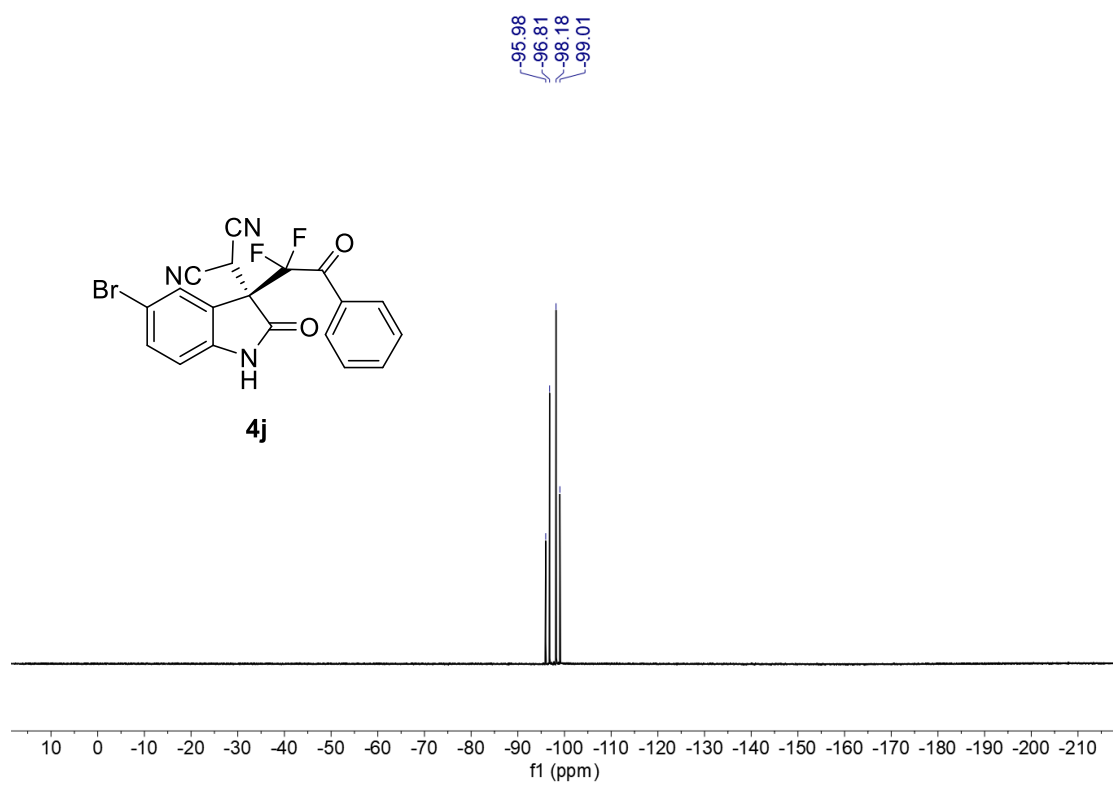

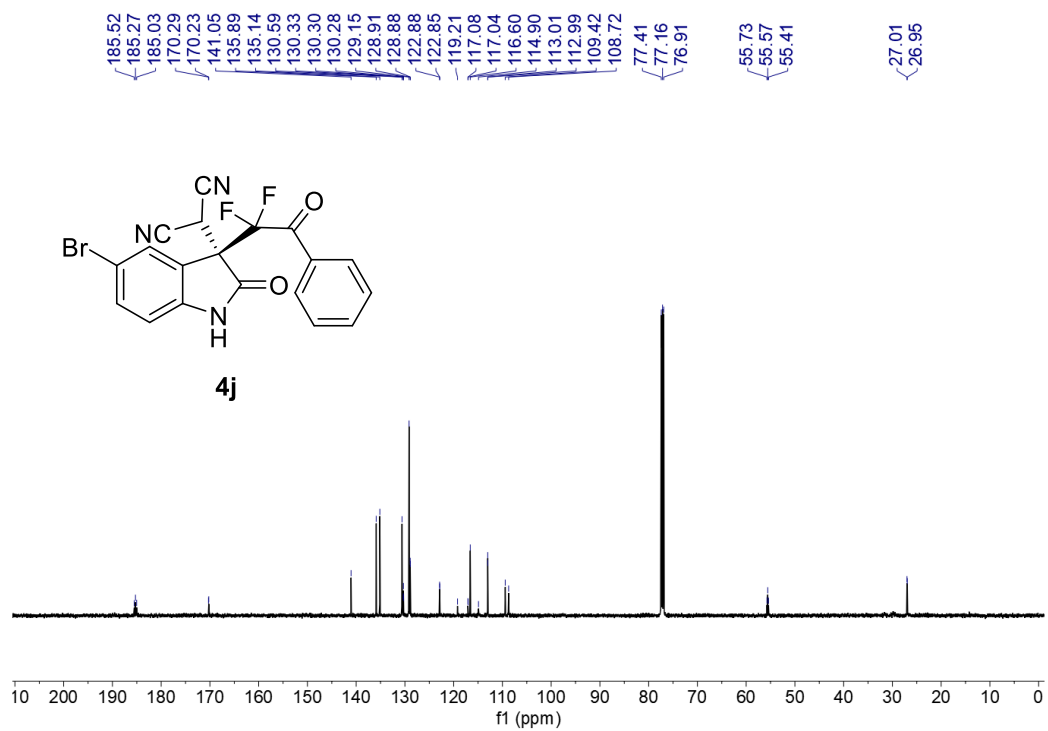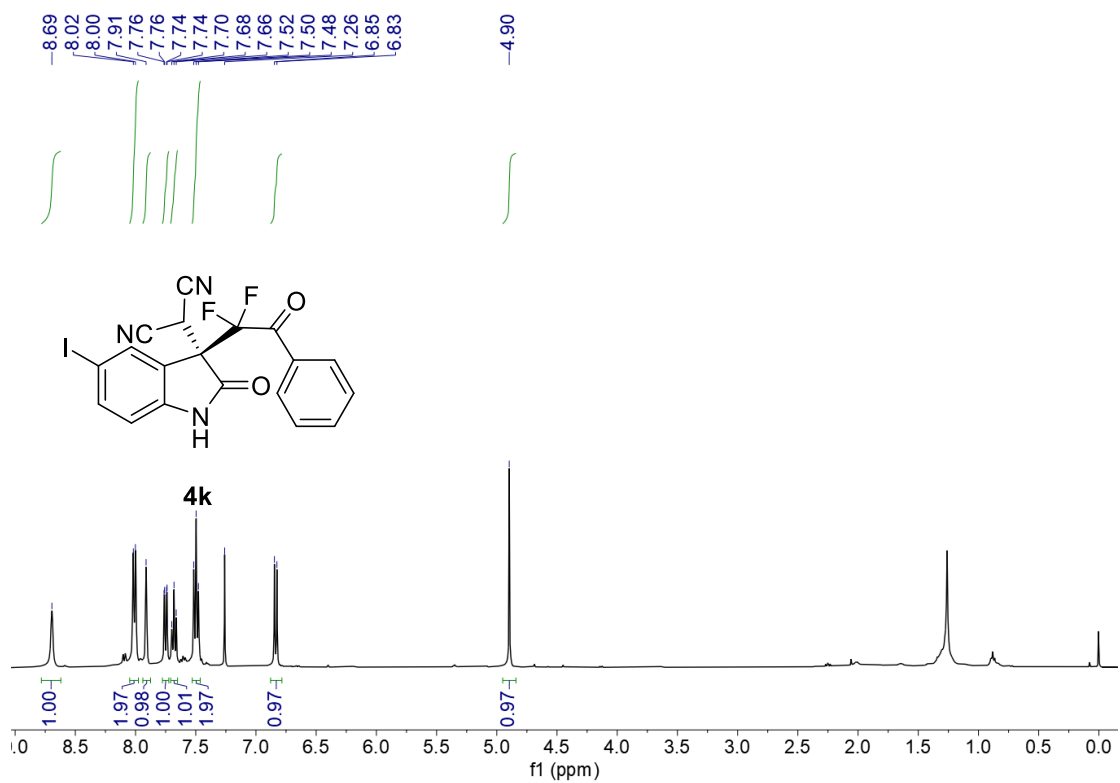

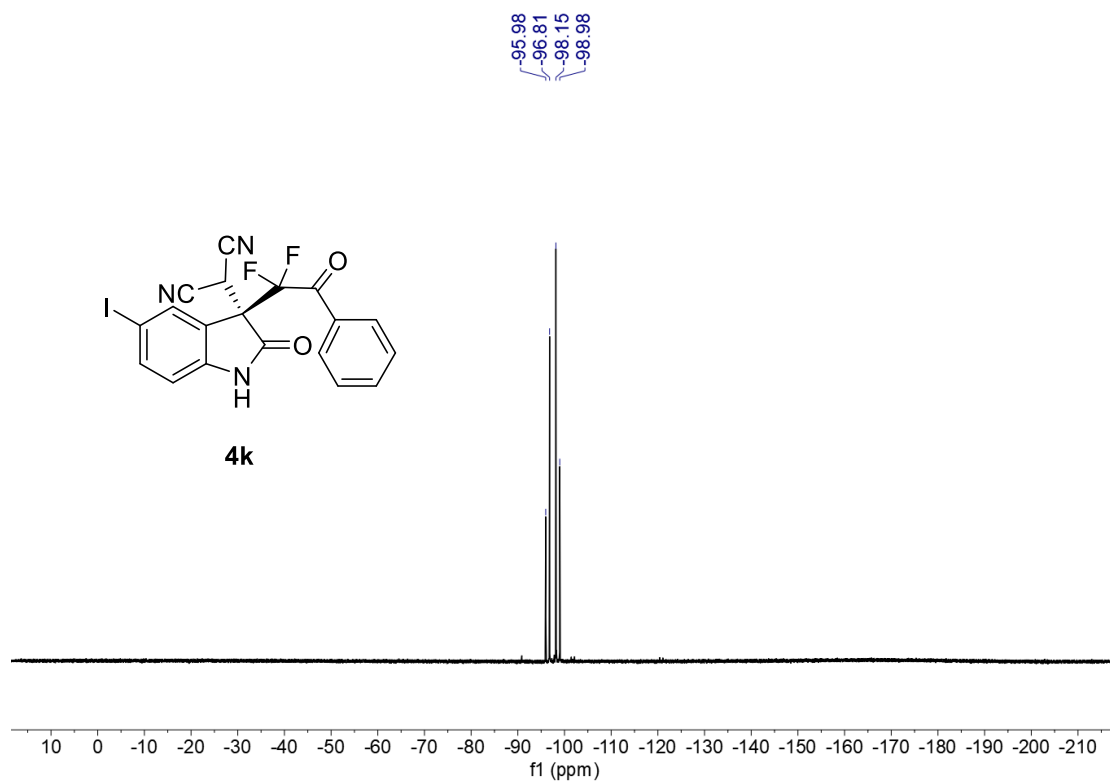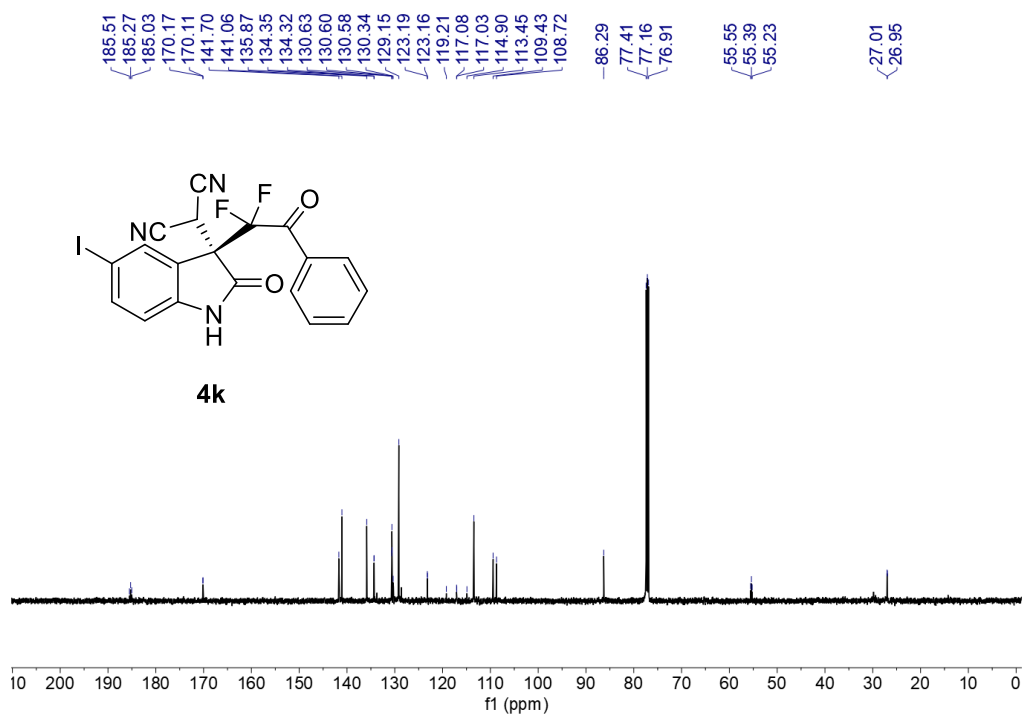



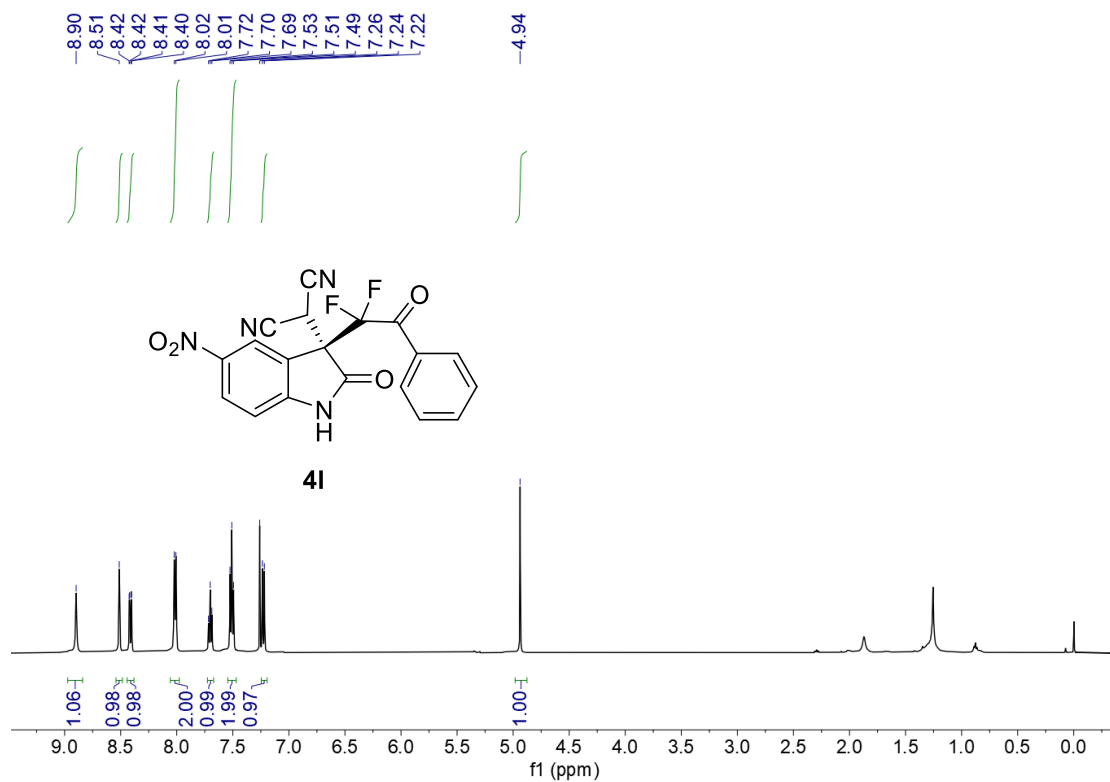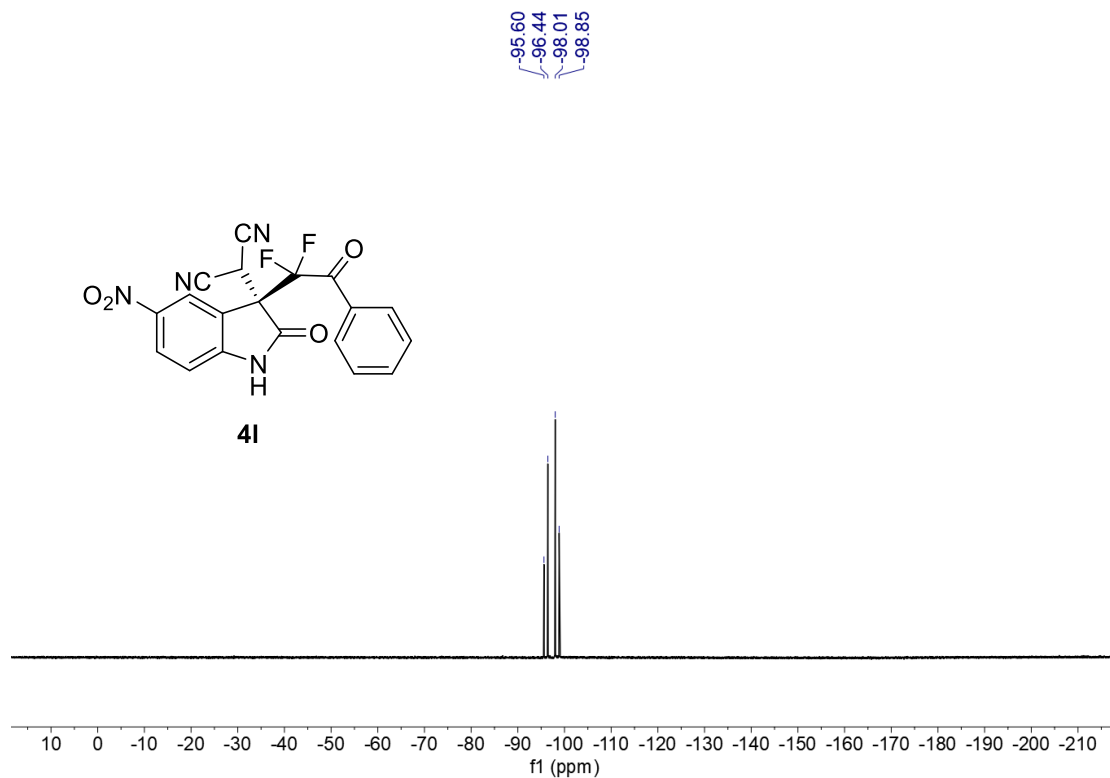

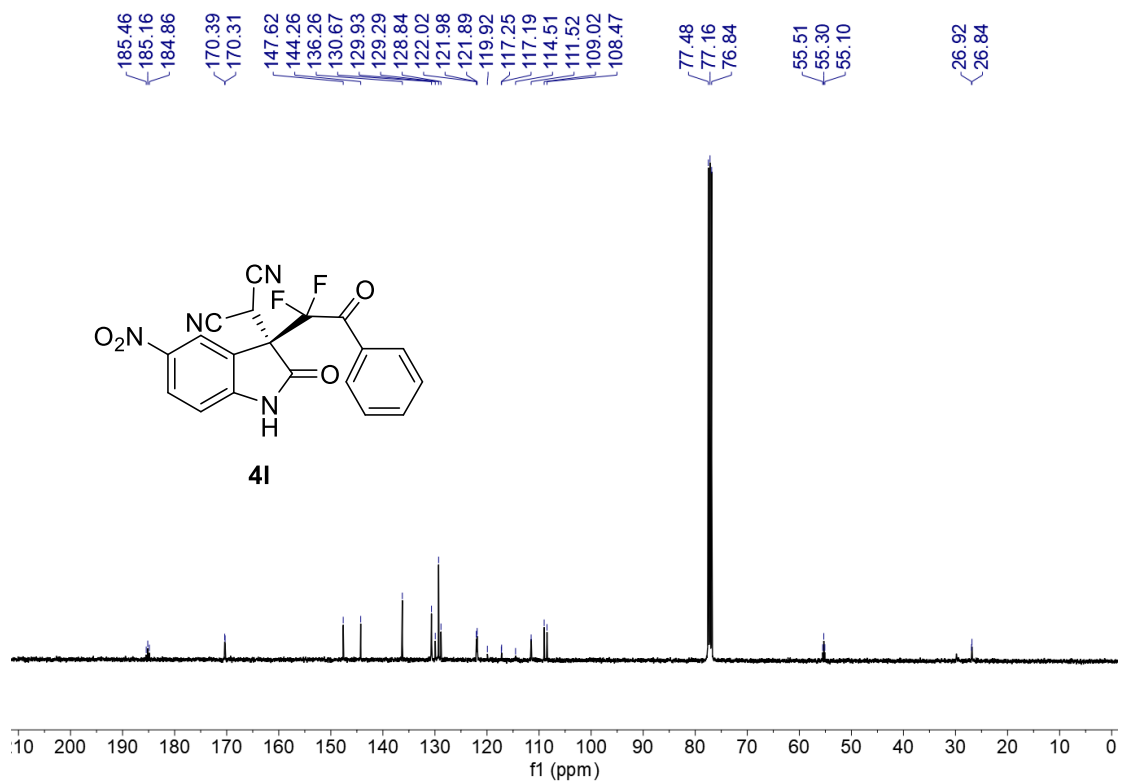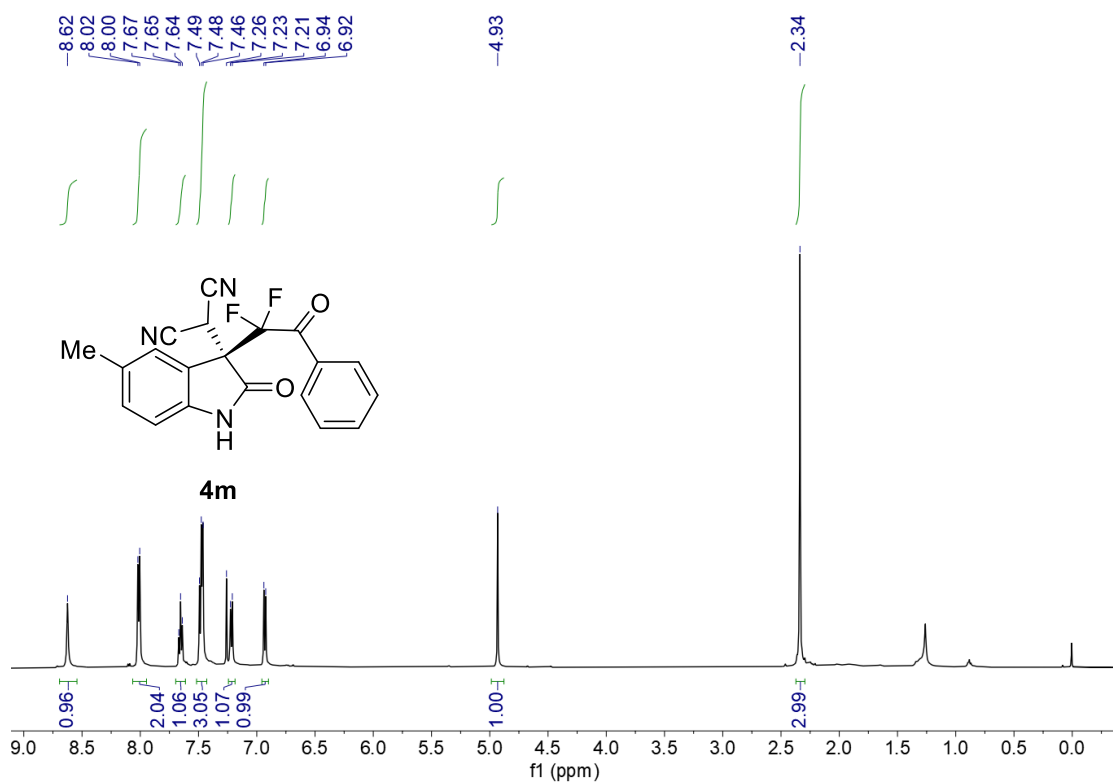

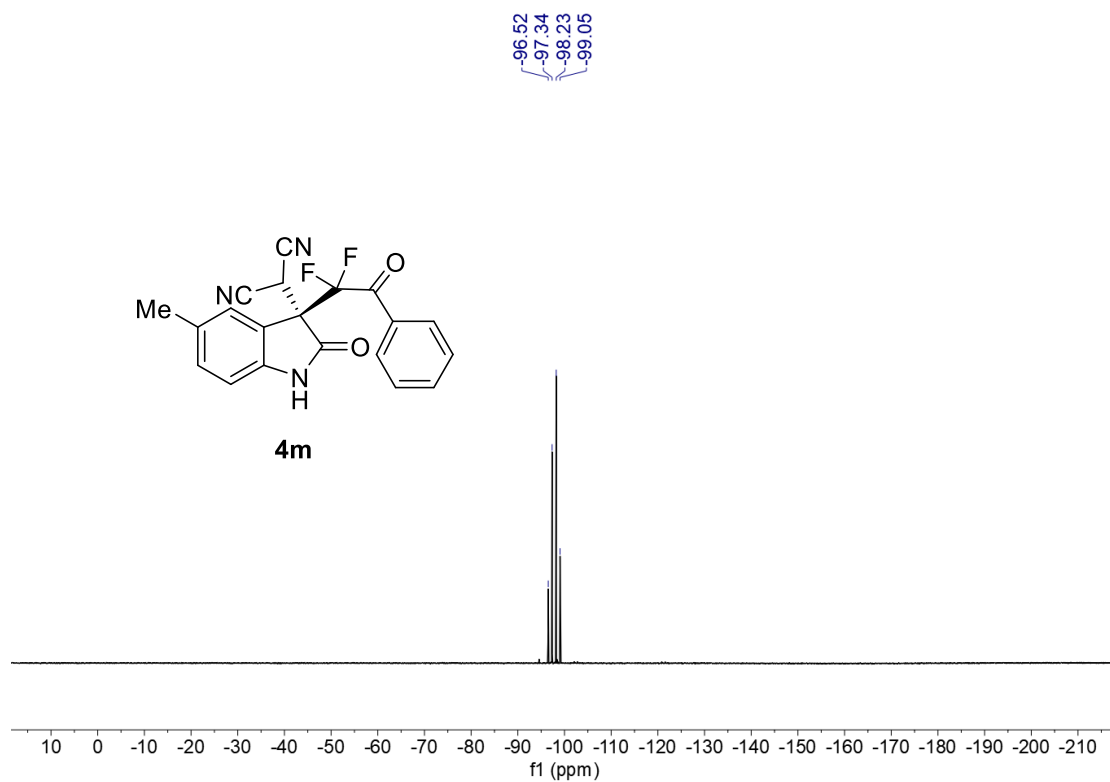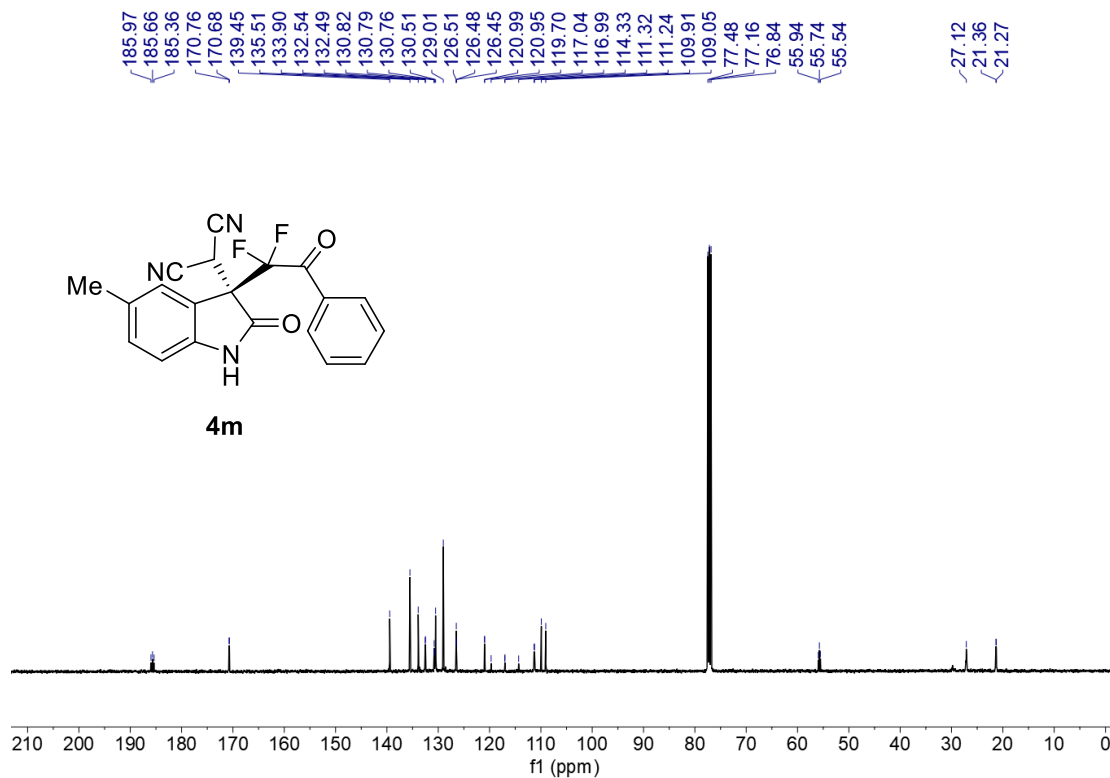

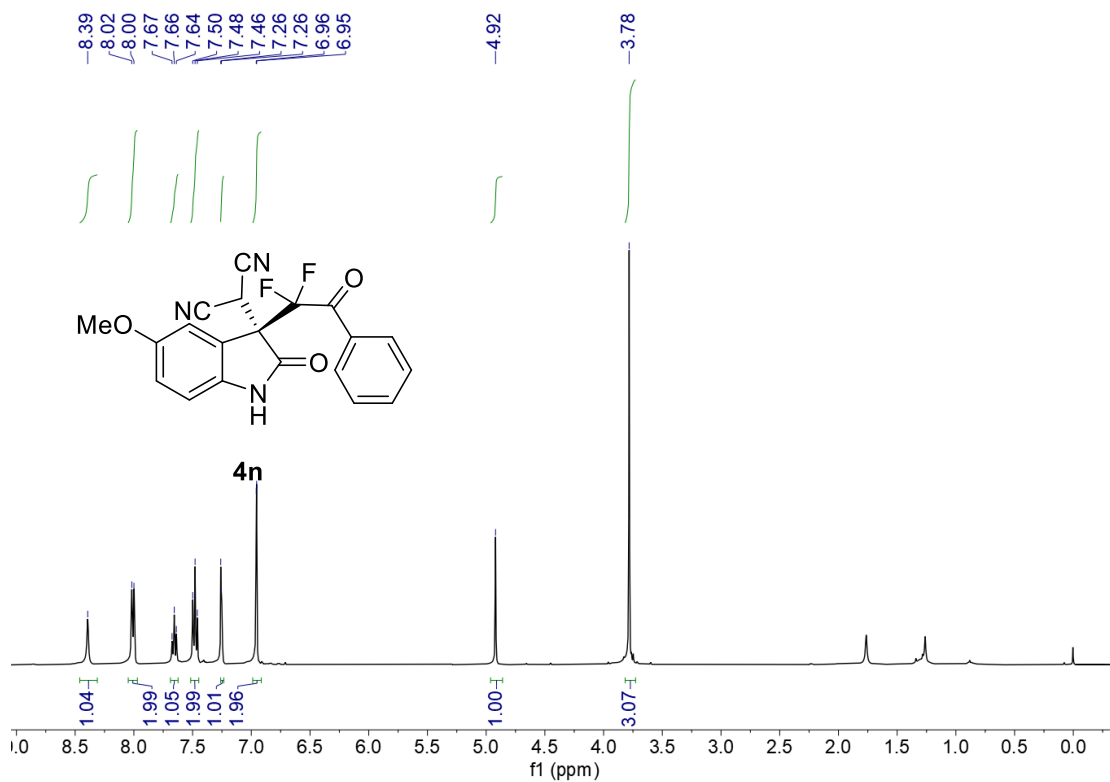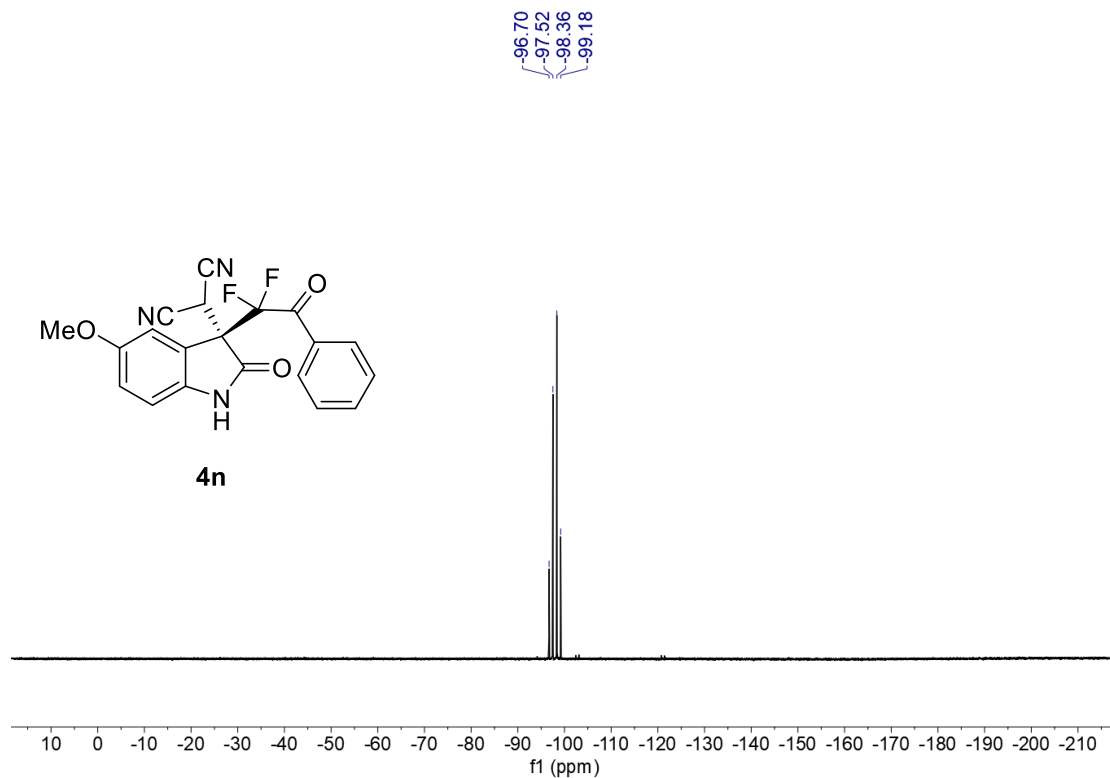

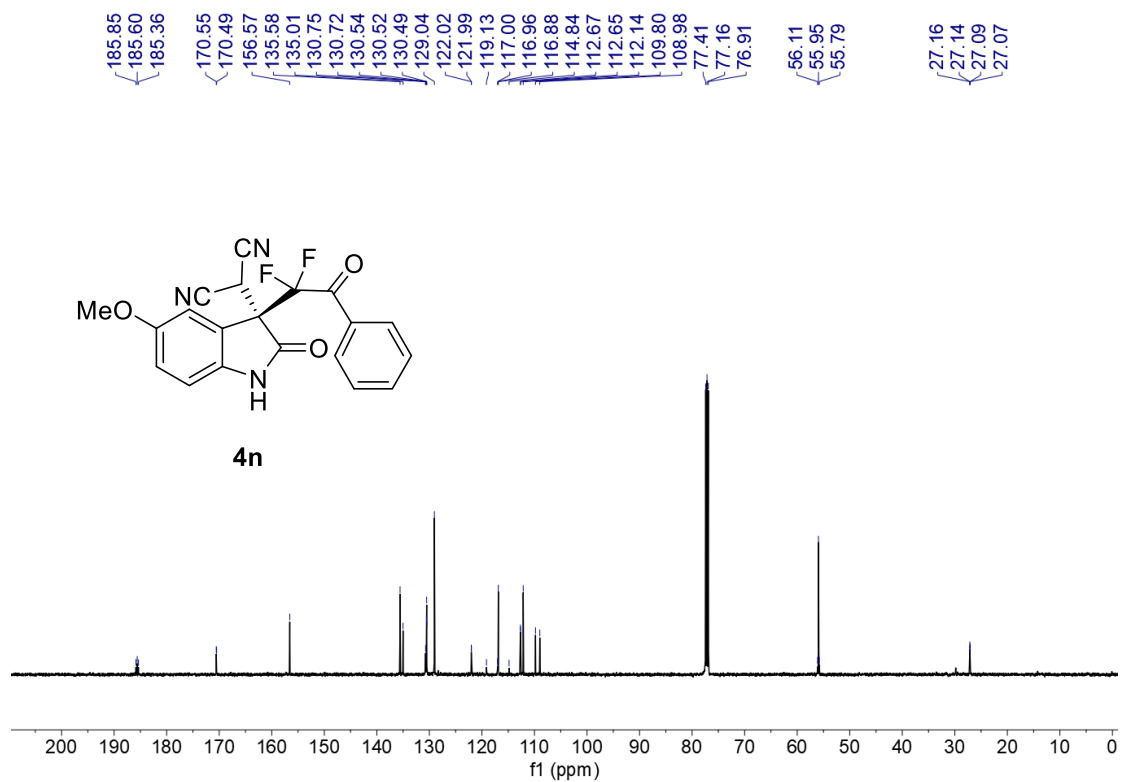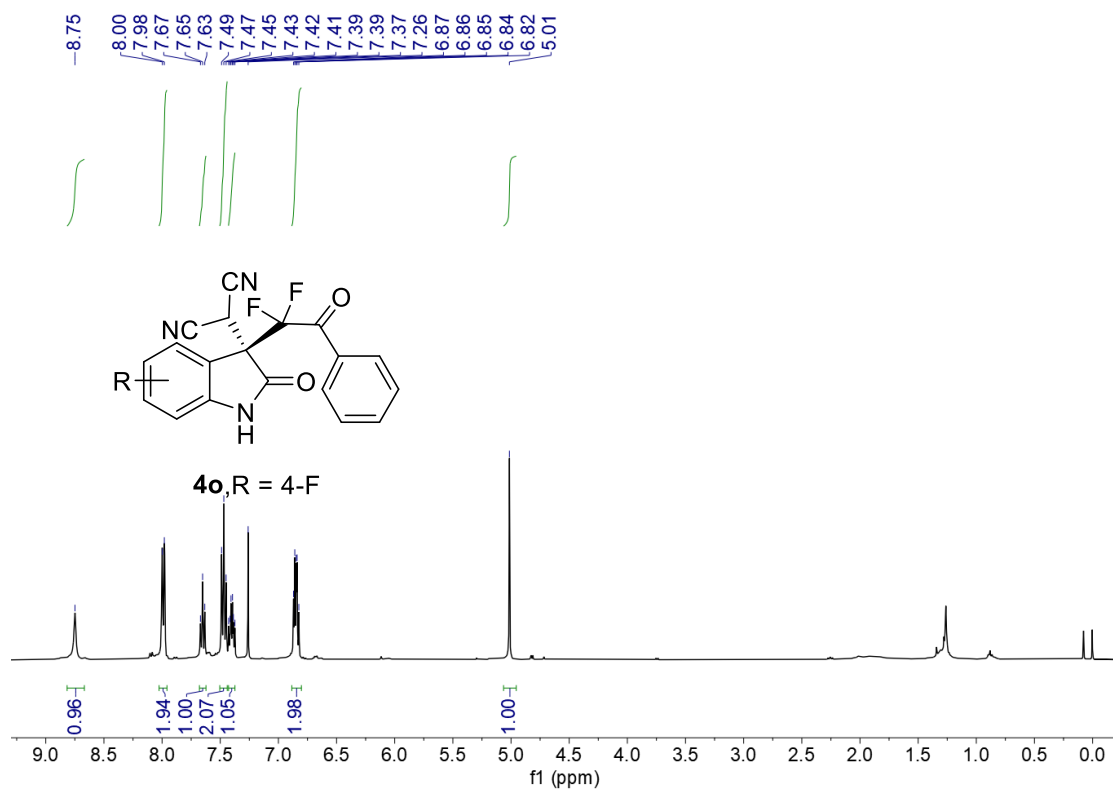

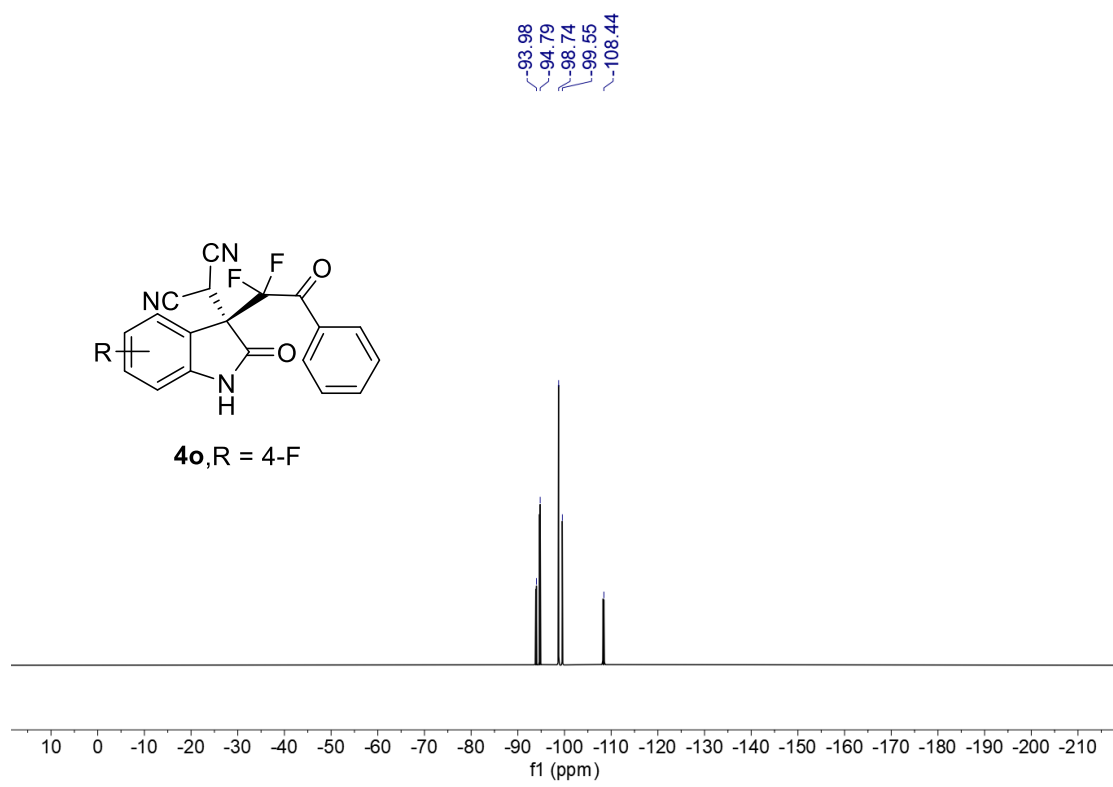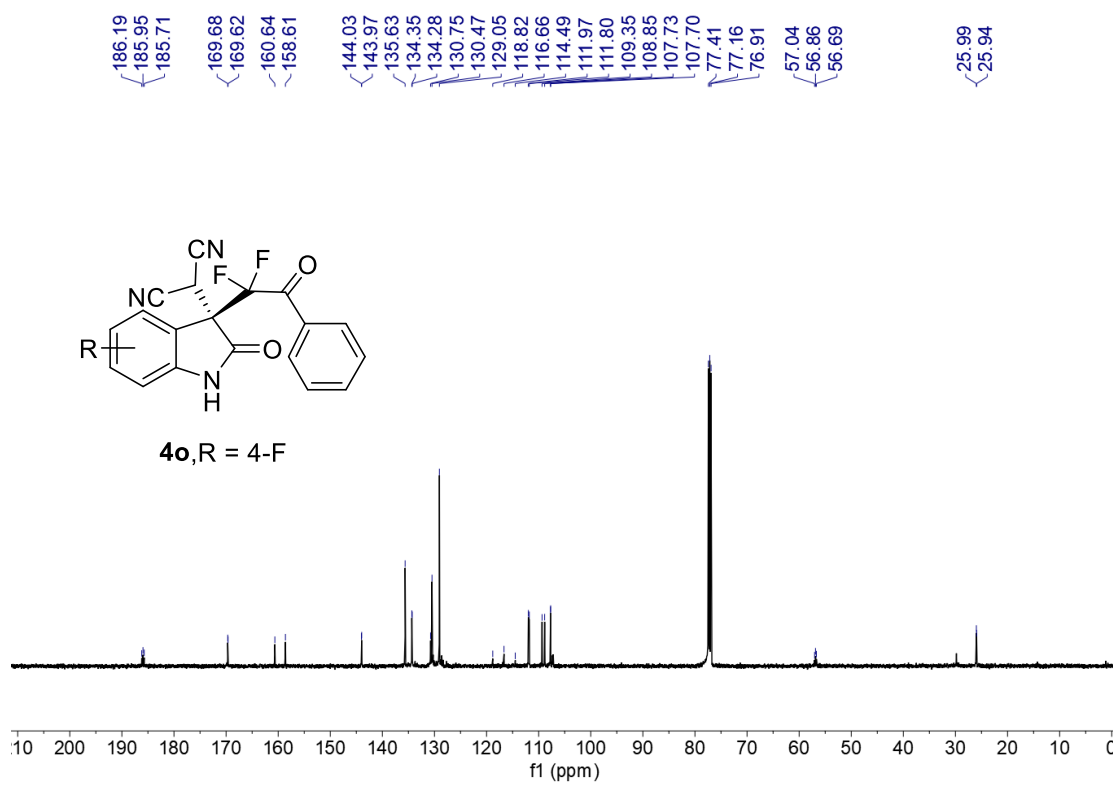

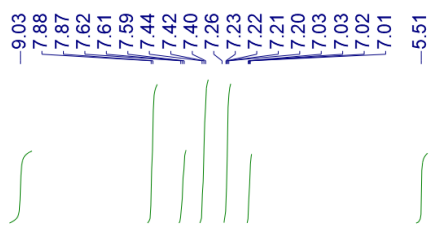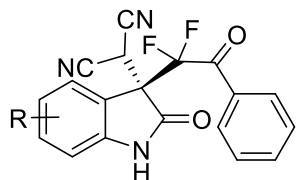

**4p, R = 4-Br**

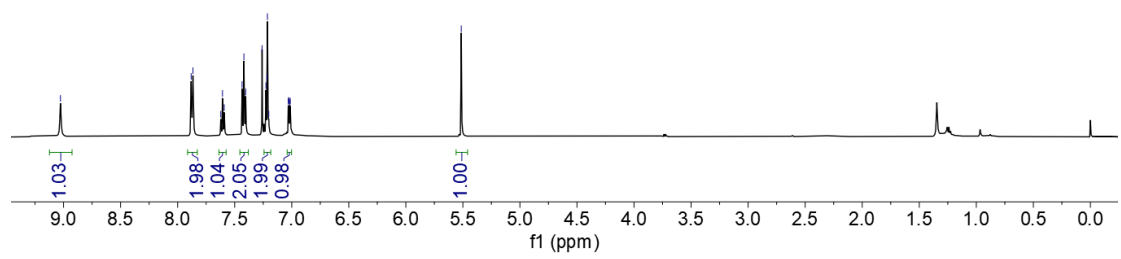

~91.31  
~92.08  
~96.46  
~97.23

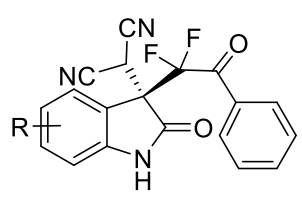

**4p, R = 4-Br**

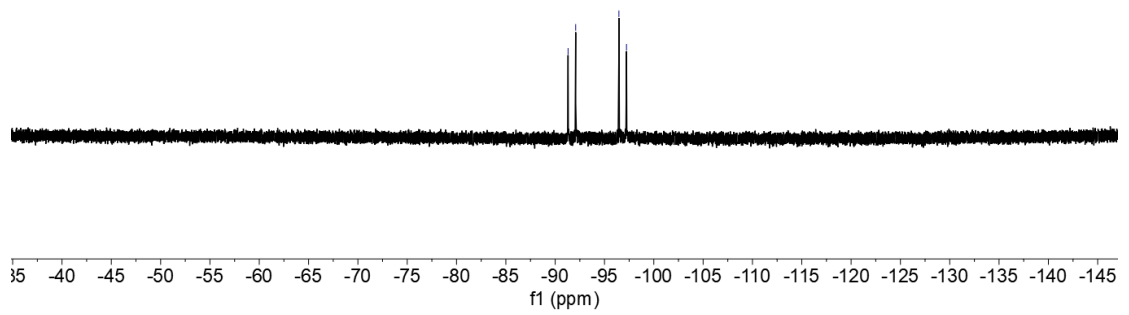

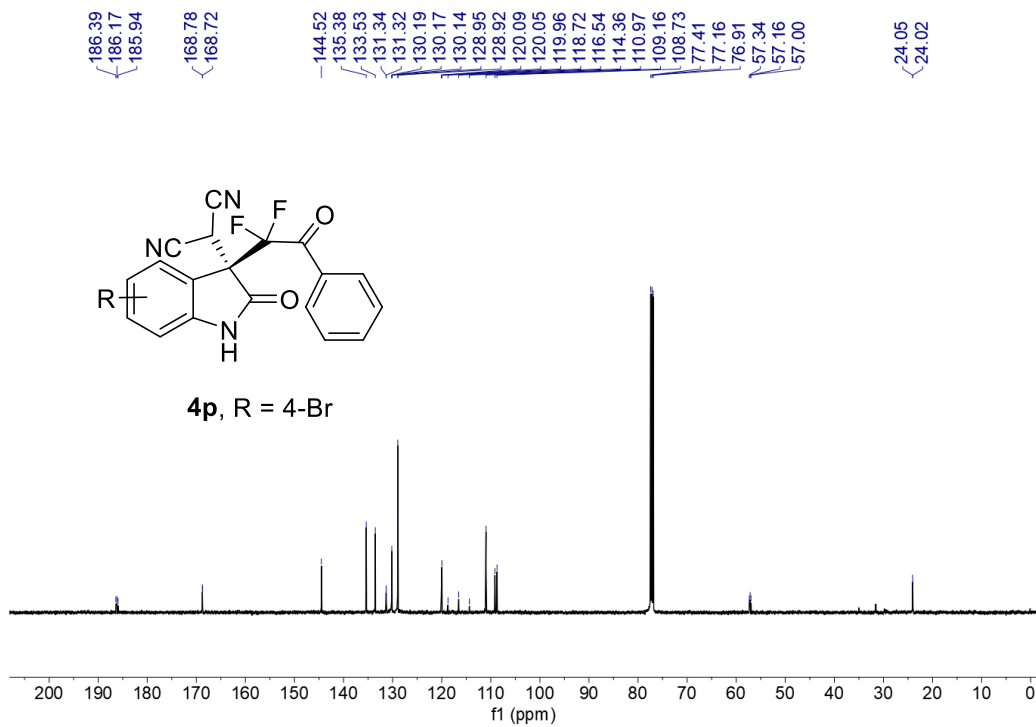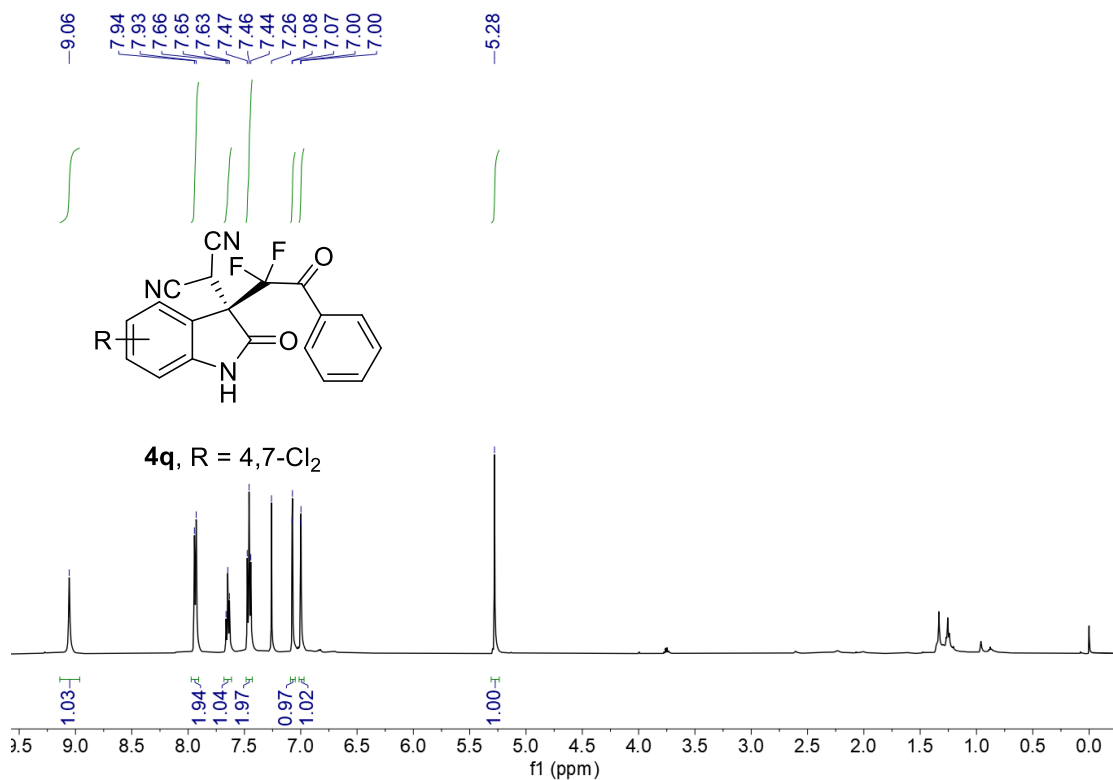



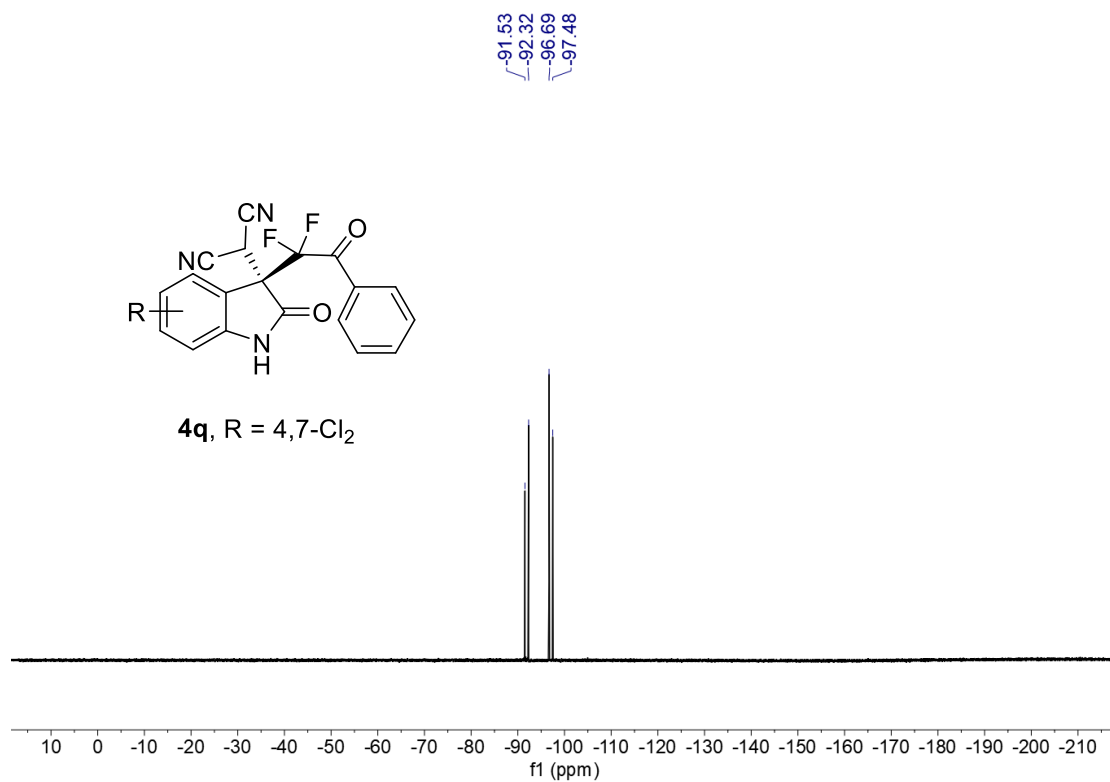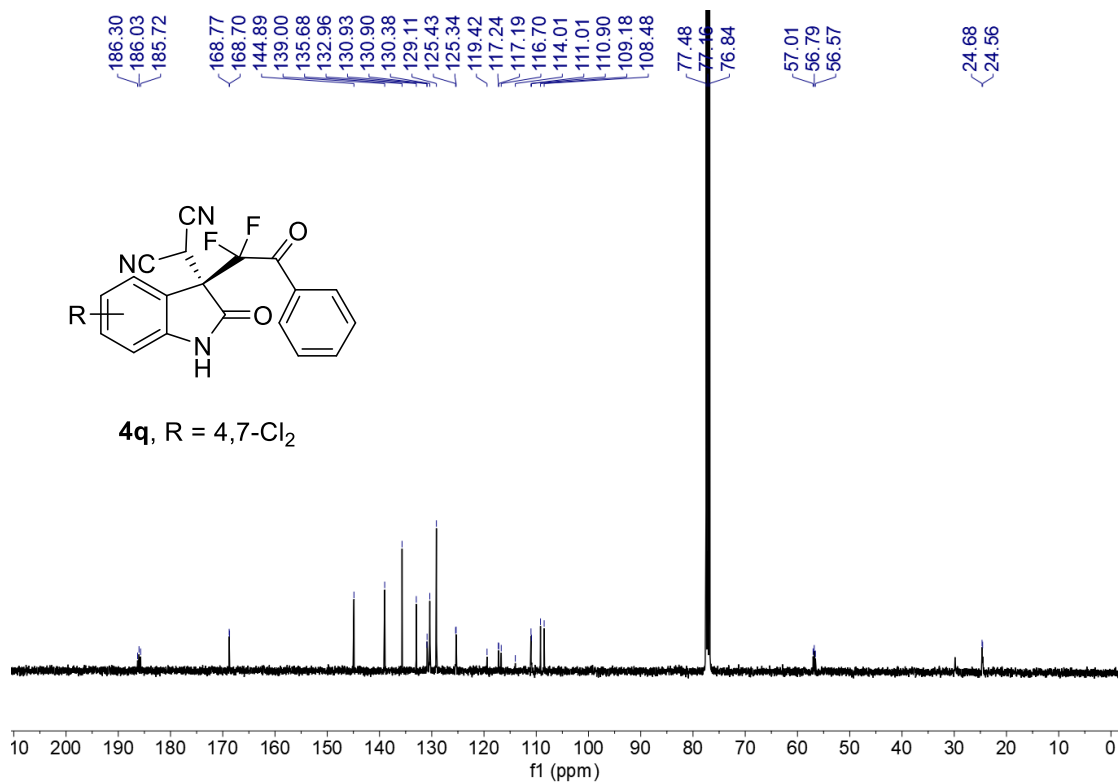

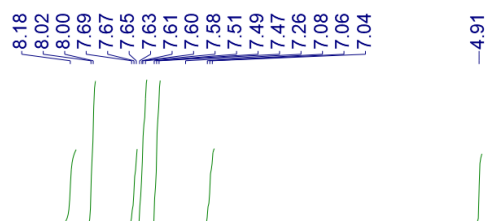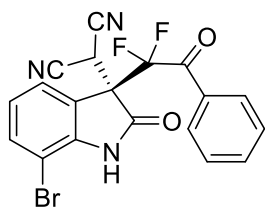

4r

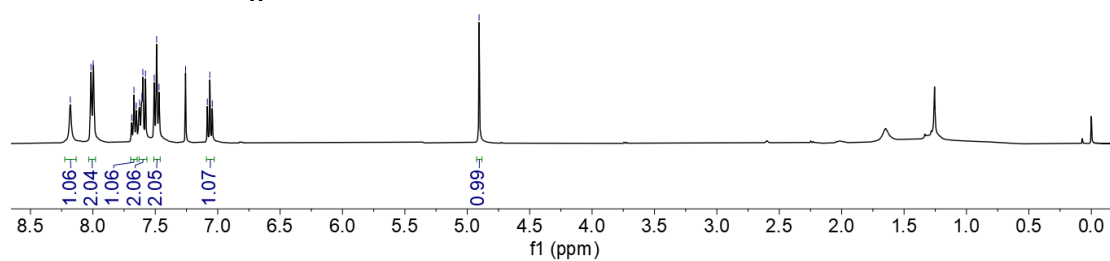

-96.37  
-97.20  
-98.37  
-99.19

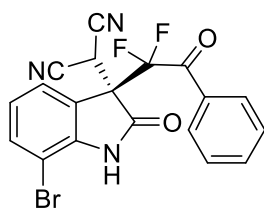

4r

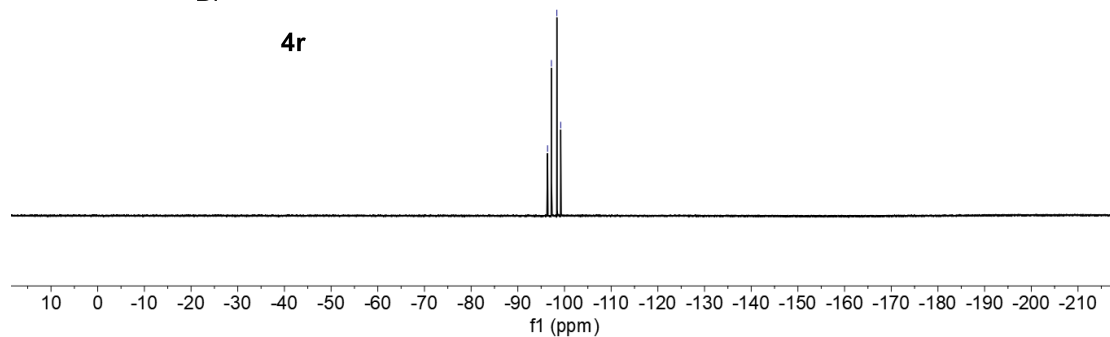

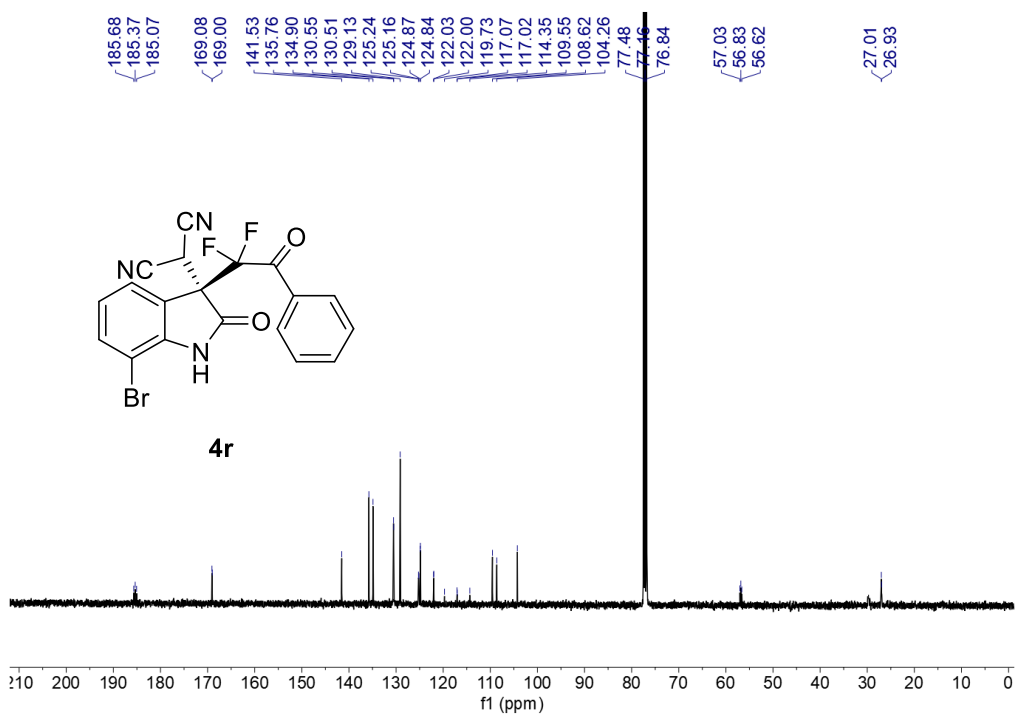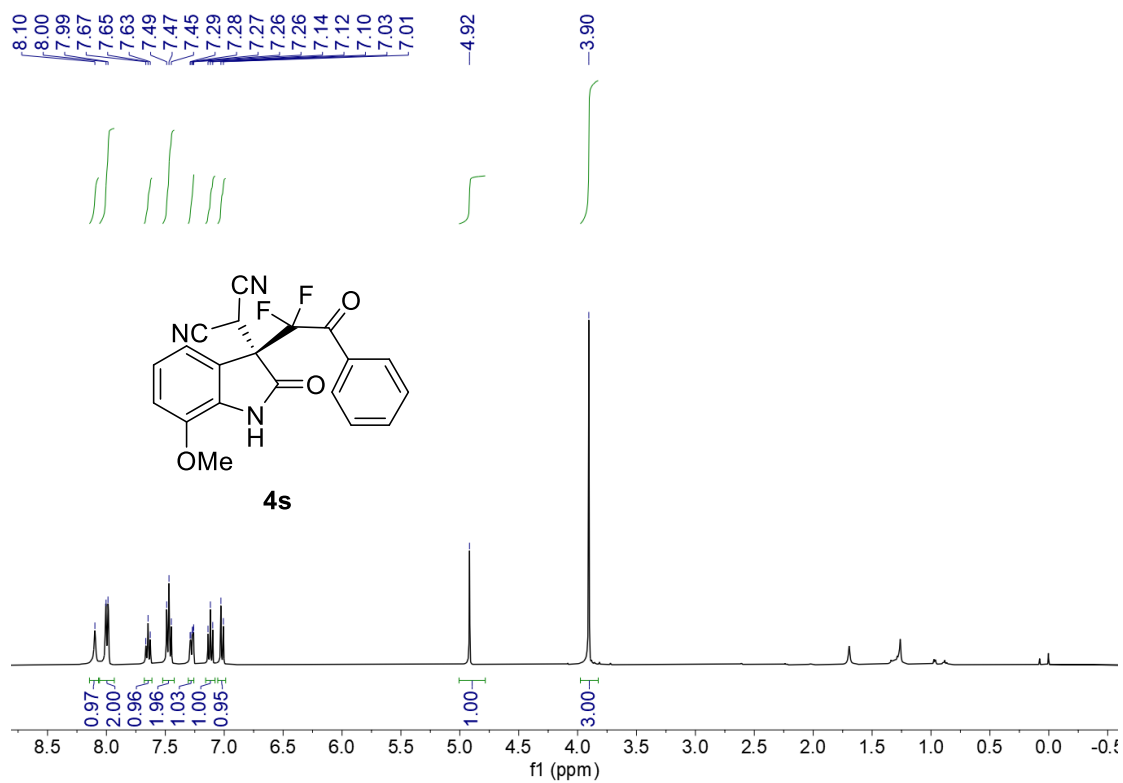

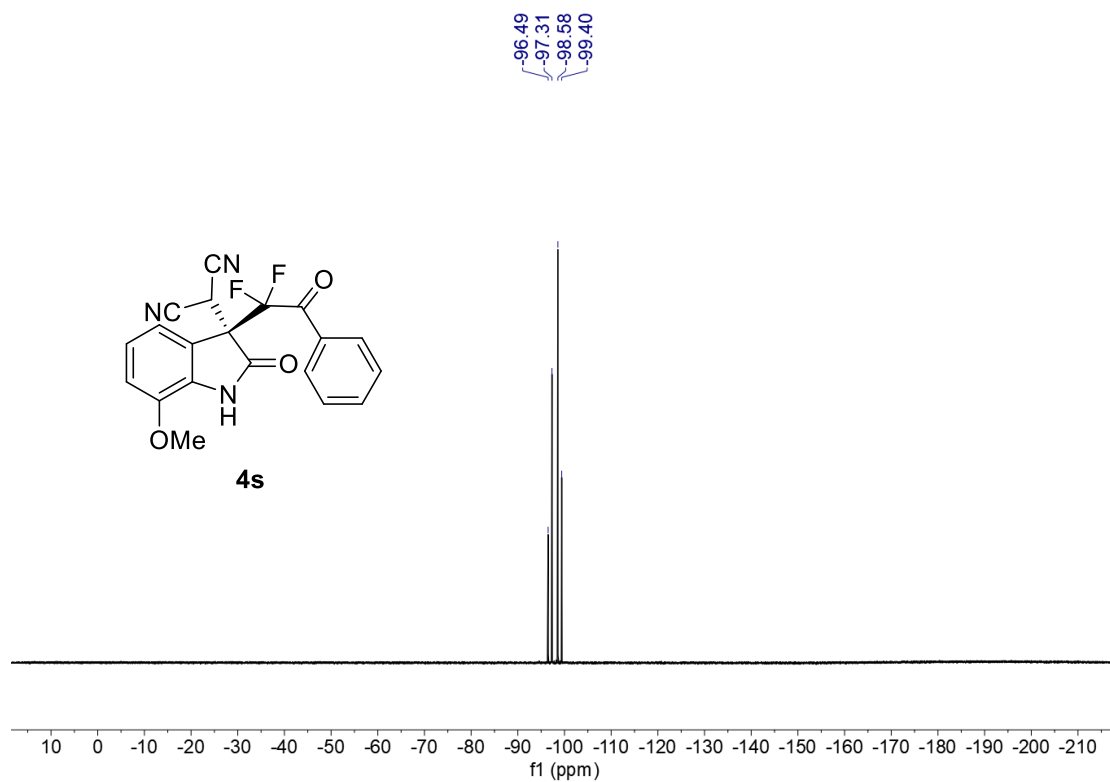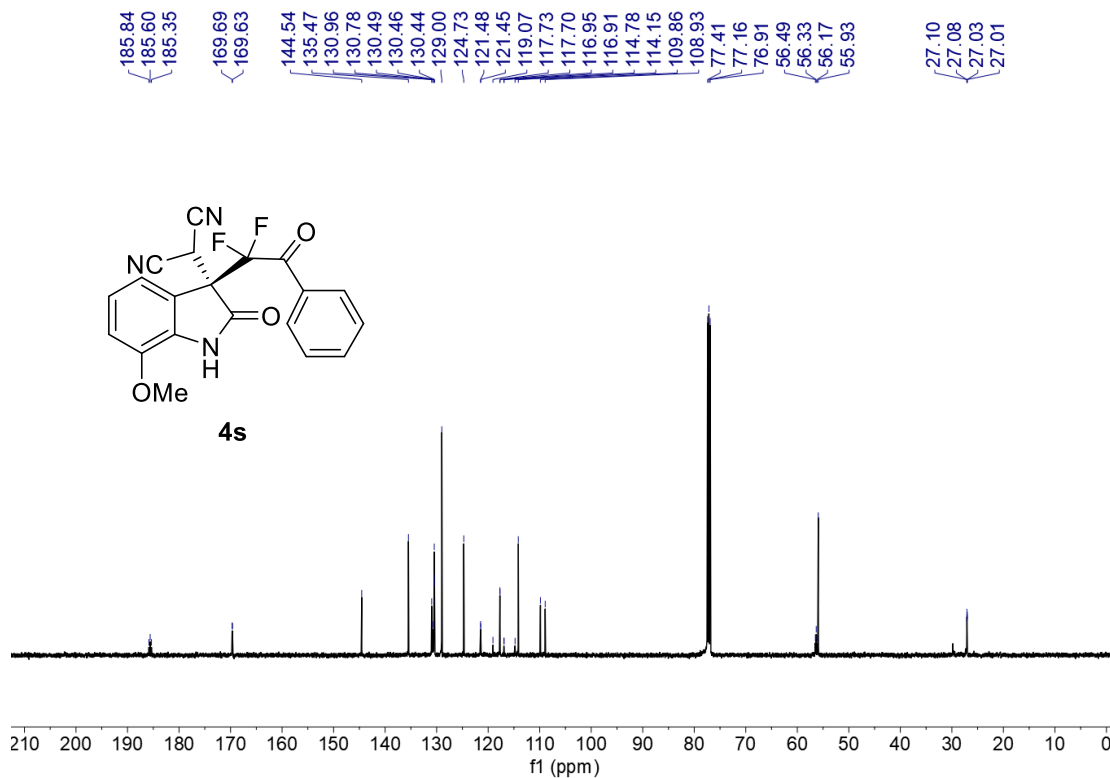

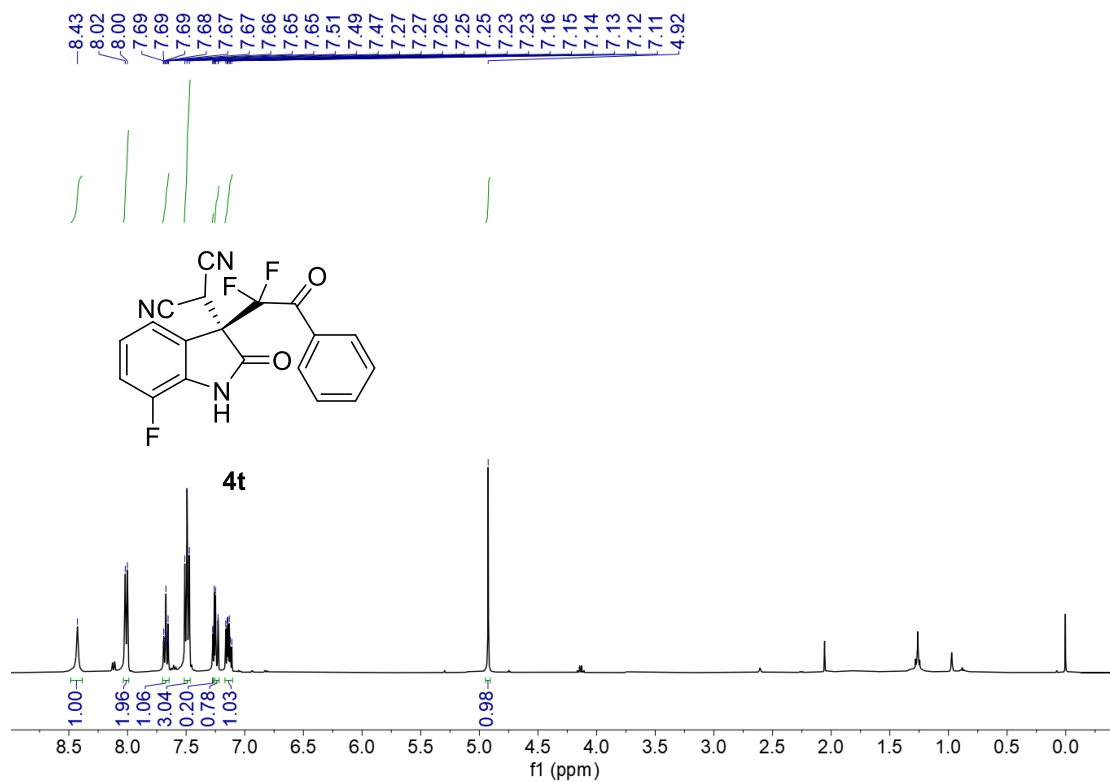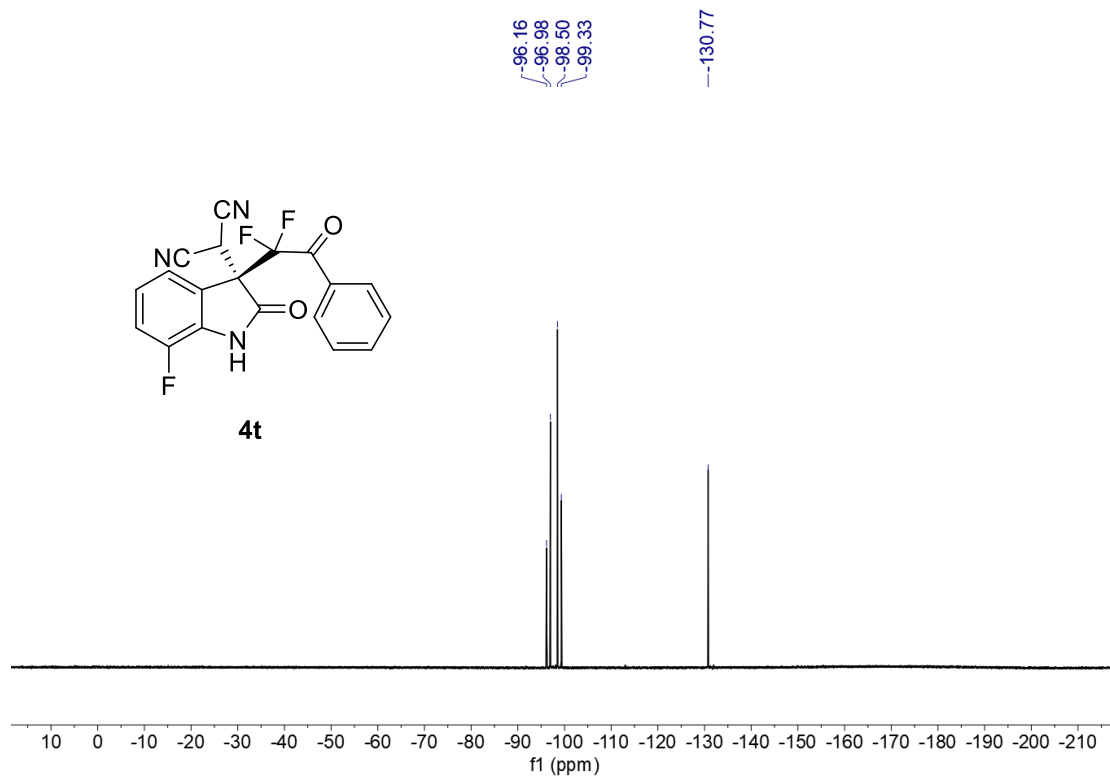

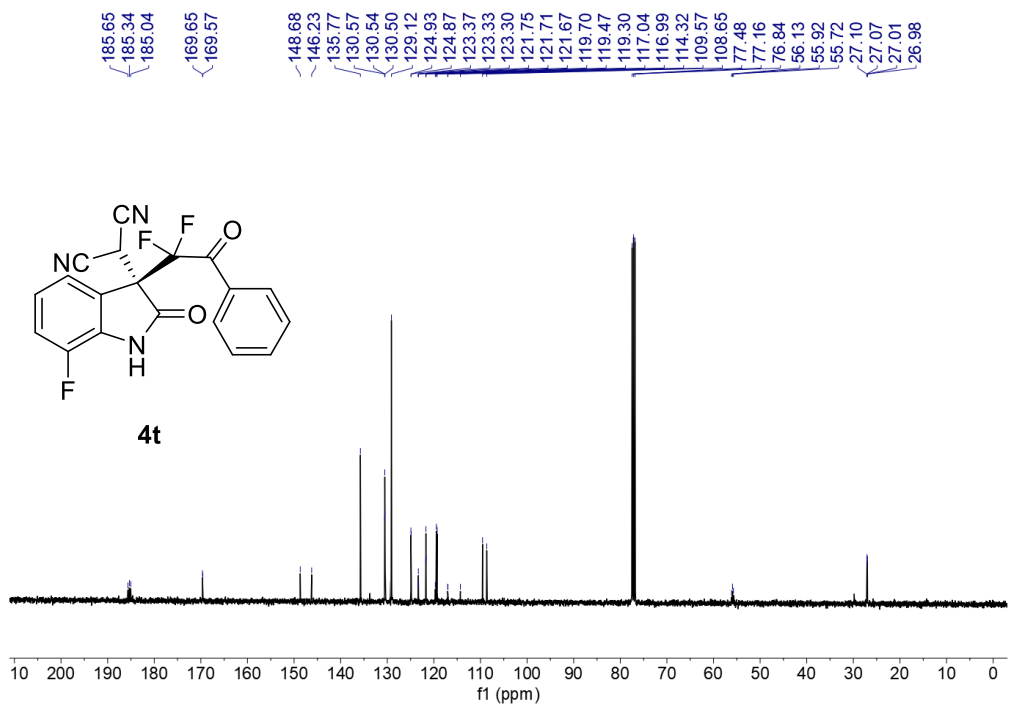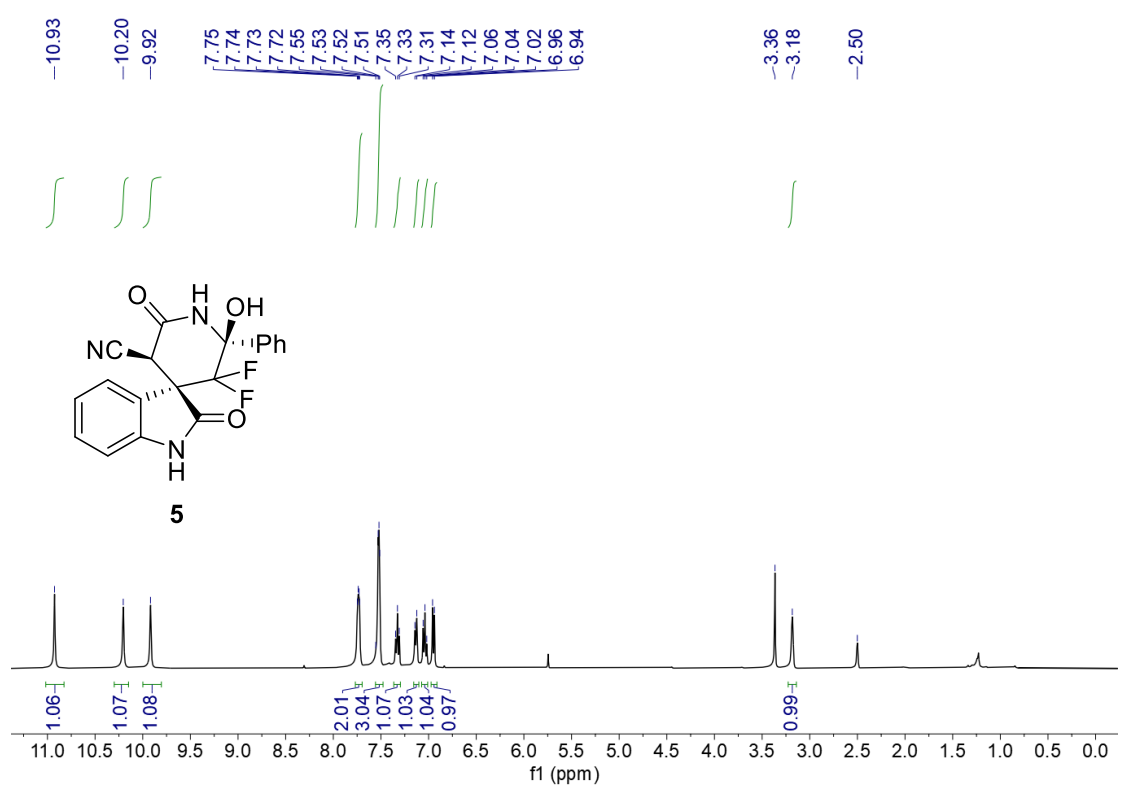

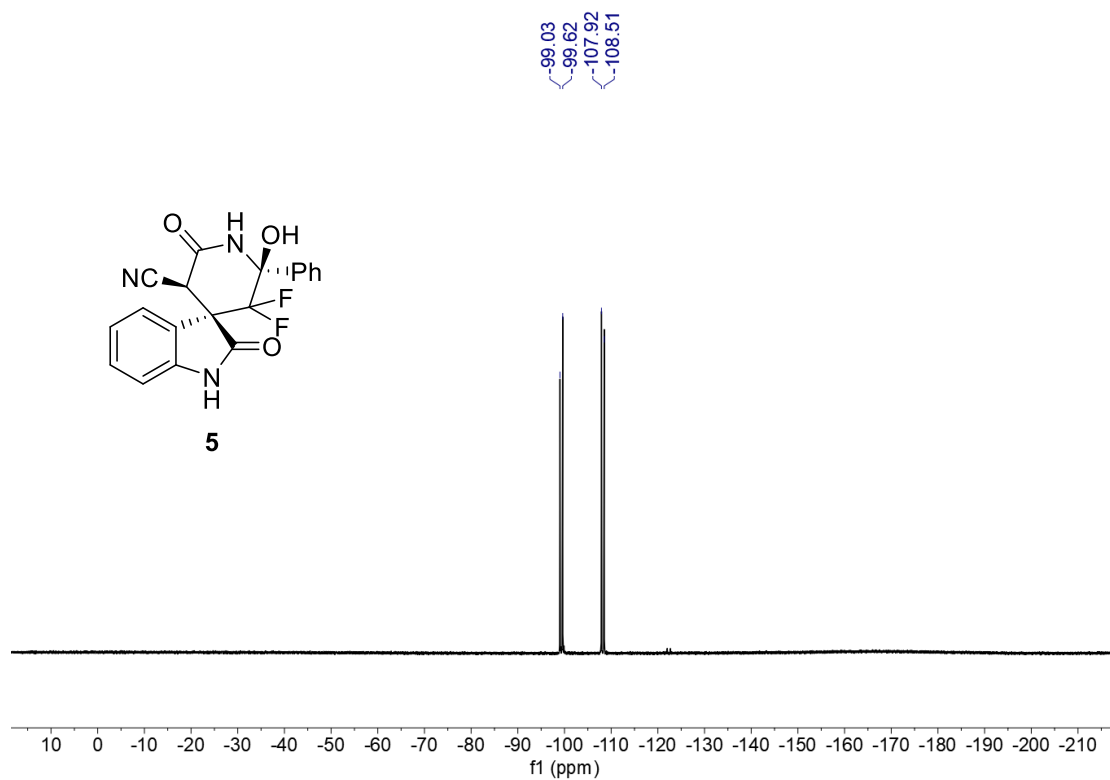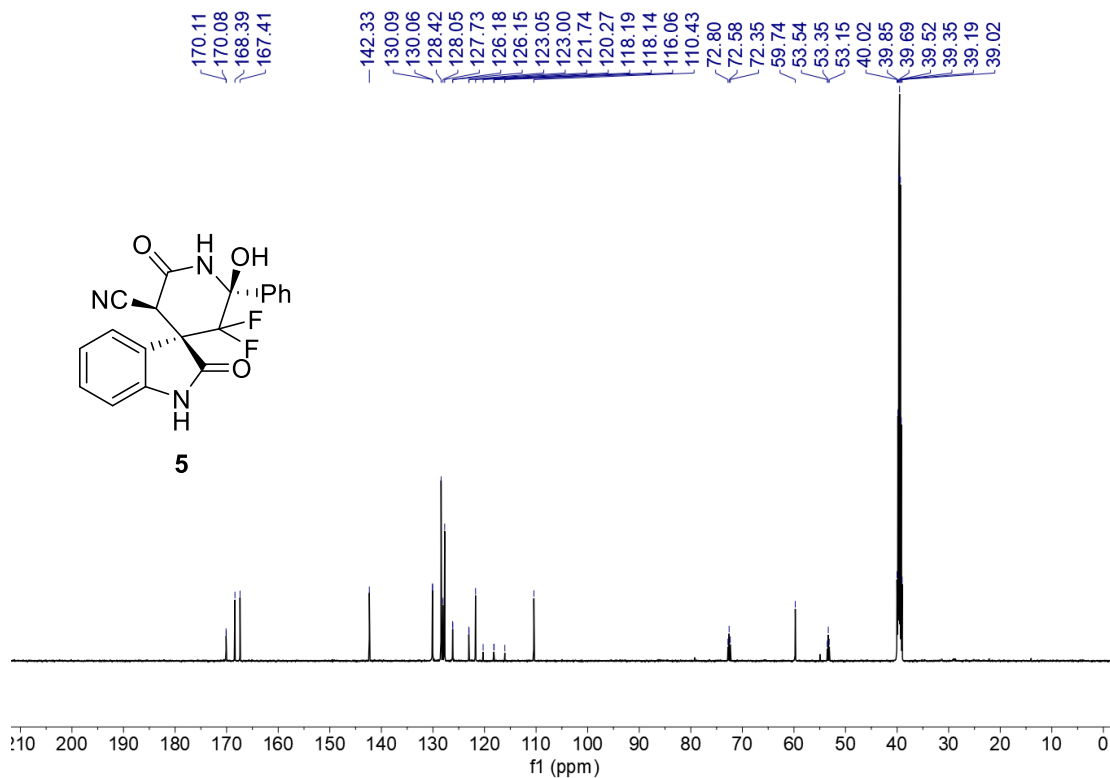

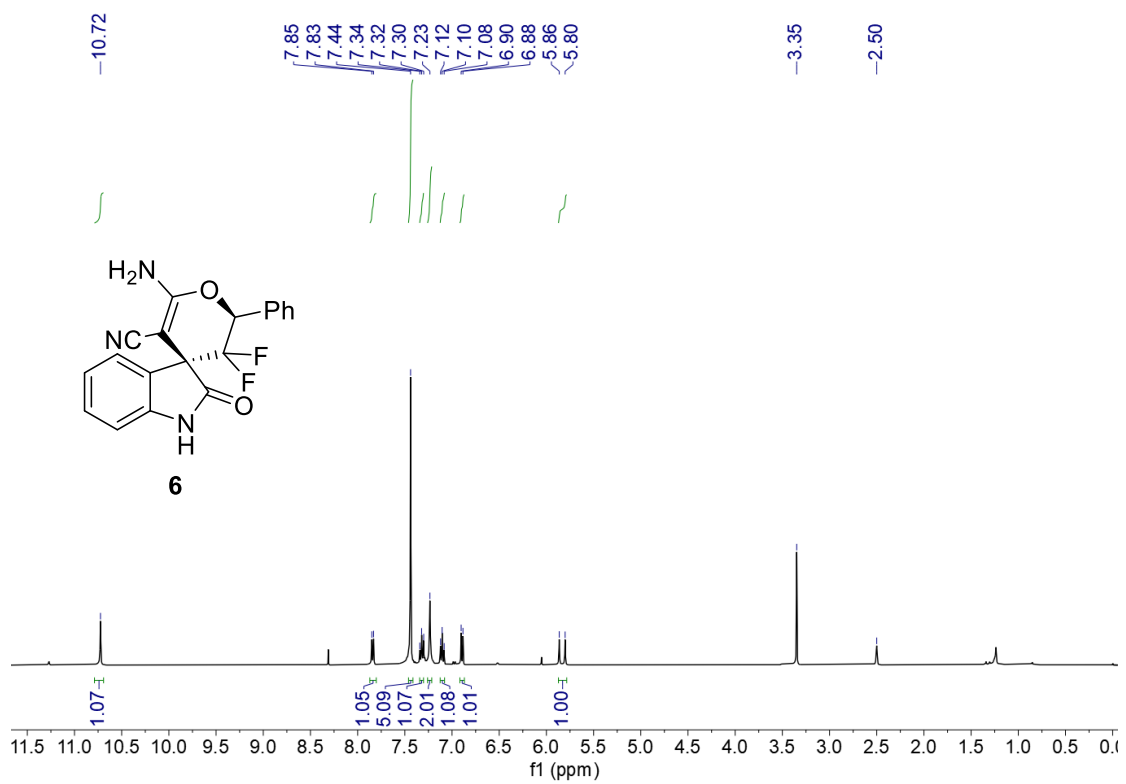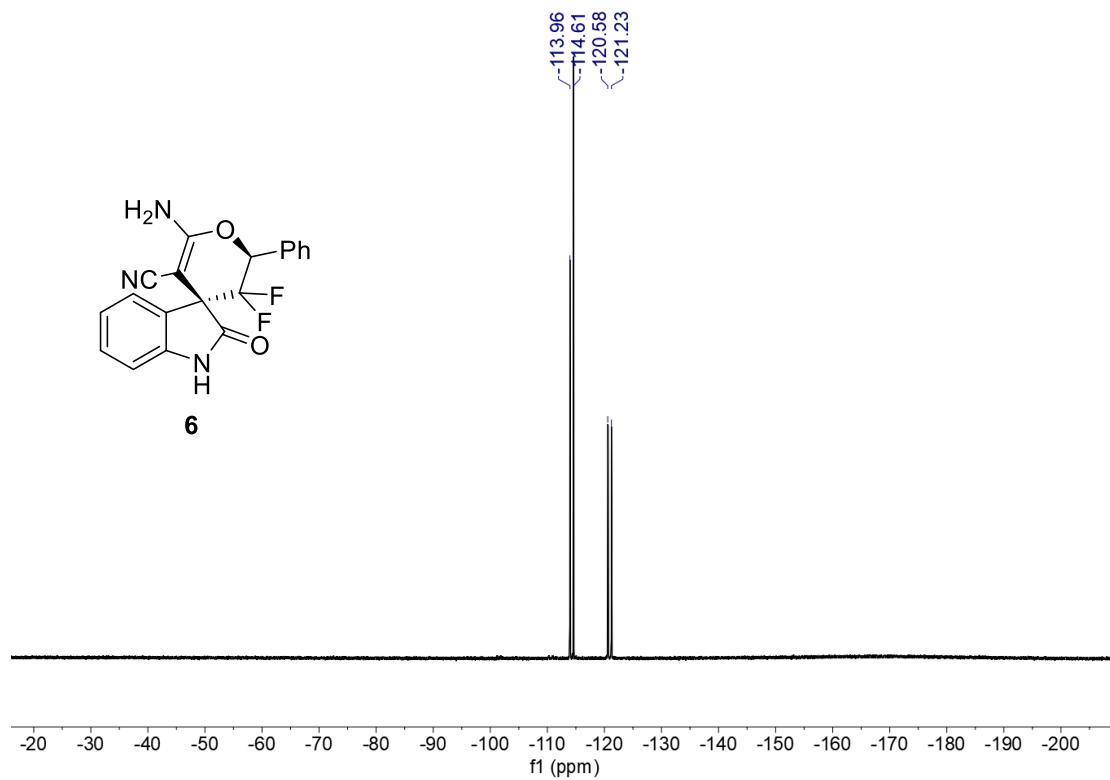



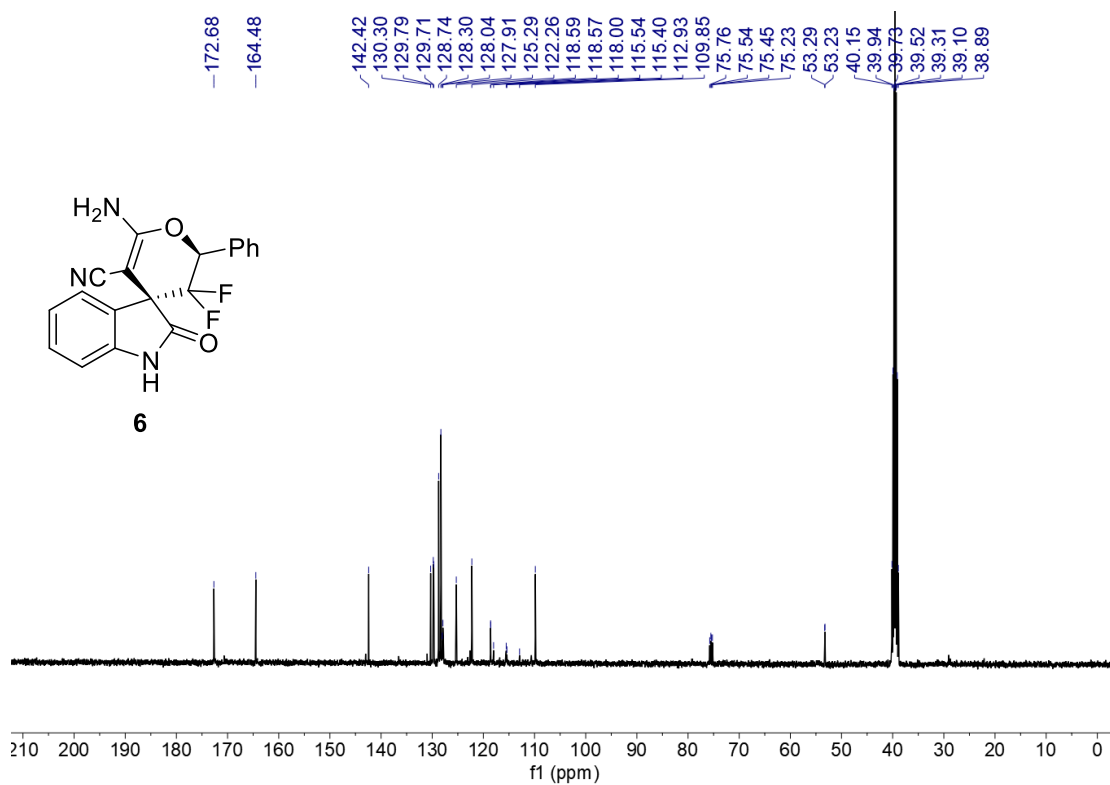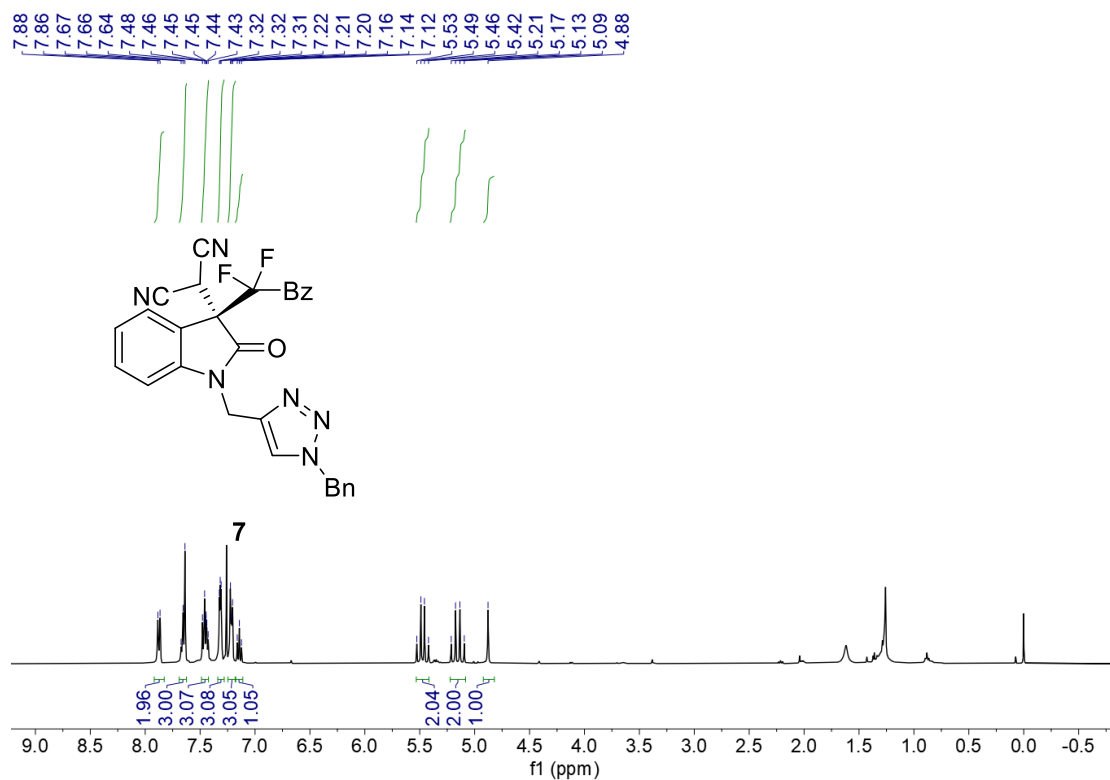

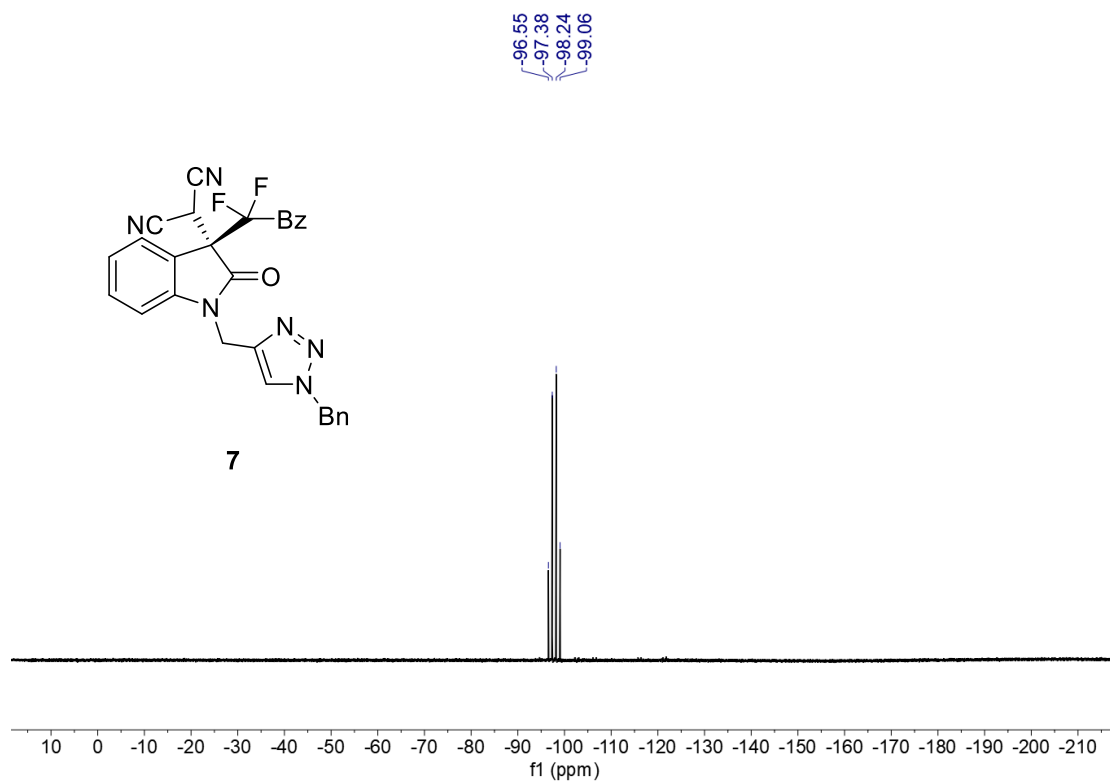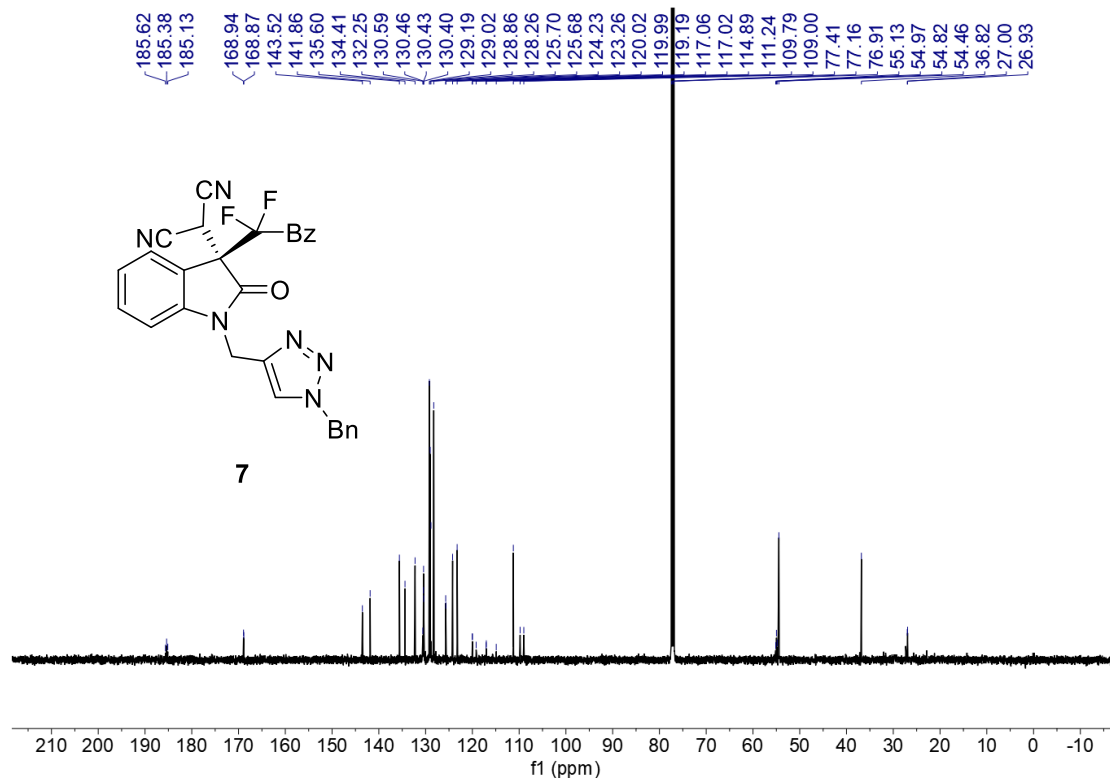

## 7. HPLC Analyses Figures of Compounds 3-6

Condition: Daicel Chiralpak IG-3,  $\lambda = 254$  nm, hexane/2-propanol = 85:15

flow rate = 1.0 mL/min

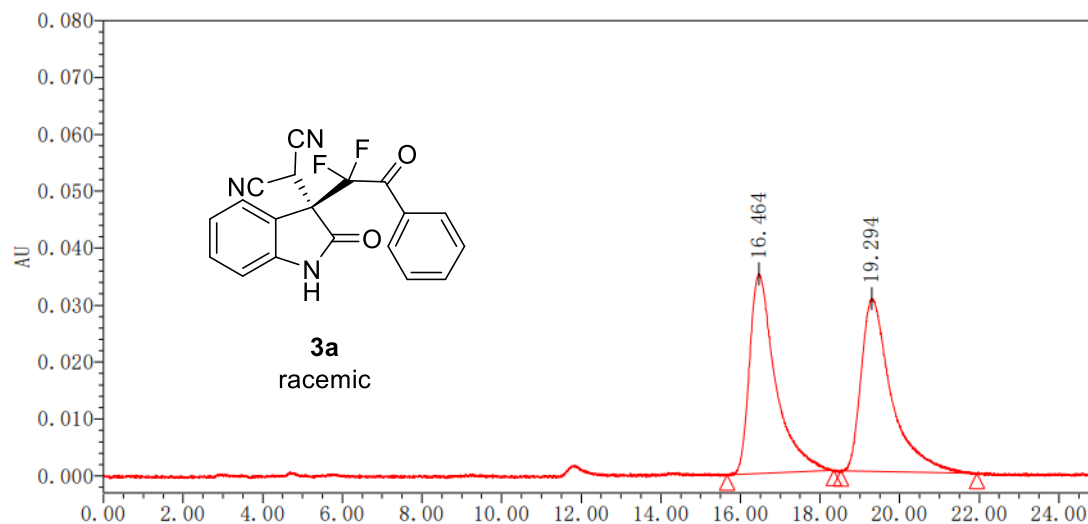

| Entry | RT min | Height mV | Area mV.sec | % Area % |
|-------|--------|-----------|-------------|----------|
| 1     | 16.464 | 35029     | 1591738     | 49.99    |
| 2     | 19.294 | 30312     | 1592458     | 50.01    |

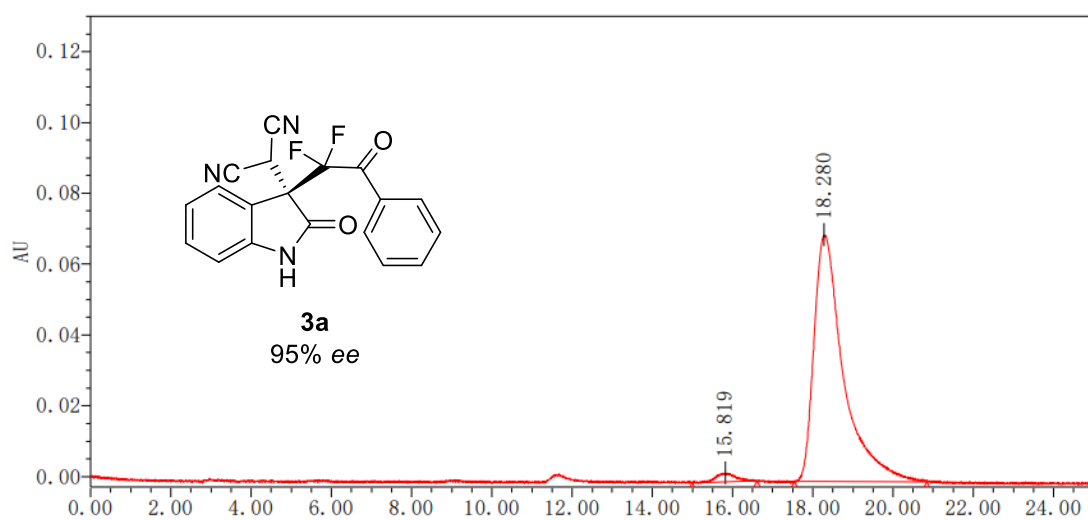

| Entry | RT min | Height mV | Area mV.sec | % Area % |
|-------|--------|-----------|-------------|----------|
| 1     | 15.819 | 2407      | 80515       | 2.23     |
| 2     | 18.280 | 69647     | 3537074     | 97.77    |

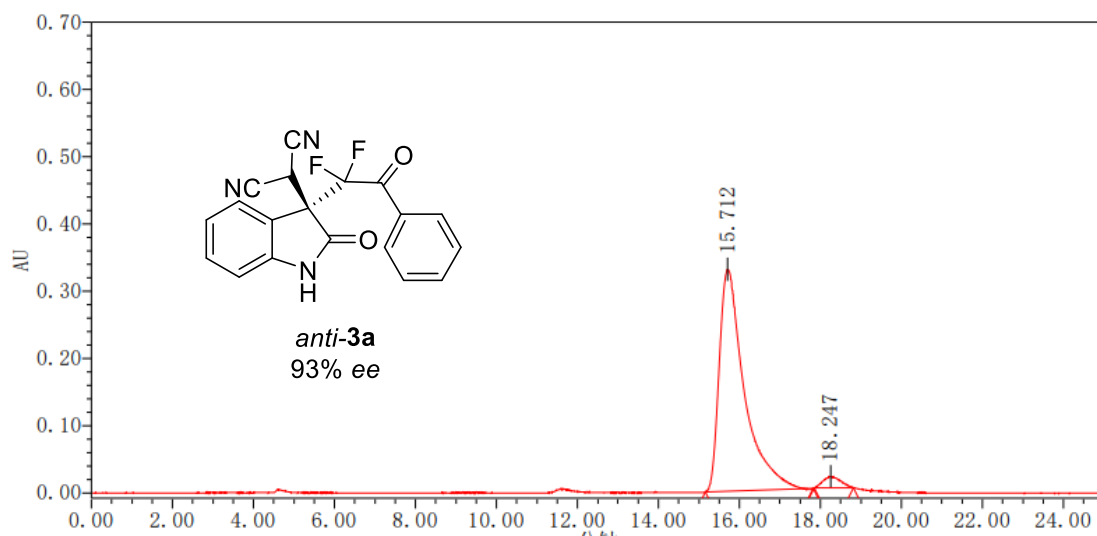

| Entry | RT min | Height mV | Area mV.sec | % Area % |
|-------|--------|-----------|-------------|----------|
| 1     | 15.712 | 330115    | 14218255    | 96.59    |
| 2     | 18.247 | 16318     | 501727      | 3.41     |

Condition: Daicel Chiralpak IG-3 ,  $\lambda = 254$  nm, hexane/2-propanol = 83:17

flow rate = 1.0 mL/min

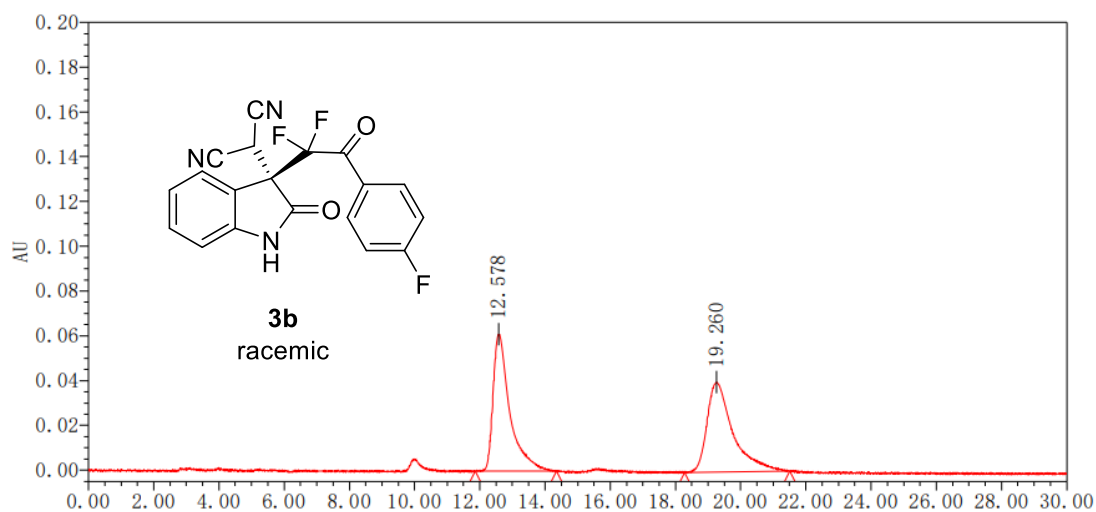

| Entry | RT min | Height mV | Area mV.sec | % Area % |
|-------|--------|-----------|-------------|----------|
| 1     | 12.578 | 61106     | 2173851     | 49.68    |
| 2     | 19.260 | 40121     | 2202211     | 50.32    |

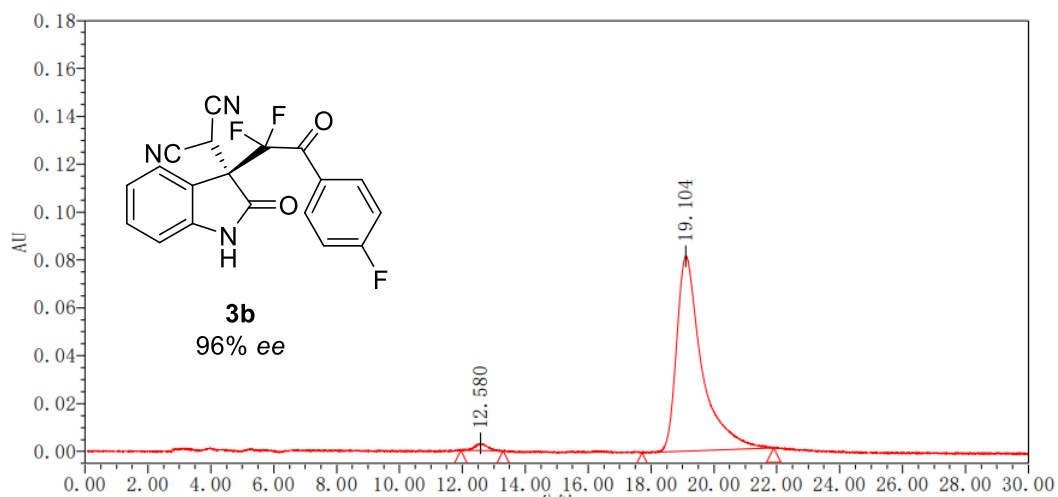

| Entry | RT min | Height mV | Area mV.sec | % Area % |
|-------|--------|-----------|-------------|----------|
| 1     | 12.580 | 2959      | 86091       | 1.86     |
| 2     | 19.104 | 81365     | 4532567     | 98.14    |

Condition: Daicel Chiralpak AD-H,  $\lambda = 254$  nm, hexane/2-propanol = 80:20

flow rate = 1.0 mL/min

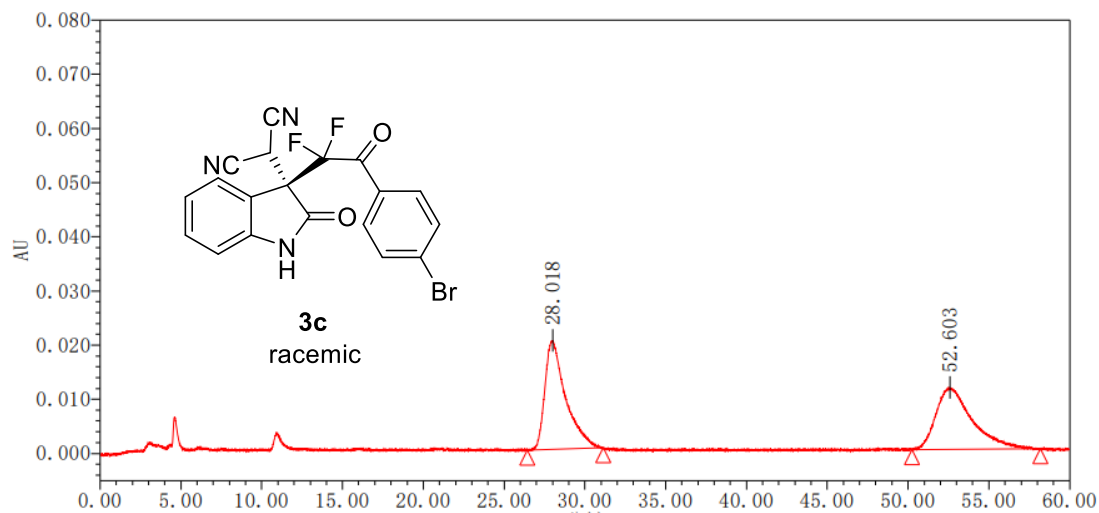

| Entry | RT min | Height mV | Area mV.sec | % Area % |
|-------|--------|-----------|-------------|----------|
| 1     | 28.018 | 20055     | 1792135     | 50.49    |
| 2     | 52.603 | 11420     | 1757506     | 49.51    |

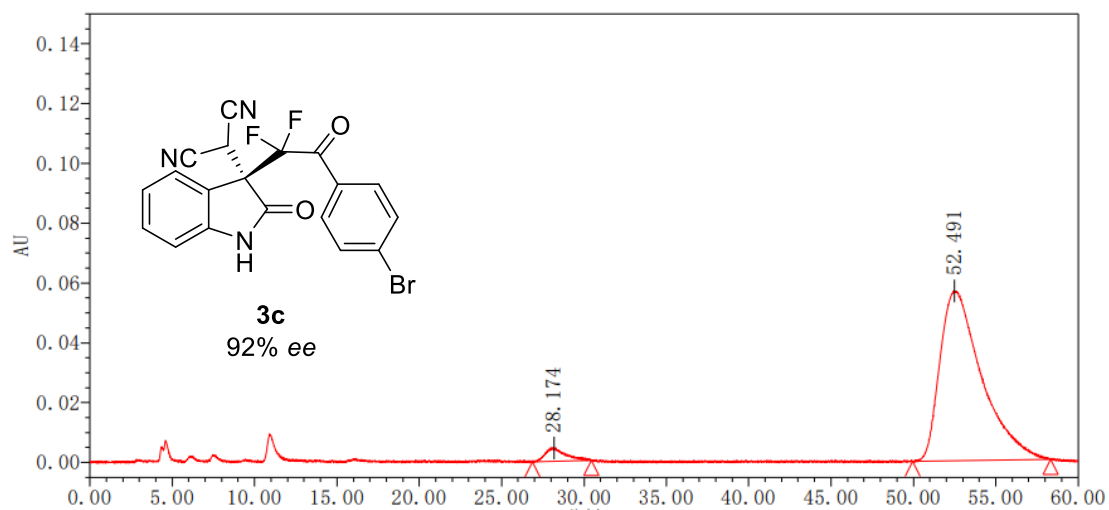

| Entry | RT min | Height mV | Area mV.sec | % Area % |
|-------|--------|-----------|-------------|----------|
| 1     | 28.174 | 4380      | 373068      | 3.60     |
| 2     | 52.491 | 56795     | 9985564     | 96.40    |

Condition: Daicel Chiralpak AD-H,  $\lambda = 254 \text{ nm}$ , hexane/2-propanol = 80:20

flow rate = 1.0 mL/min

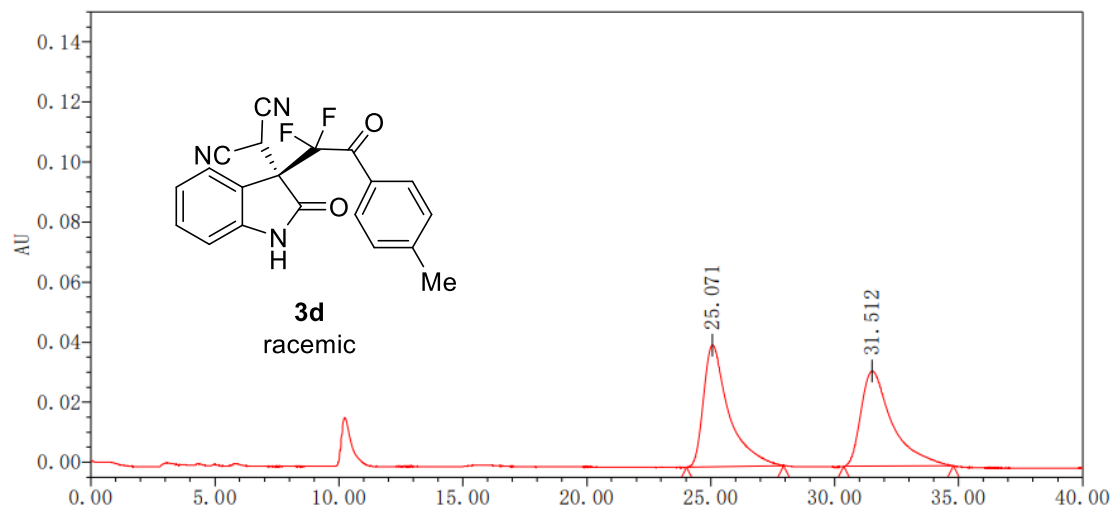

| Entry | RT min | Height mV | Area mV.sec | % Area % |
|-------|--------|-----------|-------------|----------|
| 1     | 25.071 | 40534     | 2876282     | 50.90    |
| 2     | 31.512 | 31714     | 2774801     | 49.10    |

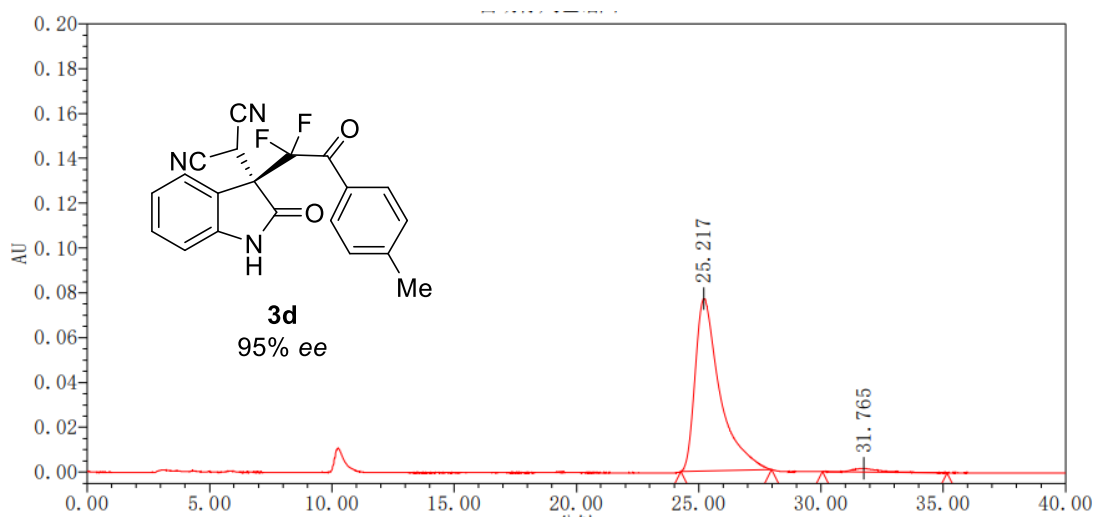

| Entry | RT min | Height mV | Area mV.sec | % Area % |
|-------|--------|-----------|-------------|----------|
| 1     | 25.217 | 77127     | 5449420     | 97.81    |
| 2     | 31.765 | 1584      | 122007      | 2.19     |

Condition: Daicel Chiralpak AD-H,  $\lambda = 254$  nm, hexane/2-propanol = 75:25

flow rate = 1.0 mL/min

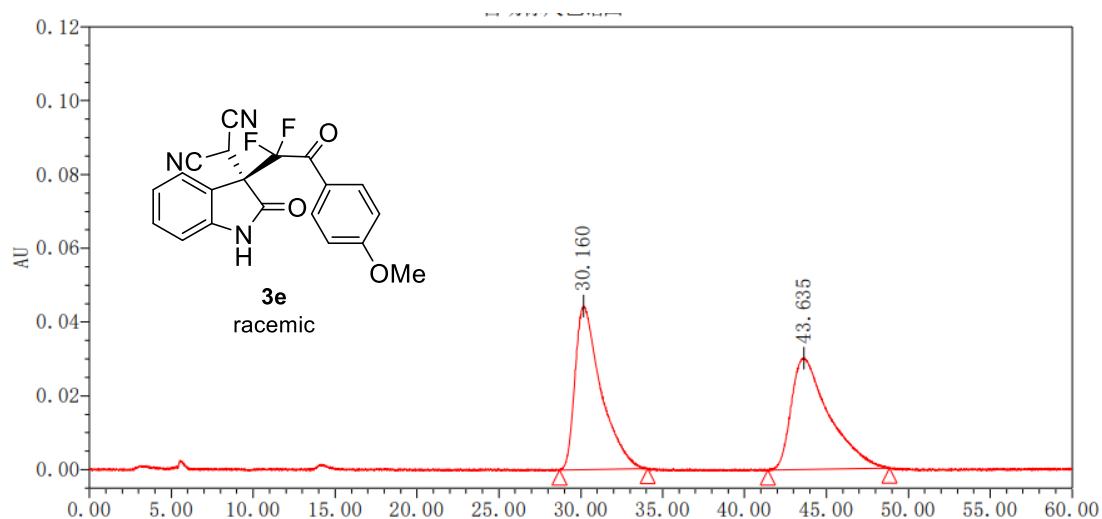

| Entry | RT min | Height mV | Area mV.sec | % Area % |
|-------|--------|-----------|-------------|----------|
| 1     | 30.160 | 44310     | 4892306     | 50.32    |
| 2     | 43.635 | 30179     | 4830046     | 49.68    |

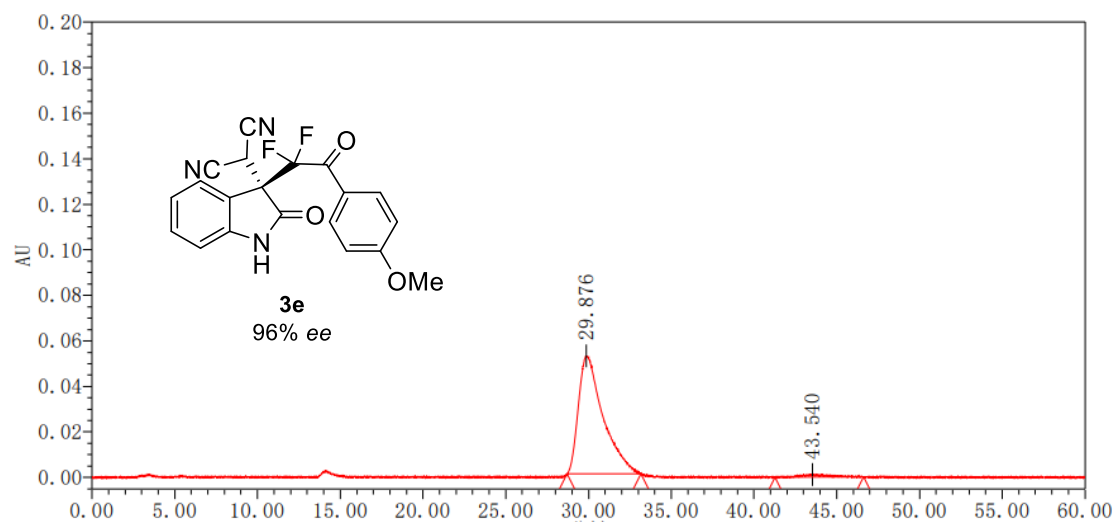

| Entry | RT min | Height mV | Area mV.sec | % Area % |
|-------|--------|-----------|-------------|----------|
| 1     | 29.876 | 51792     | 5363294     | 98.01    |
| 2     | 43.540 | 1045      | 108763      | 1.99     |



Condition: Daicel Chiralpak AD-H,  $\lambda = 254 \text{ nm}$ , hexane/2-propanol = 78:22

flow rate = 1.0 mL/min

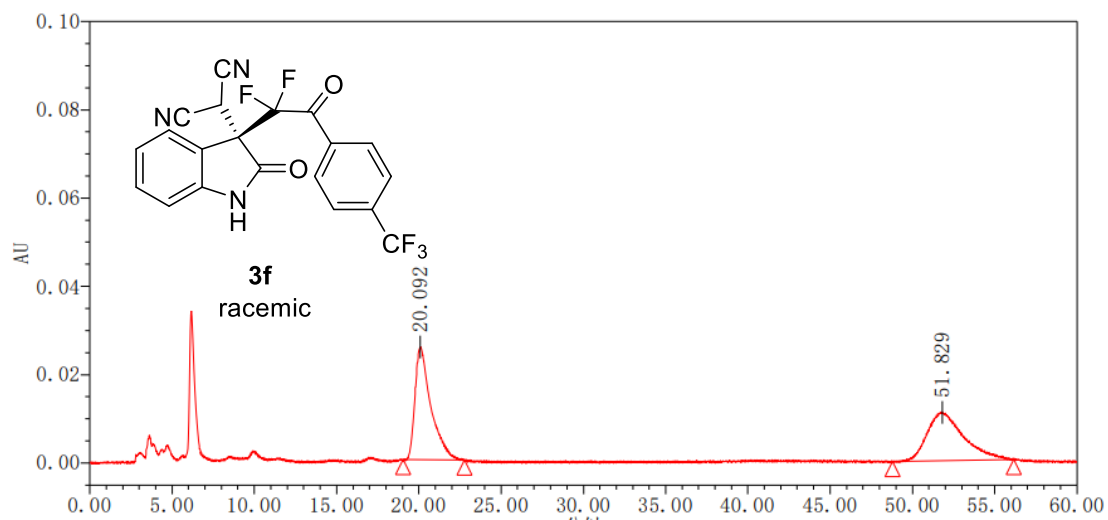

| Entry | RT min | Height mV | Area mV.sec | % Area % |
|-------|--------|-----------|-------------|----------|
| 1     | 20.092 | 25577     | 1735714     | 50.78    |
| 2     | 51.829 | 10885     | 1682169     | 49.22    |

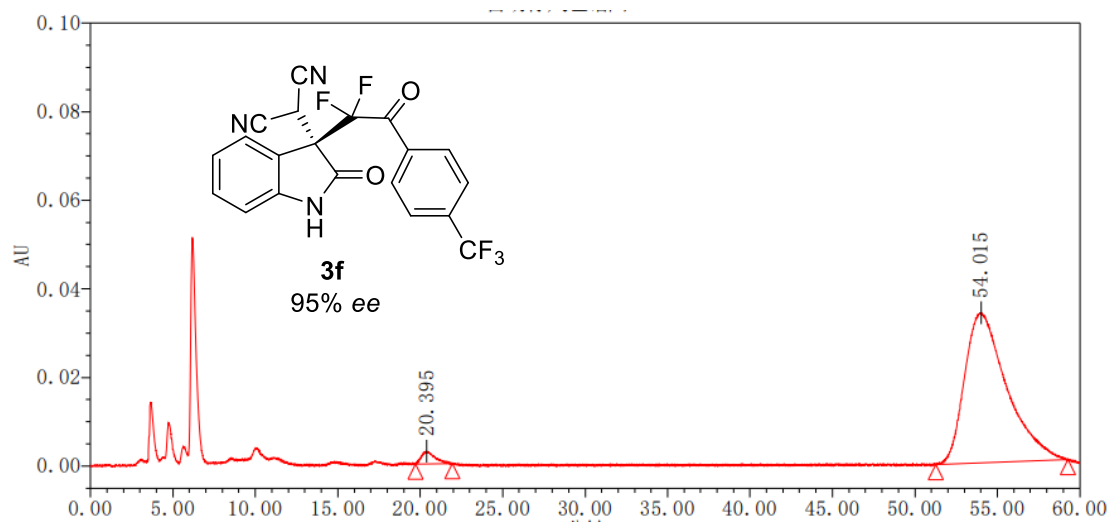

| Entry | RT min | Height mV | Area mV.sec | % Area % |
|-------|--------|-----------|-------------|----------|
| 1     | 20.395 | 2810      | 155333      | 2.52     |
| 2     | 54.015 | 33838     | 6003845     | 97.48    |

Condition: Daicel Chiralpak AD-H,  $\lambda = 254 \text{ nm}$ , hexane/2-propanol = 80:20

flow rate = 1.0 mL/min

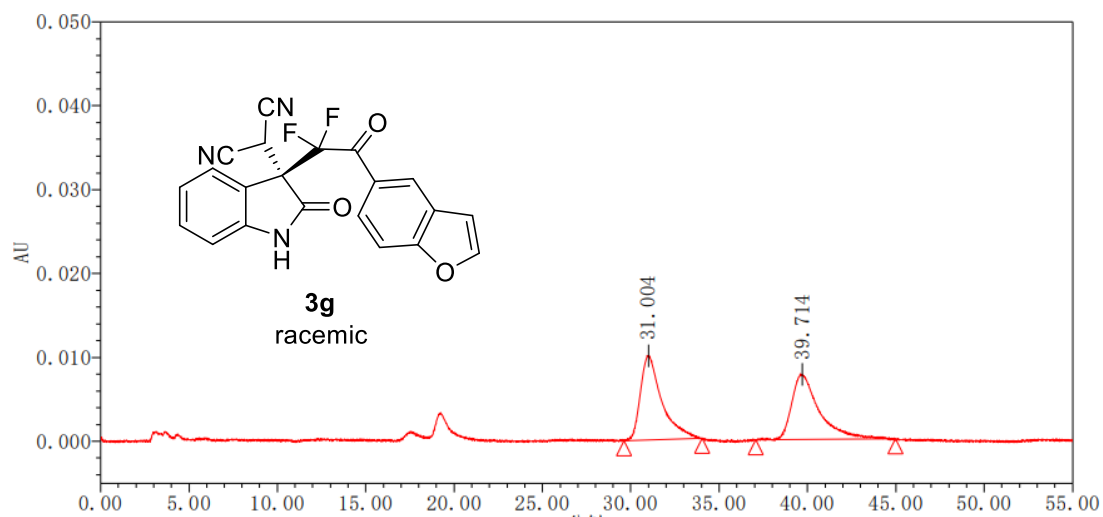

| Entry | RT min | Height mV | Area mV.sec | % Area % |
|-------|--------|-----------|-------------|----------|
| 1     | 31.004 | 10046     | 844798      | 49.96    |
| 2     | 39.714 | 7767      | 846218      | 50.04    |

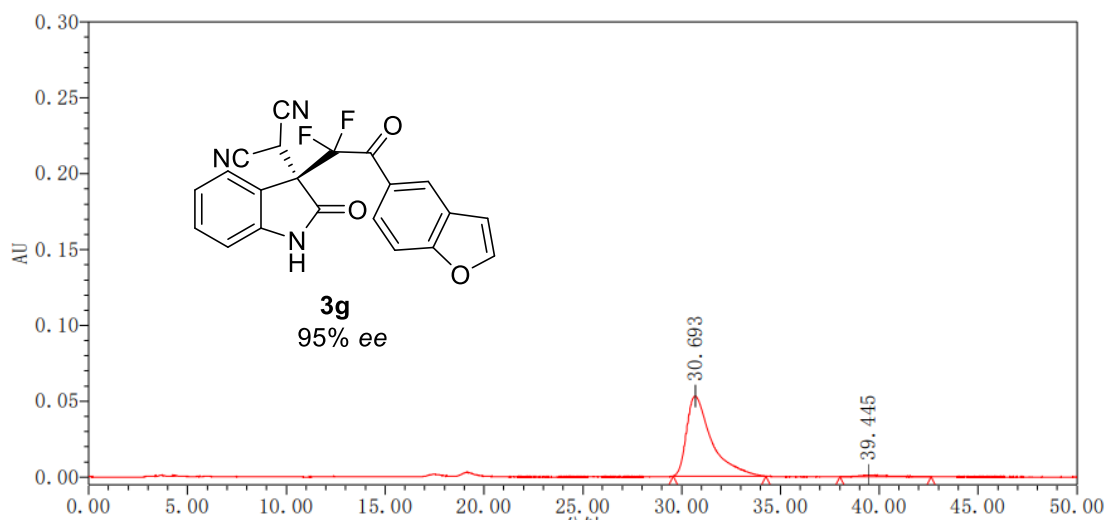

| Entry | RT min | Height mV | Area mV.sec | % Area % |
|-------|--------|-----------|-------------|----------|
| 1     | 30.693 | 52679     | 4621376     | 97.50    |
| 2     | 39.445 | 1092      | 118264      | 2.50     |

Condition: Daicel Chiralpak IG-3,  $\lambda = 254$  nm, hexane/2-propanol = 80:20

flow rate = 1.0 mL/min

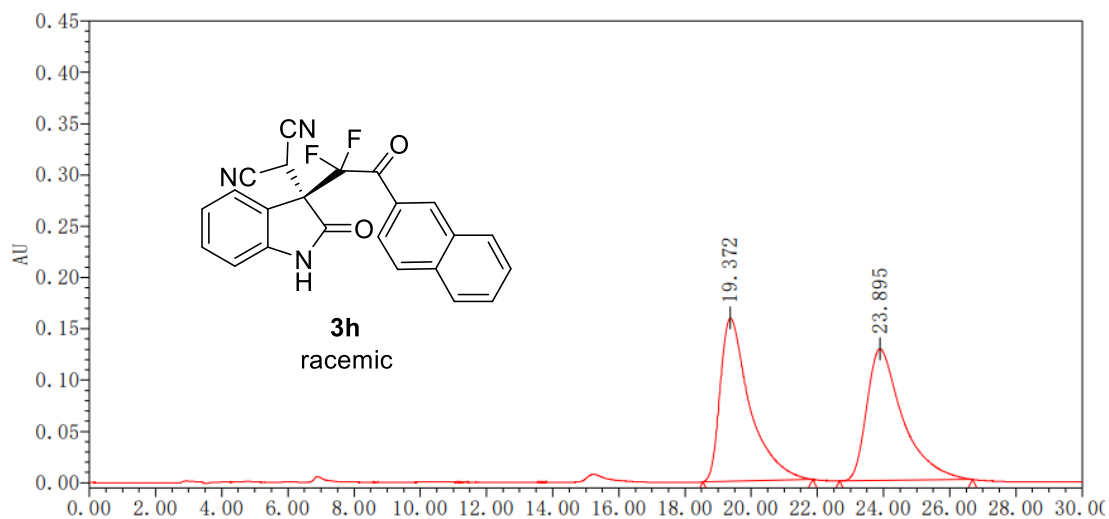

| Entry | RT min | Height mV | Area mV.sec | % Area % |
|-------|--------|-----------|-------------|----------|
| 1     | 19.372 | 159110    | 9874406     | 50.47    |
| 2     | 23.895 | 128427    | 9691539     | 49.53    |

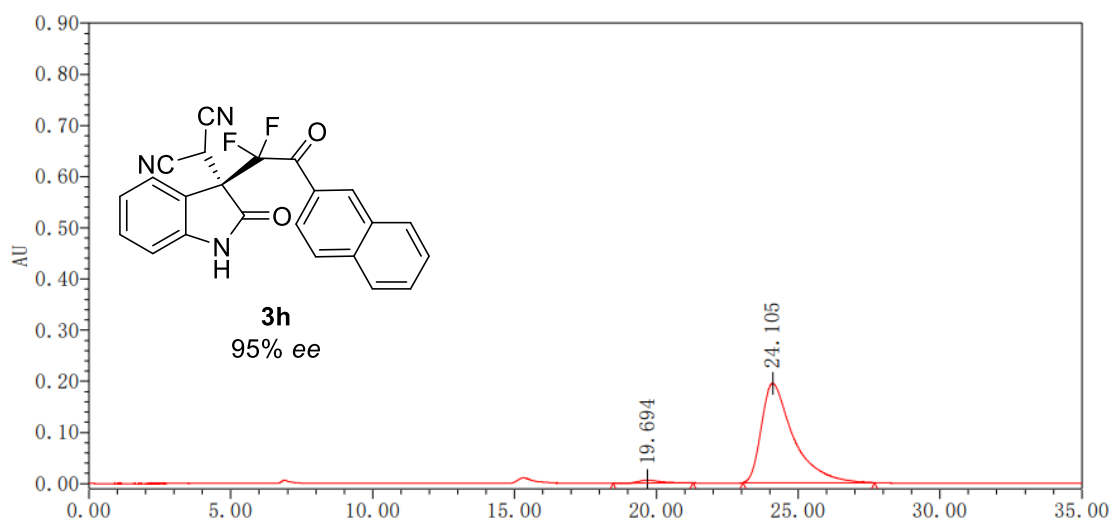

| Entry | RT min | Height mV | Area mV.sec | % Area % |
|-------|--------|-----------|-------------|----------|
| 1     | 19.694 | 5871      | 333258      | 2.15     |
| 2     | 24.105 | 193973    | 15161412    | 97.85    |

Condition: Daicel Chiralpak IG-3,  $\lambda = 254$  nm, hexane/2-propanol = 87:13

flow rate = 1.0 mL/min

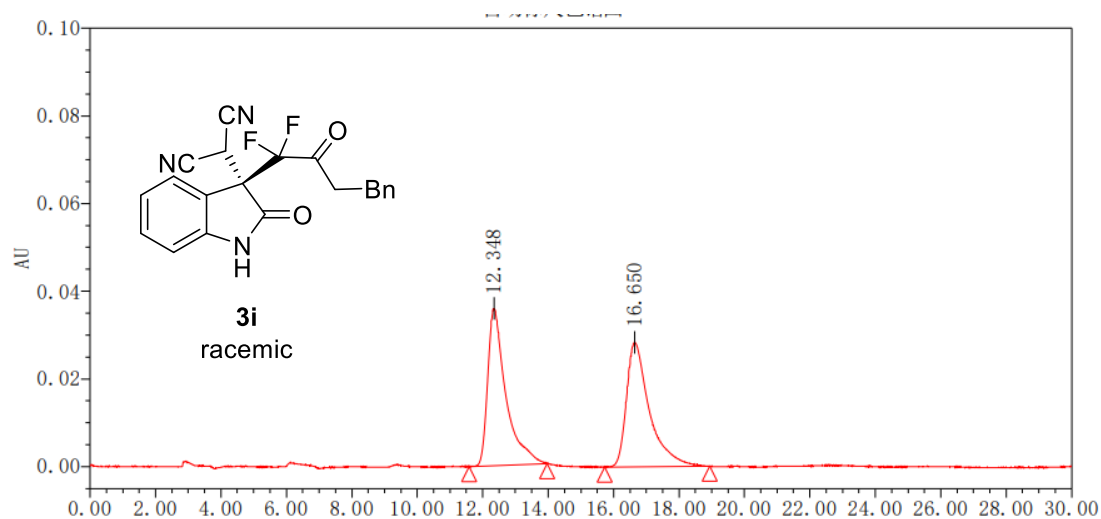

| Entry | RT min | Height mV | Area mV.sec | % Area % |
|-------|--------|-----------|-------------|----------|
| 1     | 12.348 | 35843     | 1388219     | 50.13    |
| 2     | 16.650 | 28390     | 1381288     | 49.87    |

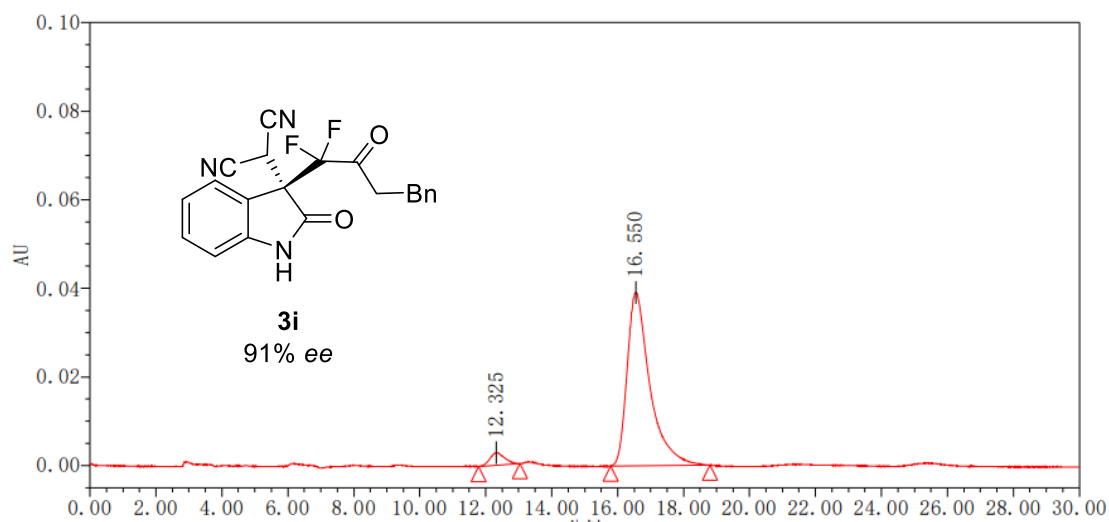

| Entry | RT min | Height mV | Area mV.sec | % Area % |
|-------|--------|-----------|-------------|----------|
| 1     | 12.325 | 2812      | 87029       | 4.42     |
| 2     | 16.550 | 39123     | 1880166     | 95.58    |

Condition: Daicel Chiralpak AD-H,  $\lambda = 254$  nm, hexane/2-propanol = 70:30

flow rate = 1.0 mL/min

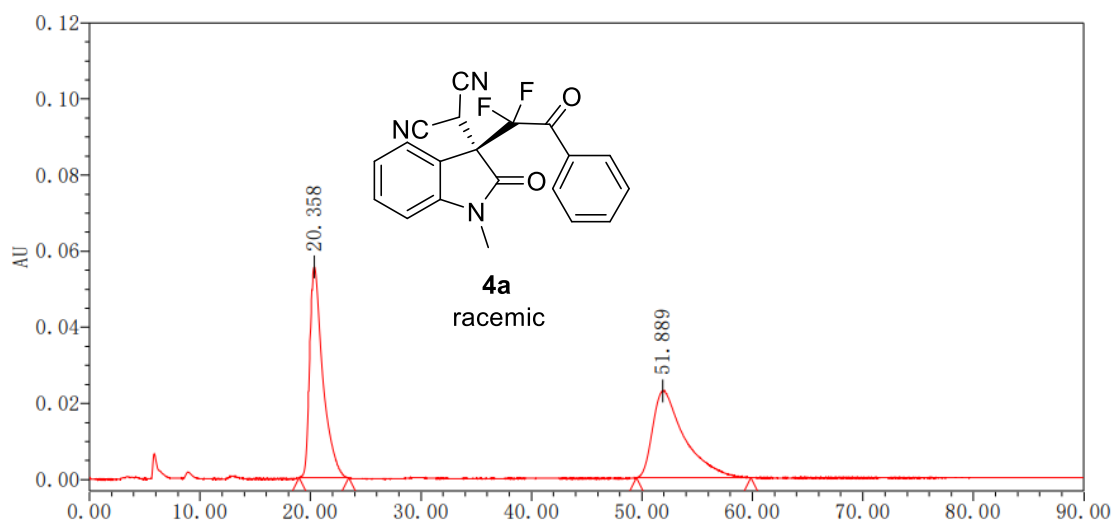

| Entry | RT min | Height mV | Area mV.sec | % Area % |
|-------|--------|-----------|-------------|----------|
| 1     | 20.358 | 55397     | 4607284     | 50.36    |
| 2     | 51.889 | 22874     | 4541561     | 49.64    |

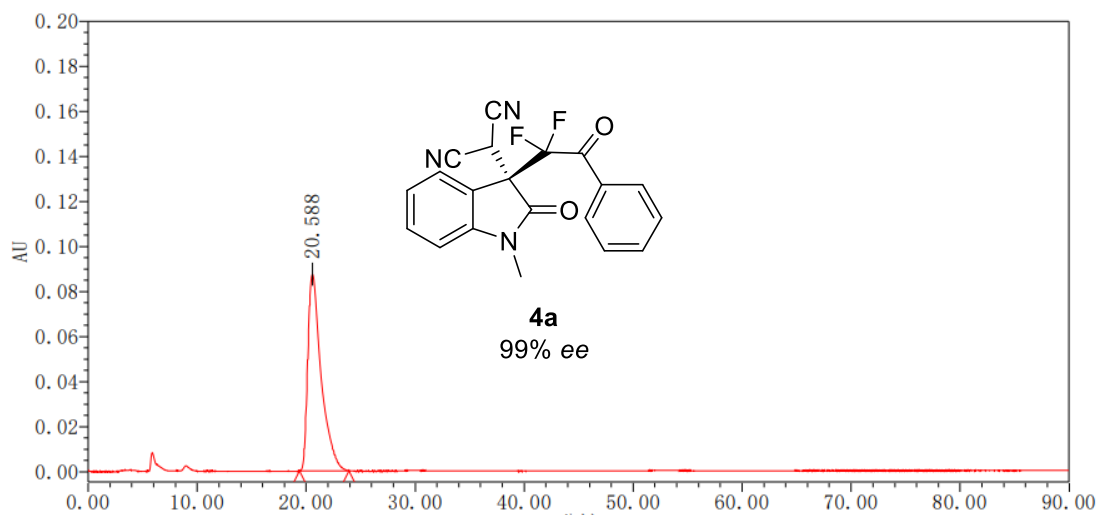

| Entry | RT min | Height mV | Area mV.sec | % Area % |
|-------|--------|-----------|-------------|----------|
| 1     | 20.588 | 87451     | 7455951     | 100      |

Condition: Daicel Chiralpak IG-3,  $\lambda = 254$  nm, hexane/2-propanol = 87:13

flow rate = 1.0 mL/min

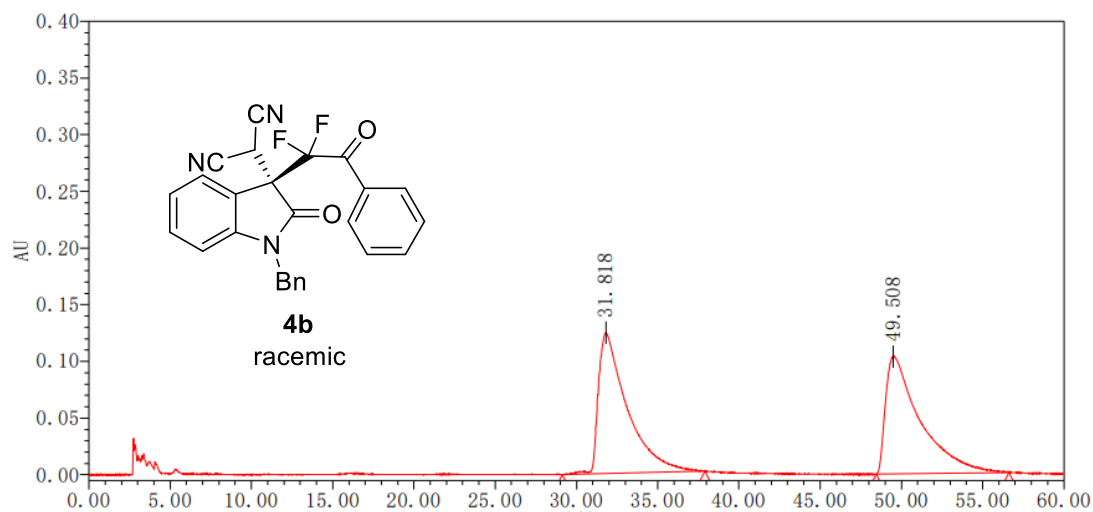

| Entry | RT min | Height mV | Area mV.sec | % Area % |
|-------|--------|-----------|-------------|----------|
| 1     | 31.818 | 124211    | 15242440    | 50.03    |
| 2     | 49.508 | 103653    | 15226670    | 49.97    |

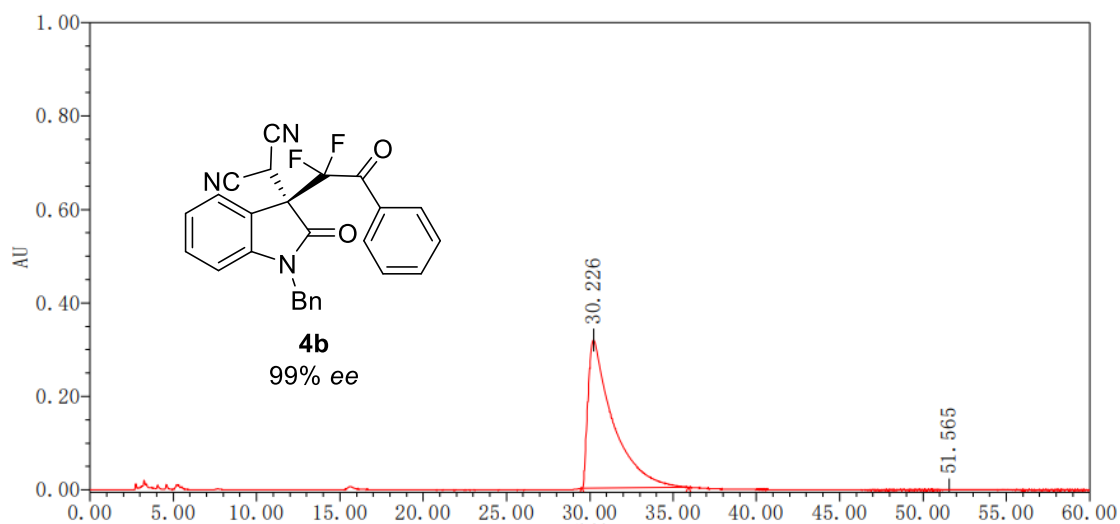

| Entry | RT min | Height mV | Area mV.sec | % Area % |
|-------|--------|-----------|-------------|----------|
| 1     | 30.226 | 316944    | 32843260    | 99.82    |
| 2     | 51.565 | 467       | 60760       | 0.18     |

Condition: Daicel Chiralpak IG-3,  $\lambda = 254$  nm, hexane/2-propanol = 70:30

flow rate = 1.0 mL/min

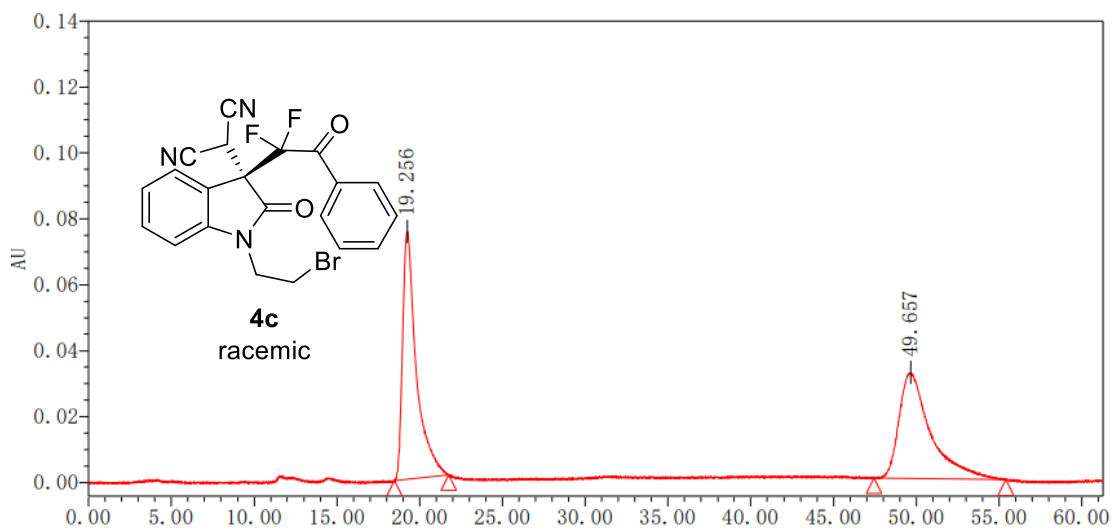

| Entry | RT min | Height mV | Area mV.sec | % Area % |
|-------|--------|-----------|-------------|----------|
| 1     | 19.256 | 75175     | 4281462     | 50.06    |
| 2     | 49.657 | 32147     | 4271038     | 49.94    |

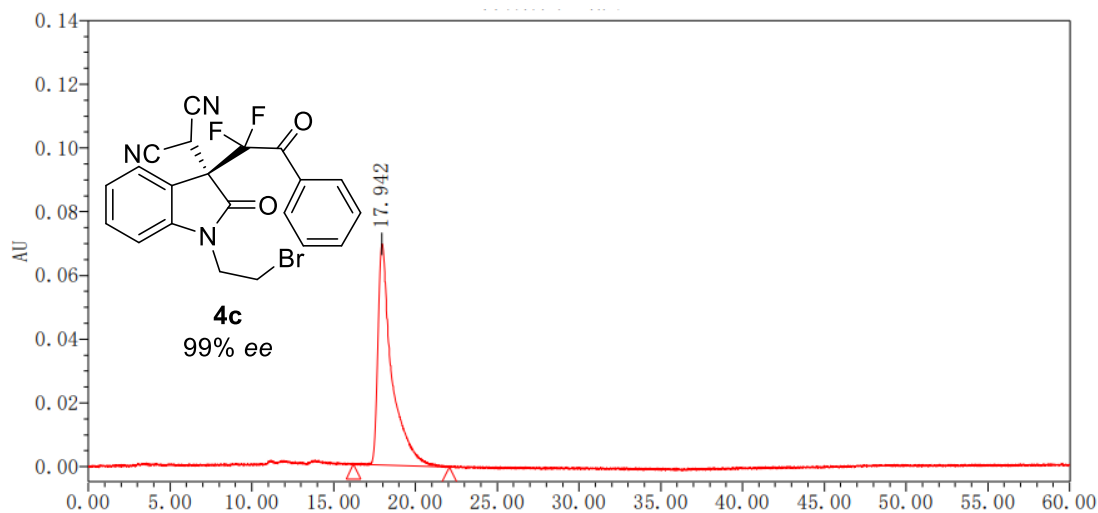

| Entry | RT min | Height mV | Area mV.sec | % Area % |
|-------|--------|-----------|-------------|----------|
| 1     | 17.942 | 69398     | 4123621     | 100      |

Condition: Daicel Chiralpak AD-H,  $\lambda = 254$  nm, hexane/2-propanol = 65:35

flow rate = 1.0 mL/min

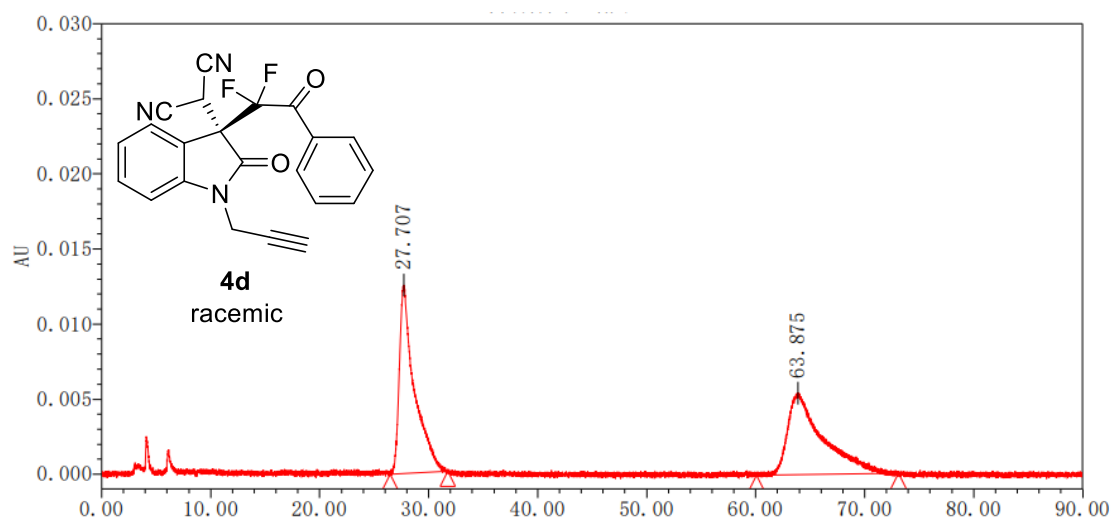

| Entry | RT min | Height mV | Area mV.sec | % Area % |
|-------|--------|-----------|-------------|----------|
| 1     | 27.707 | 12550     | 1206705     | 50.04    |
| 2     | 63.875 | 5418      | 1204696     | 49.96    |

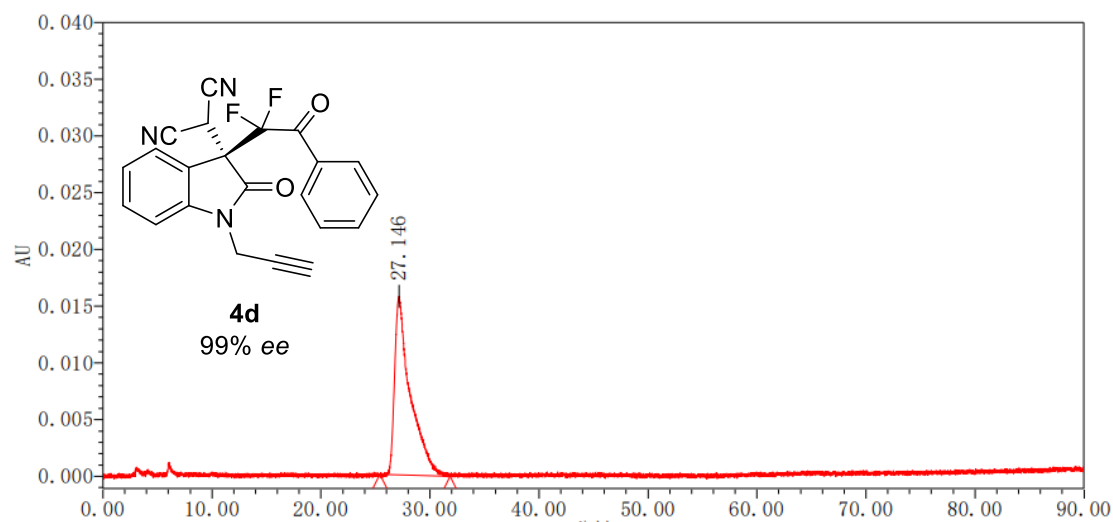

| Entry | RT min | Height mV | Area mV.sec | % Area % |
|-------|--------|-----------|-------------|----------|
| 1     | 27.146 | 15752     | 1568886     | 100      |



Condition: Daicel Chiralpak IG-3,  $\lambda = 254$  nm, hexane/2-propanol = 70:30

flow rate = 1.0 mL/min

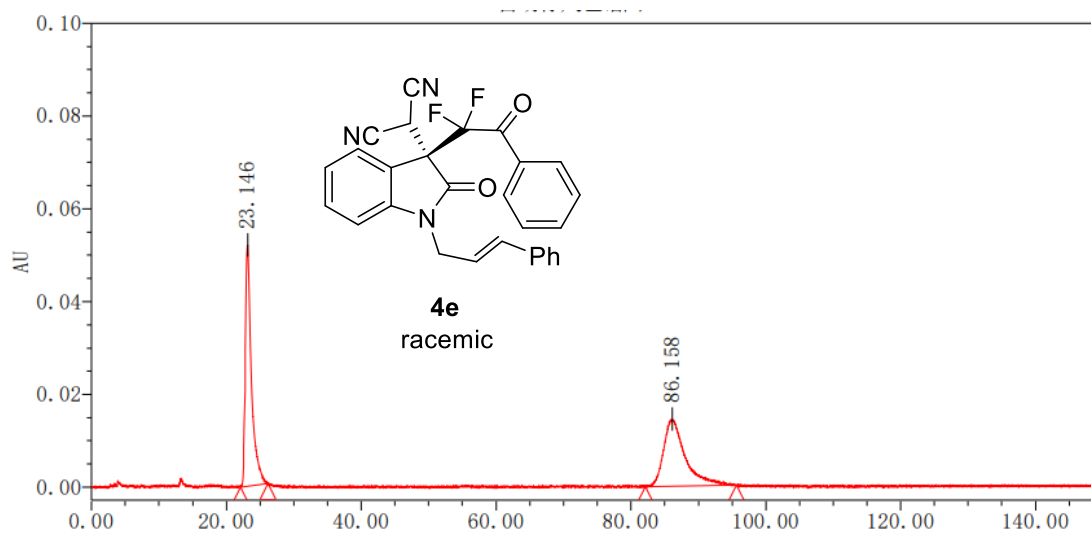

| Entry | RT min | Height mV | Area mV.sec | % Area % |
|-------|--------|-----------|-------------|----------|
| 1     | 23.146 | 51971     | 3280345     | 50.41    |
| 2     | 63.875 | 5418      | 3227588     | 49.59    |

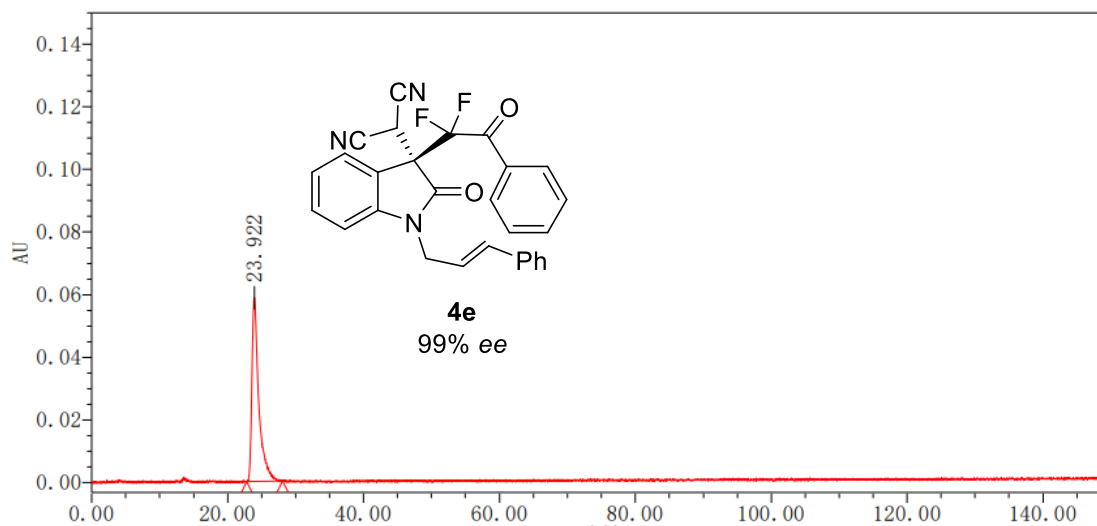

| Entry | RT min | Height mV | Area mV.sec | % Area % |
|-------|--------|-----------|-------------|----------|
| 1     | 23.922 | 58733     | 4059131     | 100      |

Condition: Daicel Chiralpak IG-3,  $\lambda = 254$  nm, hexane/2-propanol = 90:10

flow rate = 1.0 mL/min

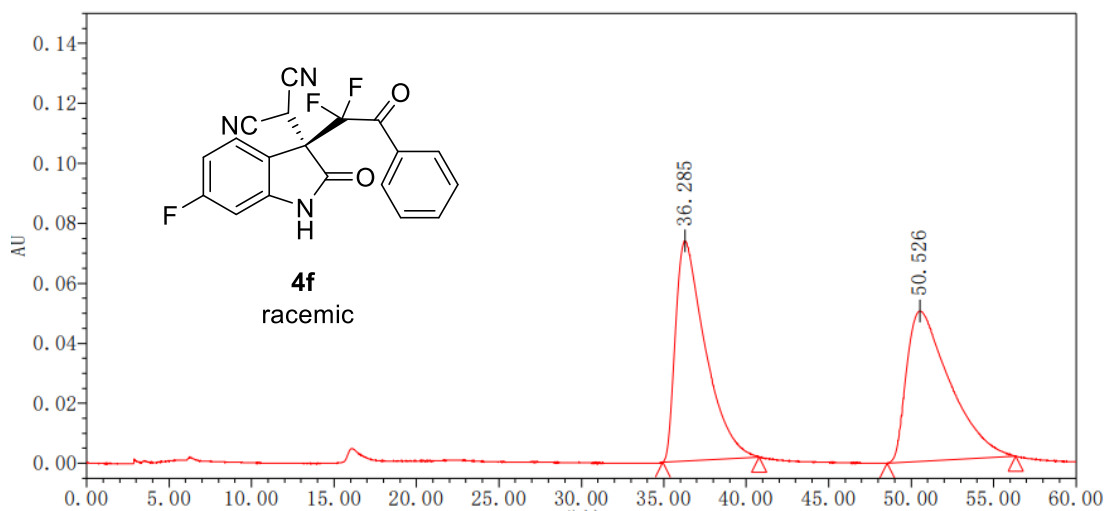

| Entry | RT min | Height mV | Area mV.sec | % Area % |
|-------|--------|-----------|-------------|----------|
| 1     | 36.285 | 73382     | 9251359     | 50.29    |
| 2     | 49.508 | 103653    | 9144926     | 49.71    |

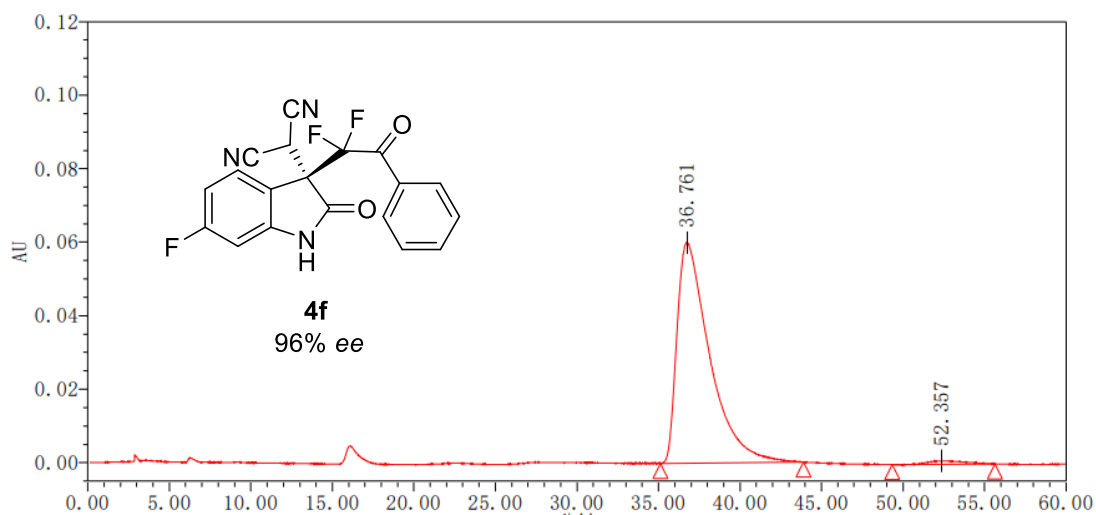

| Entry | RT min | Height mV | Area mV.sec | % Area % |
|-------|--------|-----------|-------------|----------|
| 1     | 36.761 | 60008     | 8360467     | 98.31    |
| 2     | 52.357 | 912       | 143775      | 1.69     |

Condition: Daicel Chiralpak AD-H,  $\lambda = 254$  nm, hexane/2-propanol = 80:20

flow rate = 1.0 mL/min

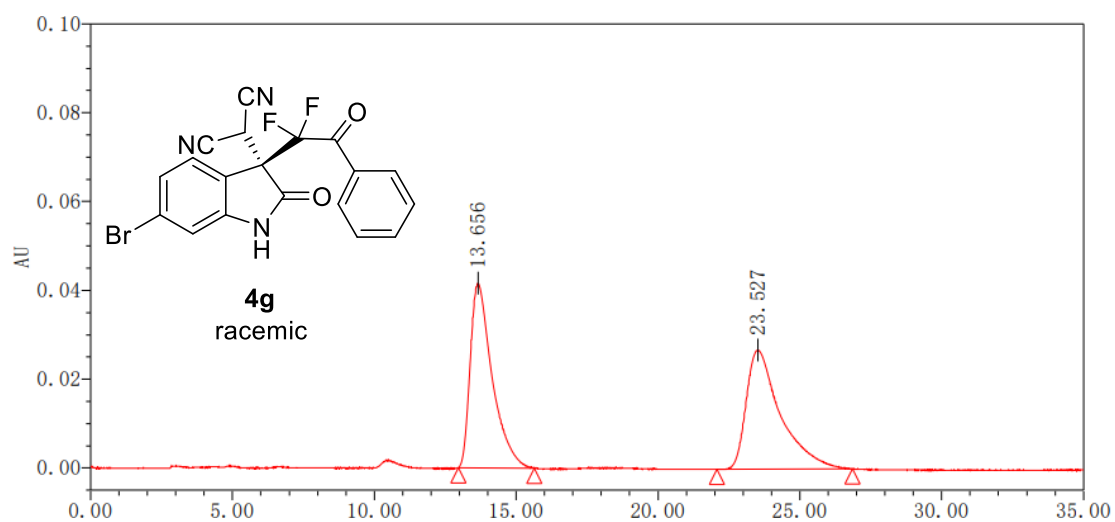

| Entry | RT min | Height mV | Area mV.sec | % Area % |
|-------|--------|-----------|-------------|----------|
| 1     | 13.656 | 41526     | 2235226     | 49.94    |
| 2     | 23.527 | 26808     | 2240755     | 50.06    |

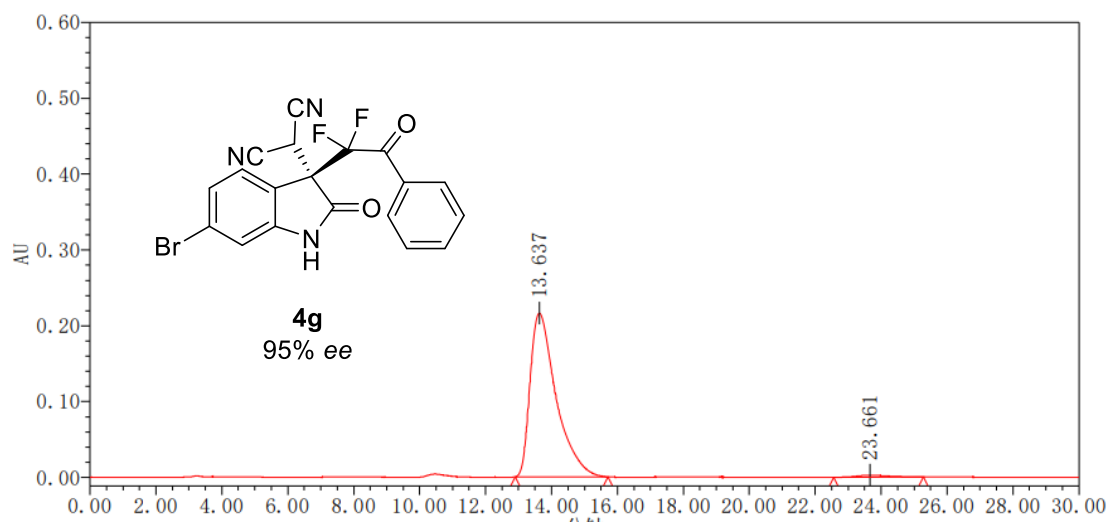

| Entry | RT min | Height mV | Area mV.sec | % Area % |
|-------|--------|-----------|-------------|----------|
| 1     | 13.637 | 215874    | 11800067    | 98.64    |
| 2     | 23.661 | 2439      | 162117      | 1.36     |

Condition: Daicel Chiralpak IG-3 ,  $\lambda = 254$  nm, hexane/2-propanol = 80:20

flow rate = 1.0 mL/min

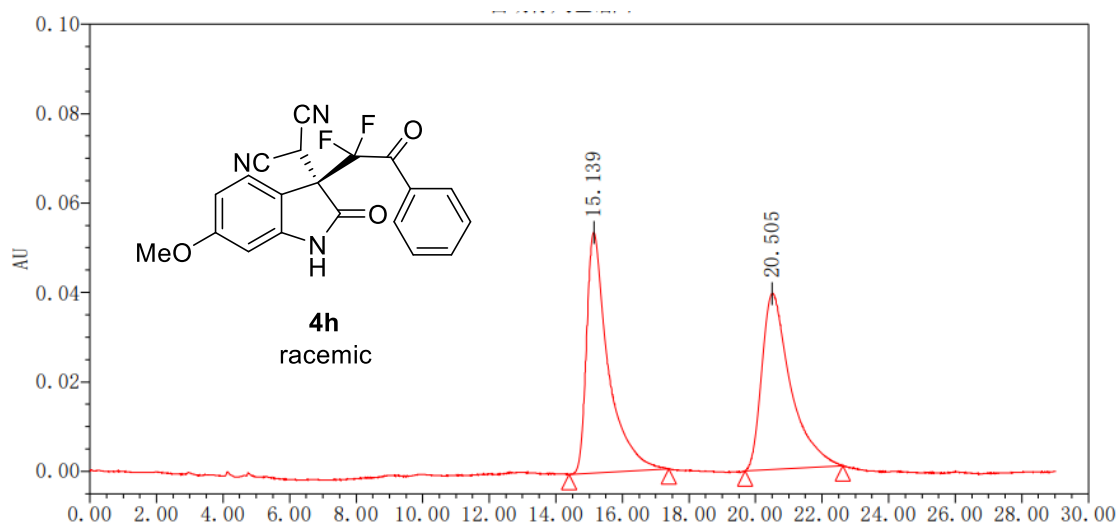

| Entry | RT min | Height mV | Area mV.sec | % Area % |
|-------|--------|-----------|-------------|----------|
| 1     | 15.139 | 53795     | 2439434     | 50.78    |
| 2     | 20.505 | 39323     | 2364902     | 49.22    |

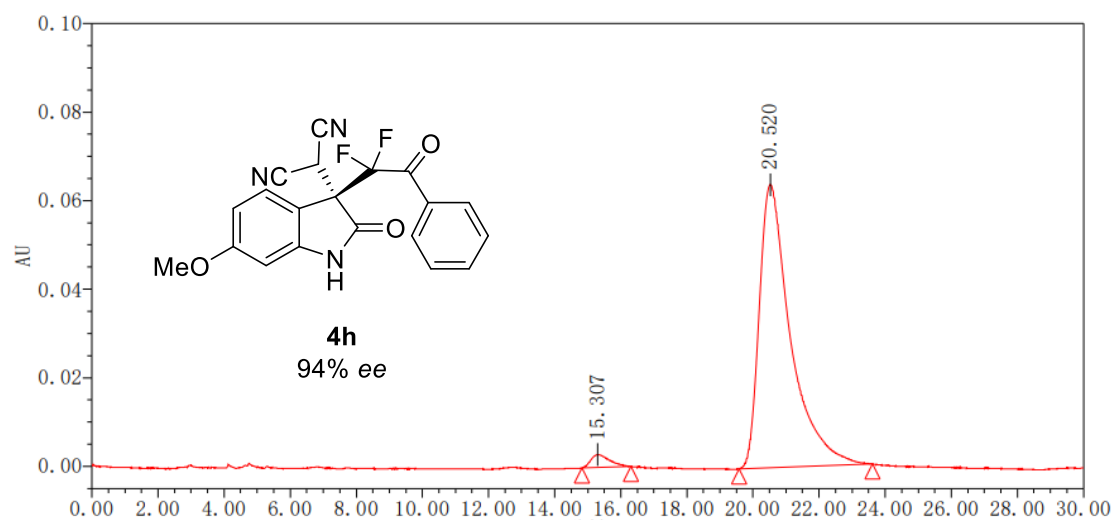

| Entry | RT min | Height mV | Area mV.sec | % Area % |
|-------|--------|-----------|-------------|----------|
| 1     | 15.307 | 2934      | 116006      | 2.69     |
| 2     | 20.520 | 63924     | 4189752     | 97.31    |

Condition: Daicel Chiralpak AD-H,  $\lambda = 254$  nm, hexane/2-propanol = 80:20

flow rate = 1.0 mL/min

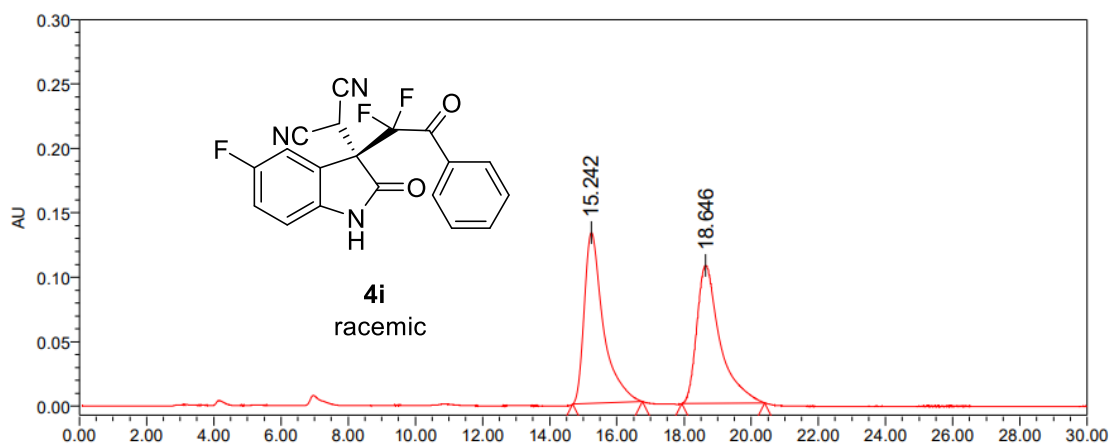

| Entry | RT min | Height mV | Area mV.sec | % Area % |
|-------|--------|-----------|-------------|----------|
| 1     | 15.242 | 132632    | 5227234     | 50.29    |
| 2     | 18.646 | 107191    | 5166616     | 49.71    |

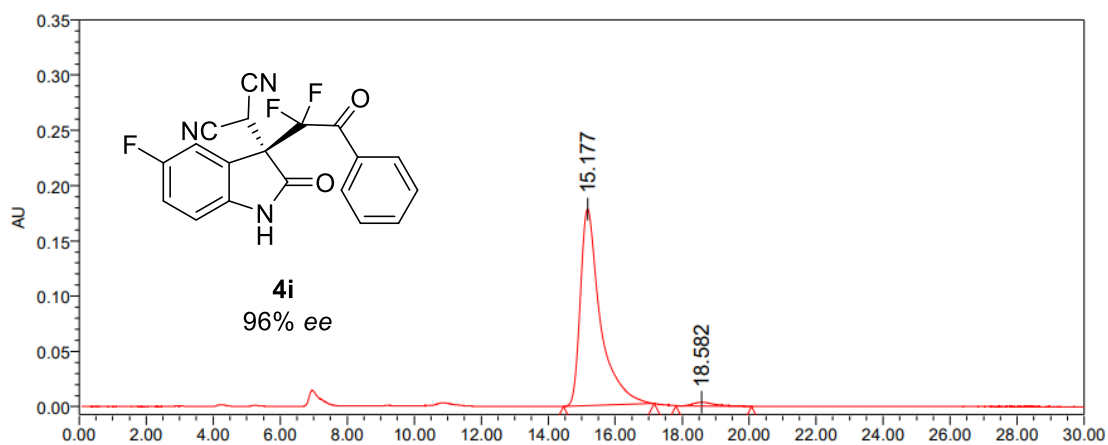

| Entry | RT min | Height mV | Area mV.sec | % Area % |
|-------|--------|-----------|-------------|----------|
| 1     | 15.177 | 177905    | 7340732     | 98.10    |
| 2     | 18.582 | 3308      | 142174      | 1.90     |

Condition: Daicel Chiralpak AD-H,  $\lambda = 254$  nm, hexane/2-propanol = 80:20

flow rate = 1.0 mL/min

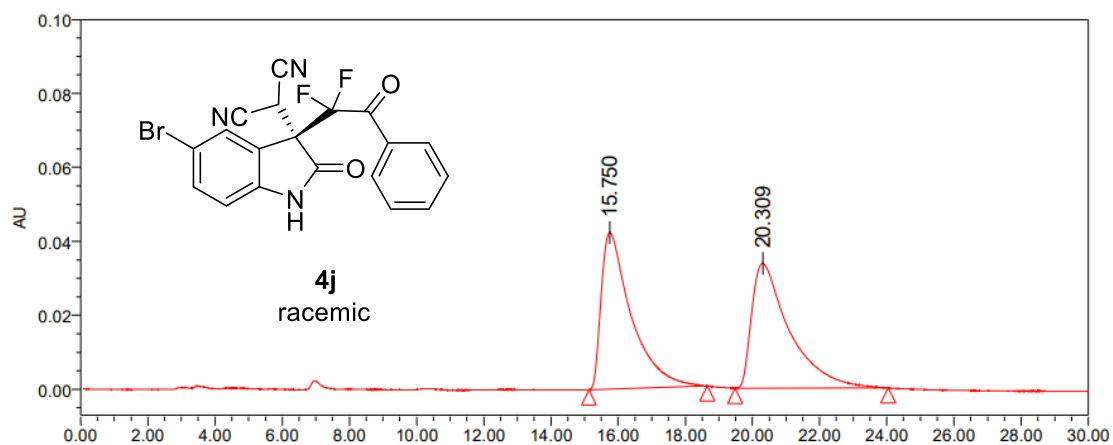

| Entry | RT min | Height mV | Area mV.sec | % Area % |
|-------|--------|-----------|-------------|----------|
| 1     | 15.750 | 42330     | 2626976     | 49.97    |
| 2     | 20.309 | 33778     | 2630050     | 50.03    |

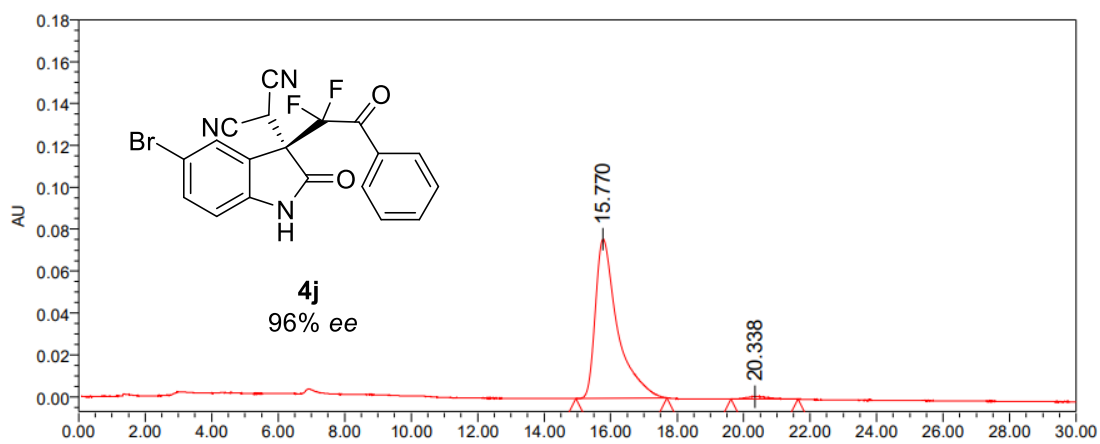

| Entry | RT min | Height mV | Area mV.sec | % Area % |
|-------|--------|-----------|-------------|----------|
| 1     | 15.770 | 75975     | 3497690     | 98.27    |
| 2     | 20.338 | 1286      | 61618       | 1.73     |

Condition: Daicel Chiralpak IG-3 ,  $\lambda = 254$  nm, hexane/2-propanol = 90:10

flow rate = 1.0 mL/min

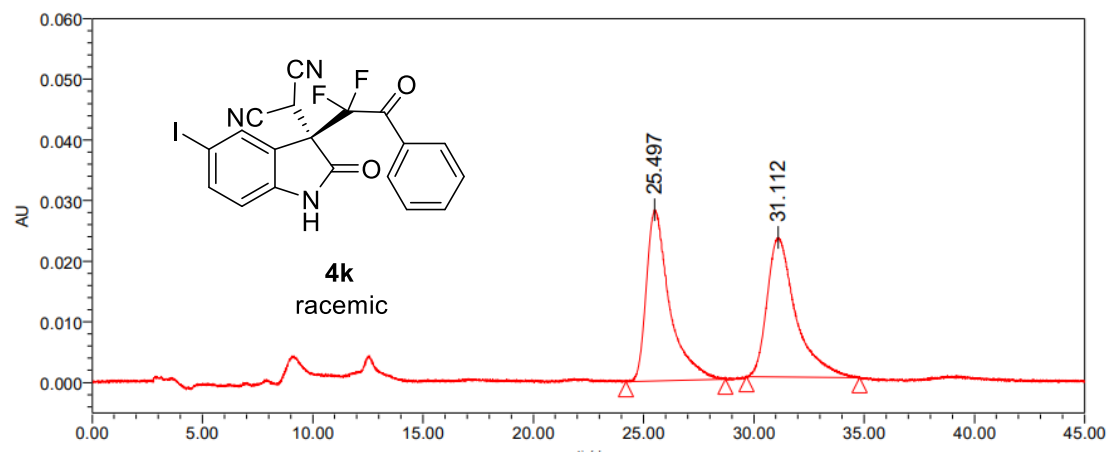

| Entry | RT min | Height mV | Area mV.sec | % Area % |
|-------|--------|-----------|-------------|----------|
| 1     | 25.497 | 28213     | 2065639     | 49.79    |
| 2     | 31.112 | 23046     | 2083111     | 50.21    |

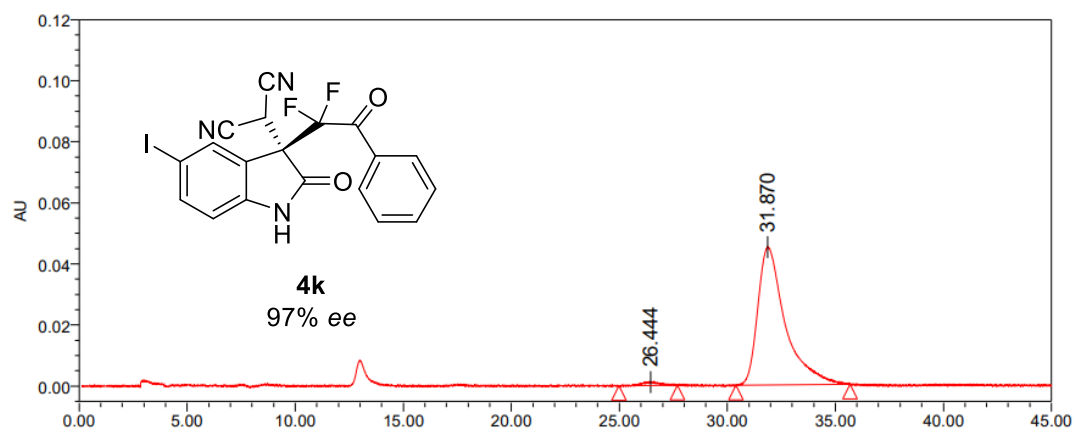

| Entry | RT min | Height mV | Area mV.sec | % Area % |
|-------|--------|-----------|-------------|----------|
| 1     | 26.444 | 1074      | 59709       | 1.48     |
| 2     | 31.870 | 45127     | 3980371     | 98.52    |

Condition: Daicel Chiralpak AD-H,  $\lambda = 254$  nm, hexane/2-propanol = 70:30

flow rate = 1.0 mL/min

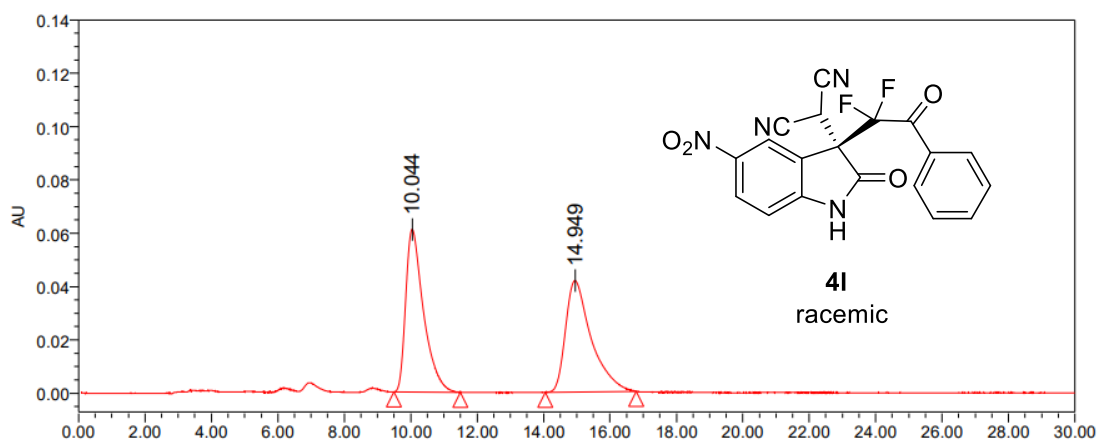

| Entry | RT min | Height mV | Area mV.sec | % Area % |
|-------|--------|-----------|-------------|----------|
| 1     | 10.044 | 61050     | 2264348     | 50.28    |
| 2     | 14.949 | 41761     | 2238692     | 49.72    |

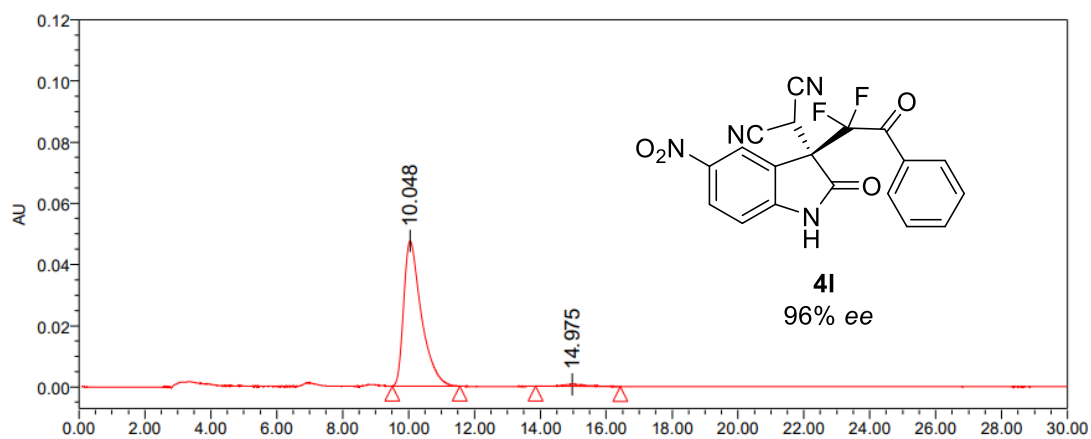

| Entry | RT min | Height mV | Area mV.sec | % Area % |
|-------|--------|-----------|-------------|----------|
| 1     | 10.048 | 47345     | 1756495     | 98.21    |
| 2     | 14.975 | 652       | 32017       | 1.79     |



Condition: Daicel Chiralpak IG-3 ,  $\lambda = 254 \text{ nm}$ , hexane/2-propanol = 85:15

flow rate = 1.0 mL/min

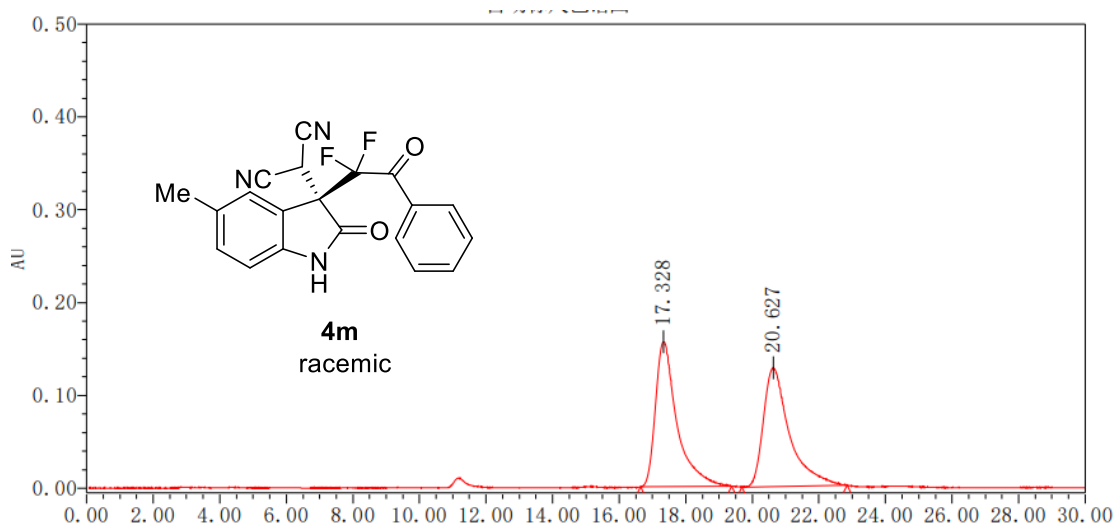

| Entry | RT min | Height mV | Area mV.sec | % Area % |
|-------|--------|-----------|-------------|----------|
| 1     | 17.328 | 156352    | 7000187     | 50.23    |
| 2     | 20.627 | 127606    | 6936803     | 49.77    |

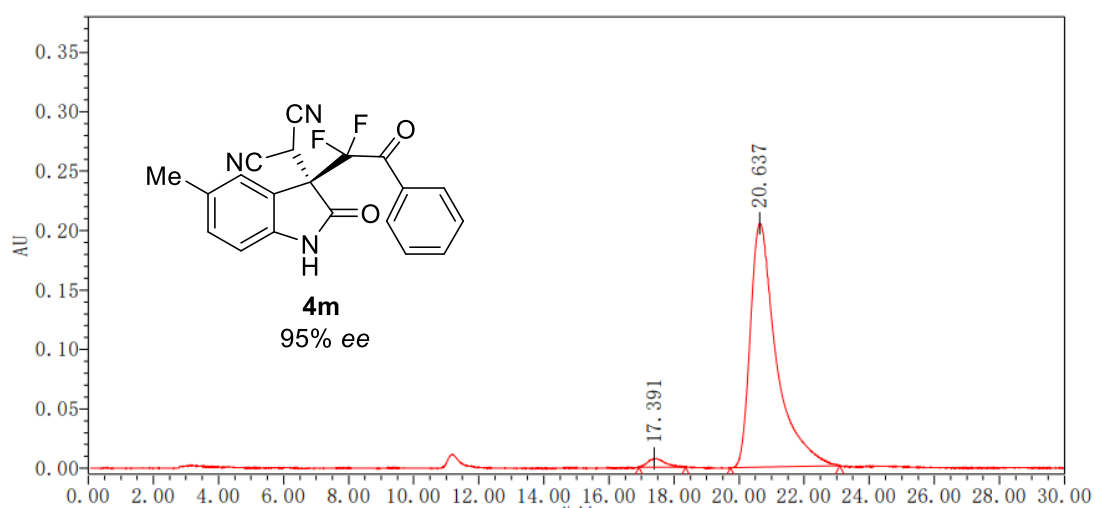

| Entry | RT min | Height mV | Area mV.sec | % Area % |
|-------|--------|-----------|-------------|----------|
| 1     | 17.391 | 7245      | 267827      | 2.29     |
| 2     | 20.637 | 205262    | 11416605    | 97.71    |

Condition: Daicel Chiralpak AD-H,  $\lambda = 254$  nm, hexane/2-propanol = 85:15

flow rate = 1.0 mL/min

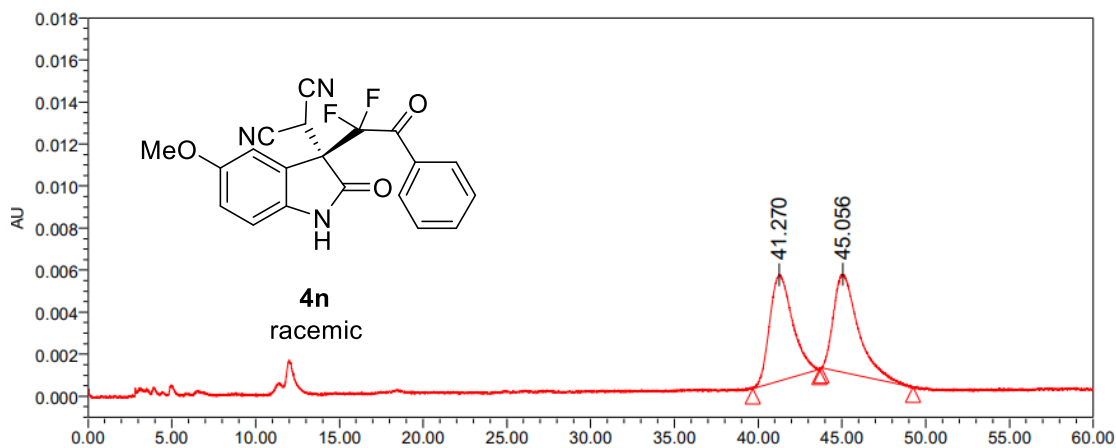

| Entry | RT min | Height Mv | Area Mv.sec | % Area % |
|-------|--------|-----------|-------------|----------|
| 1     | 41.270 | 5050      | 477983      | 49.84    |
| 2     | 45.056 | 4658      | 481146      | 50.16    |

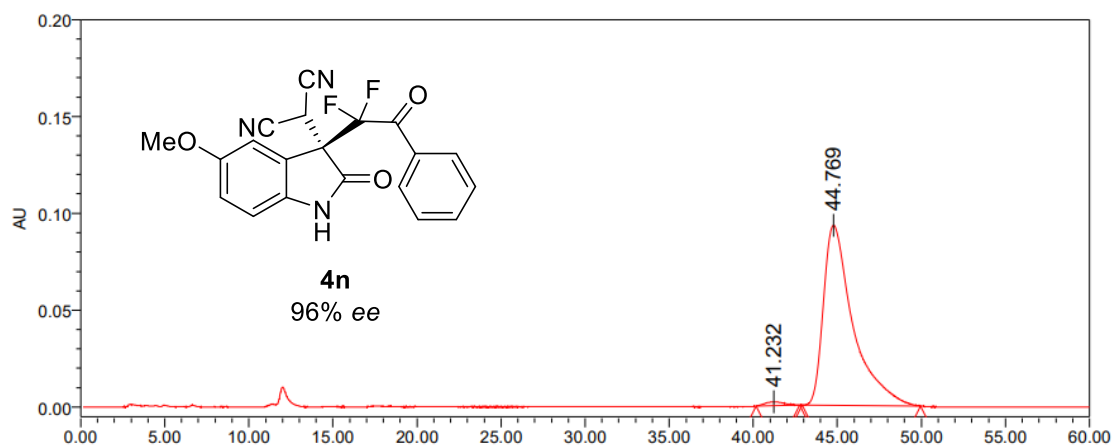

| Entry | RT min | Height Mv | Area Mv.sec | % Area % |
|-------|--------|-----------|-------------|----------|
| 1     | 41.232 | 2017      | 159417      | 1.38     |
| 2     | 44.769 | 92994     | 11379363    | 98.62    |

Condition: Daicel Chiralpak IG-3,  $\lambda = 254$  nm, hexane/2-propanol = 90:10

flow rate = 1.0 mL/min

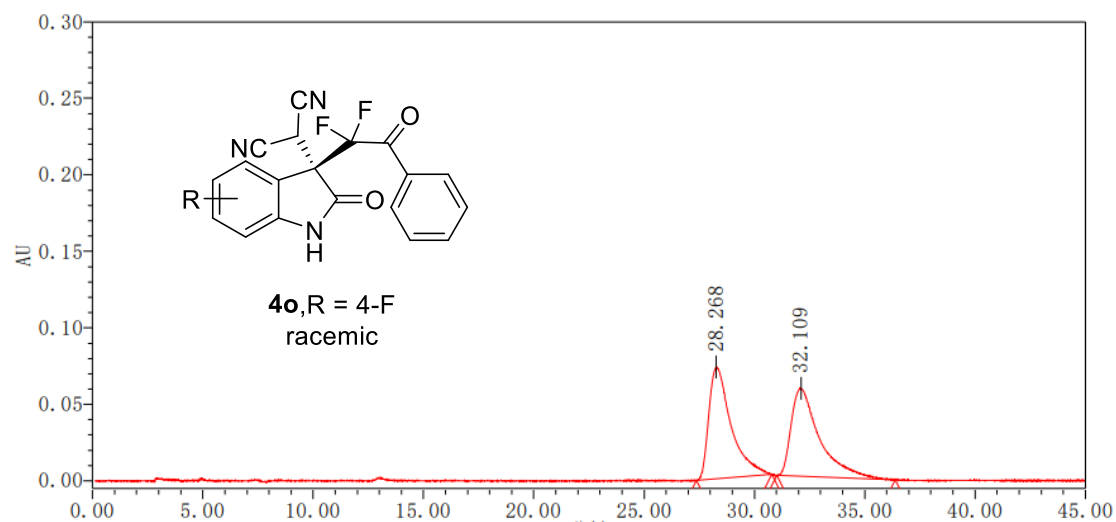

| Entry | RT min | Height Mv | Area Mv.sec | % Area % |
|-------|--------|-----------|-------------|----------|
| 1     | 28.268 | 72916     | 5109807     | 50.11    |
| 2     | 32.109 | 57371     | 5087894     | 49.89    |

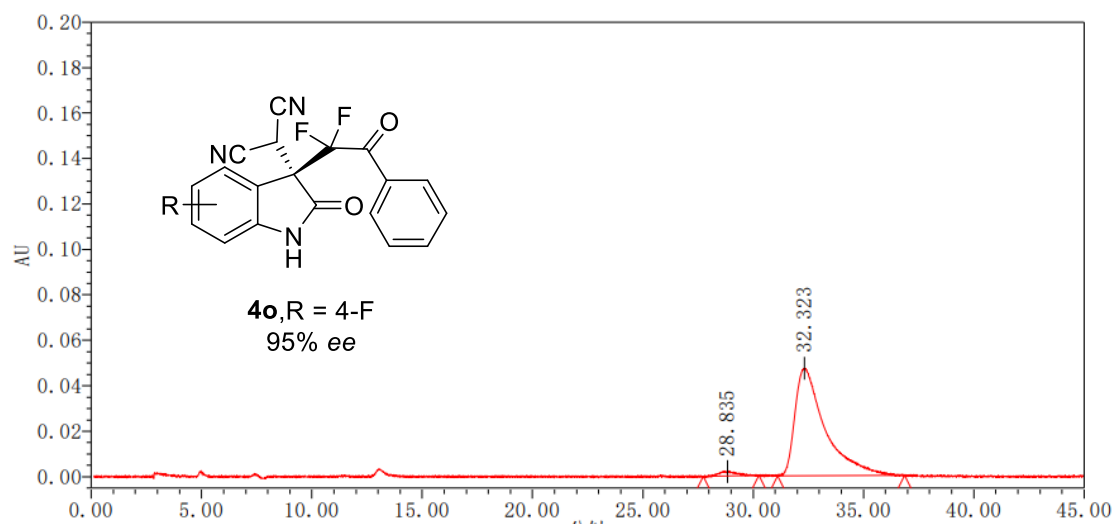

| Entry | RT min | Height Mv | Area Mv.sec | % Area % |
|-------|--------|-----------|-------------|----------|
| 1     | 28.835 | 2004      | 110556      | 2.41     |
| 2     | 32.323 | 47381     | 4479993     | 97.59    |

Condition: Daicel Chiralpak IG-3,  $\lambda = 254$  nm, hexane/2-propanol = 90:10

flow rate = 1.0 mL/min

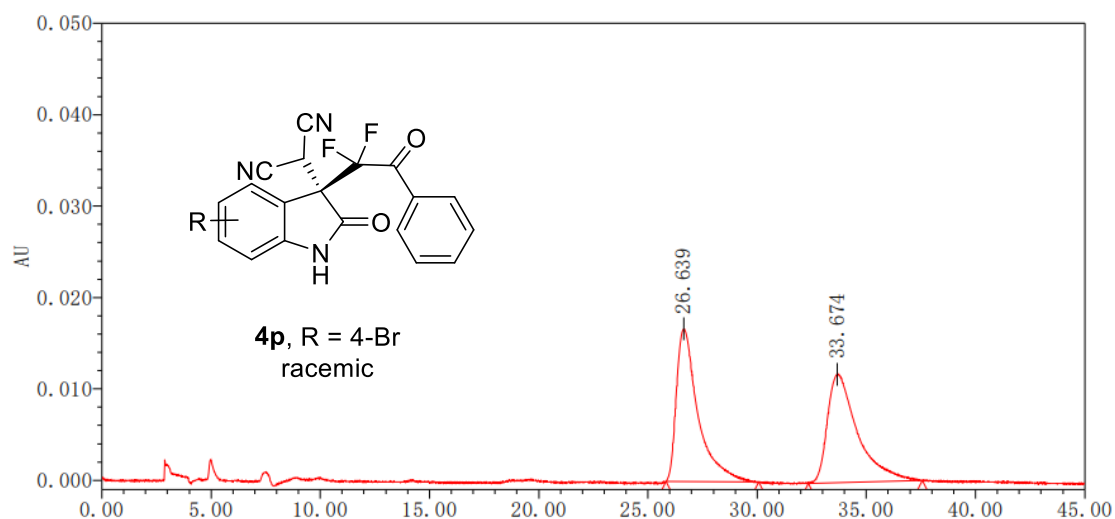

| Entry | RT min | Height Mv | Area Mv.sec | % Area % |
|-------|--------|-----------|-------------|----------|
| 1     | 26.639 | 16689     | 1149732     | 50.24    |
| 2     | 33.674 | 11855     | 1138838     | 49.76    |

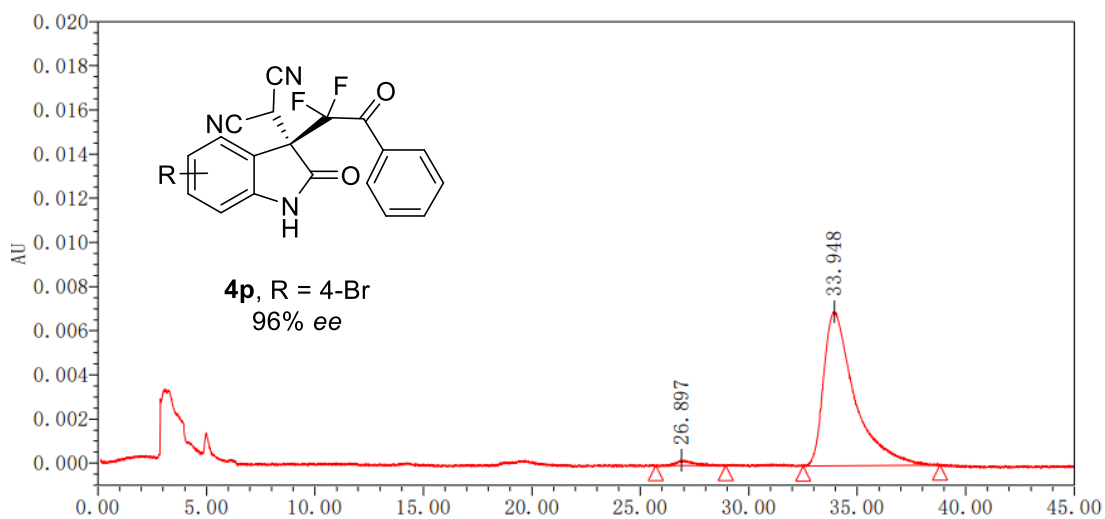

| Entry | RT min | Height Mv | Area Mv.sec | % Area % |
|-------|--------|-----------|-------------|----------|
| 1     | 26.897 | 249       | 12691       | 1.83     |
| 2     | 33.948 | 6978      | 693293      | 98.17    |

Condition: Daicel Chiralpak IG-3,  $\lambda = 254$  nm, hexane/2-propanol = 85:15

flow rate = 1.0 mL/min

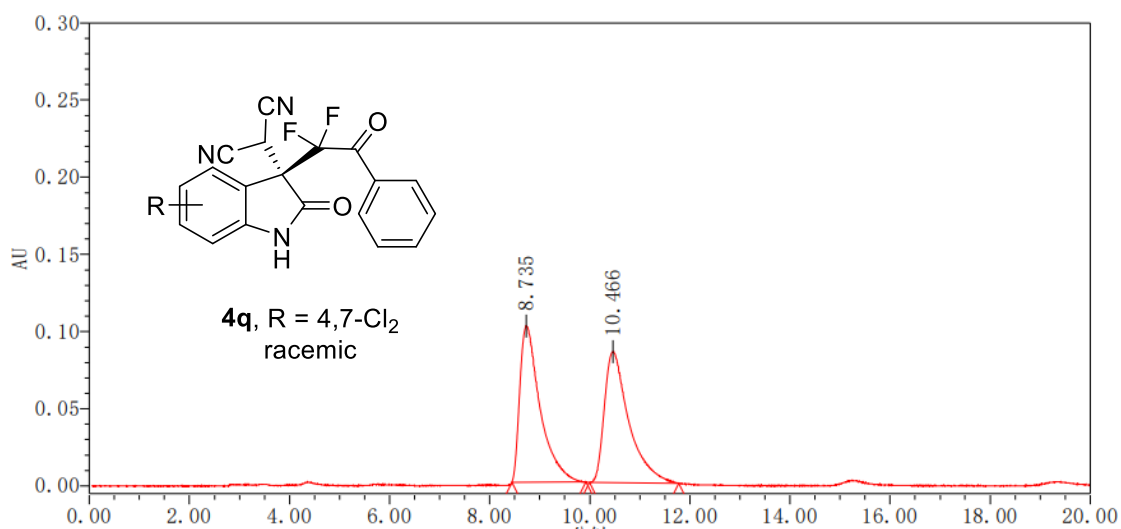

| Entry | RT min | Height Mv | Area Mv.sec | % Area % |
|-------|--------|-----------|-------------|----------|
| 1     | 8.735  | 101318    | 2865741     | 49.85    |
| 2     | 10.466 | 84986     | 2883083     | 50.15    |

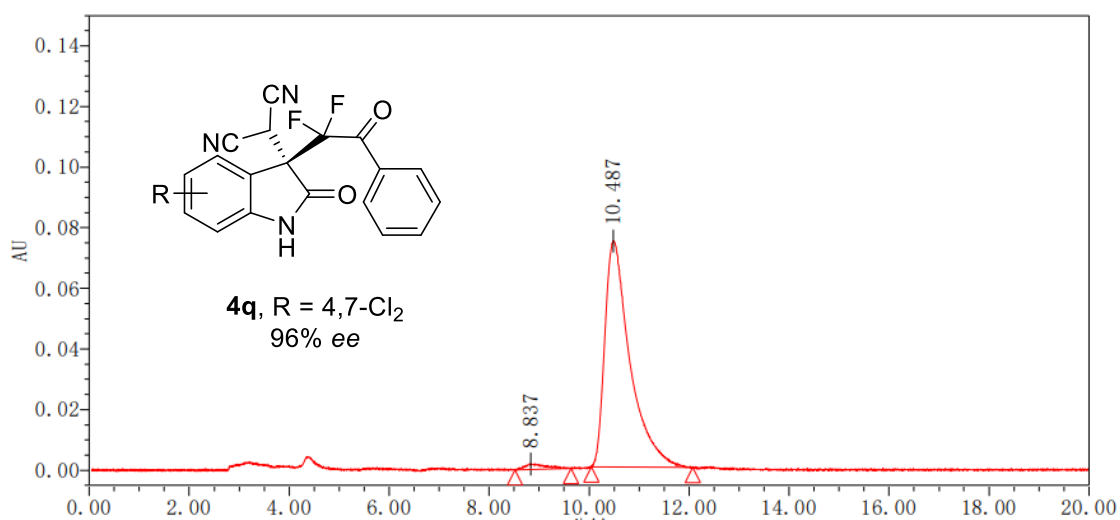

| Entry | RT min | Height Mv | Area Mv.sec | % Area % |
|-------|--------|-----------|-------------|----------|
| 1     | 8.837  | 1788      | 51980       | 1.95     |
| 2     | 10.487 | 74660     | 2609658     | 98.05    |

Condition: Daicel Chiralpak IG-3,  $\lambda = 254$  nm, hexane/2-propanol = 85:15

flow rate = 1.0 mL/min

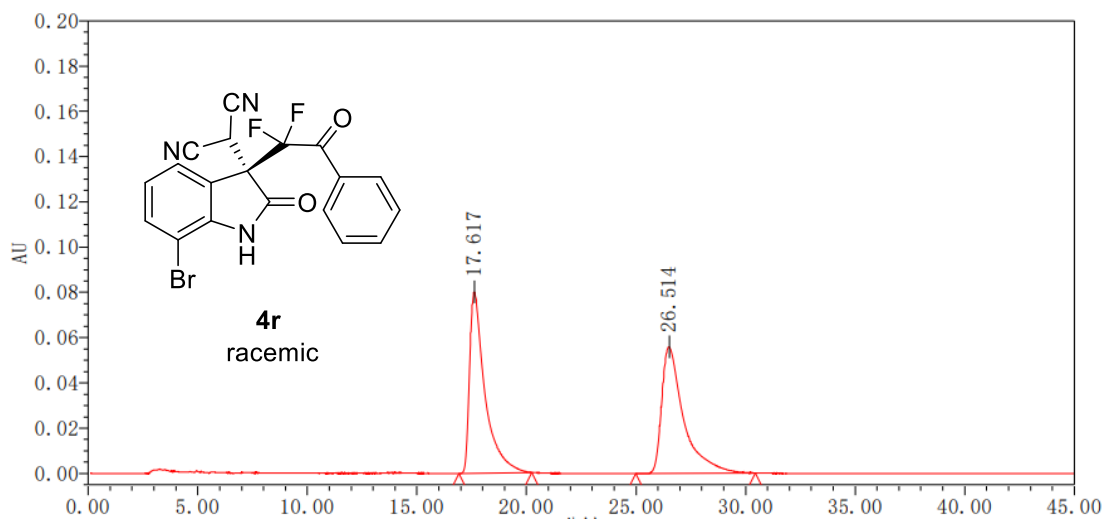

| Entry | RT min | Height Mv | Area Mv.sec | % Area % |
|-------|--------|-----------|-------------|----------|
| 1     | 17.617 | 80090     | 3942273     | 50.28    |
| 2     | 26.514 | 55934     | 3897778     | 49.72    |

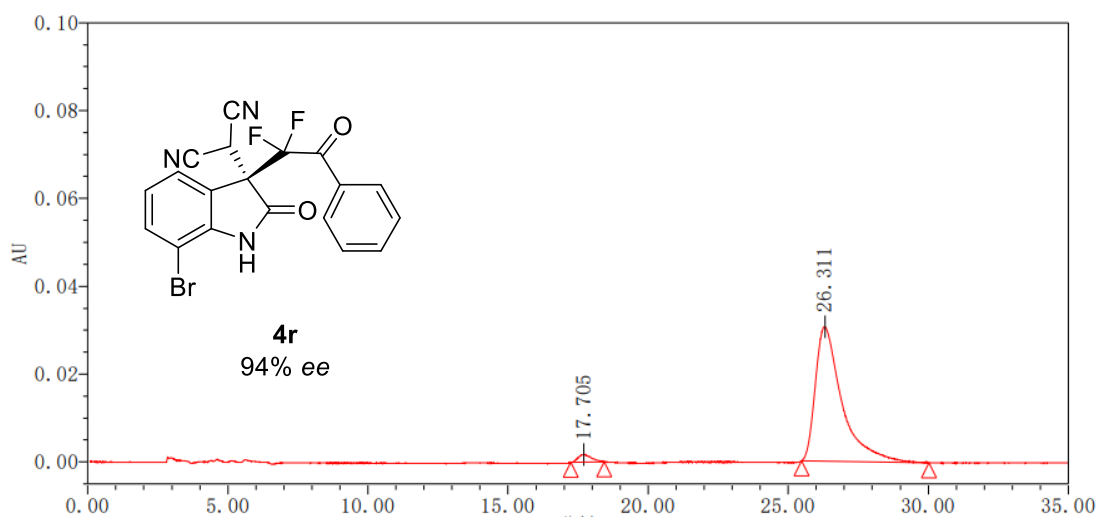

| Entry | RT min | Height Mv | Area Mv.sec | % Area % |
|-------|--------|-----------|-------------|----------|
| 1     | 17.705 | 1747      | 58573       | 2.81     |
| 2     | 26.311 | 30636     | 2025936     | 97.19    |

Condition: Daicel Chiralpak IG-3,  $\lambda = 254$  nm, hexane/2-propanol = 80:20

flow rate = 1.0 mL/min

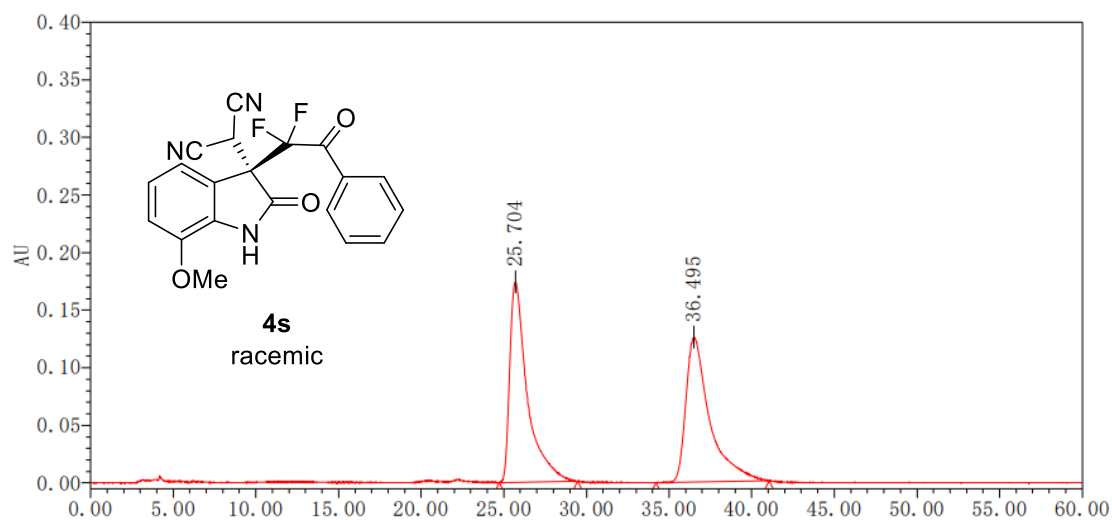

| Entry | RT min | Height mV | Area mV.sec | % Area % |
|-------|--------|-----------|-------------|----------|
| 1     | 25.704 | 174028    | 12793759    | 50.33    |
| 2     | 36.495 | 125758    | 12626148    | 49.67    |

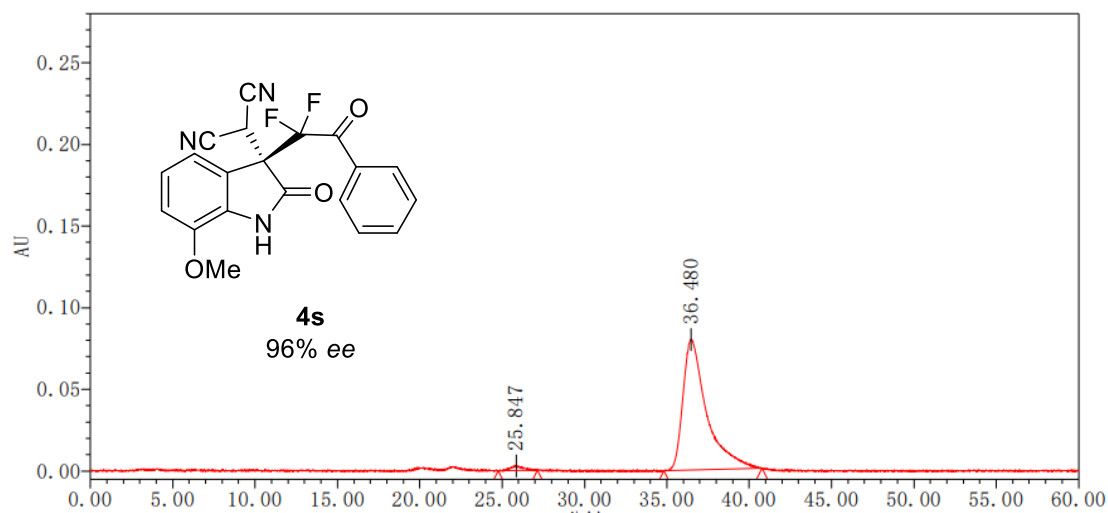

| Entry | RT min | Height mV | Area mV.sec | % Area % |
|-------|--------|-----------|-------------|----------|
| 1     | 25.847 | 2638      | 140669      | 1.72     |
| 2     | 36.480 | 80056     | 8049494     | 98.28    |

Condition: Daicel Chiralpak IG-3,  $\lambda = 254 \text{ nm}$ , hexane/2-propanol = 90:10

flow rate = 1.0 mL/min

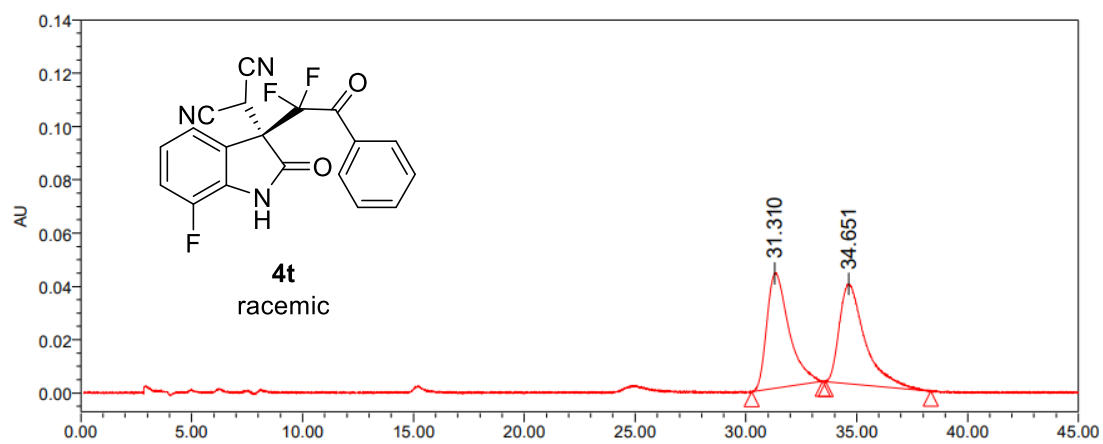

| Entry | RT min | Height mV | Area mV.sec | % Area % |
|-------|--------|-----------|-------------|----------|
| 1     | 31.310 | 43290     | 3019182     | 50.04    |
| 2     | 34.651 | 37411     | 3014373     | 49.96    |

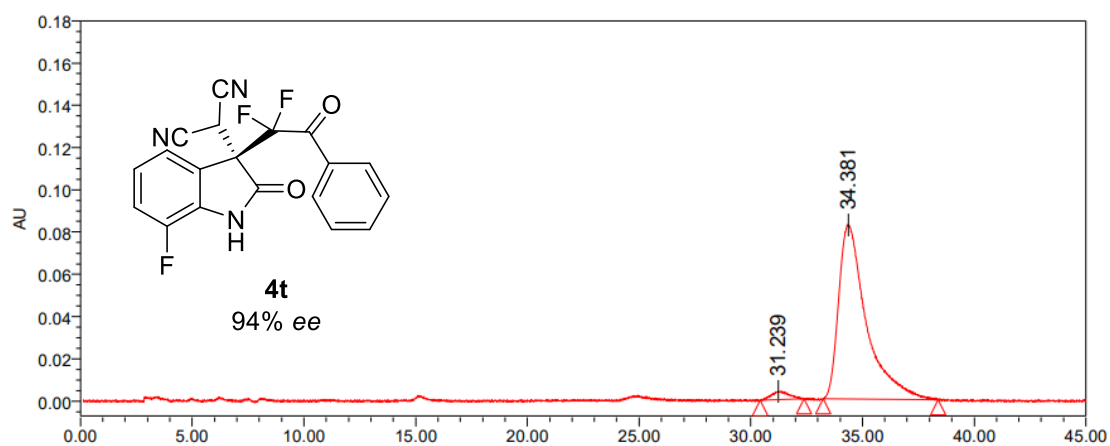

| Entry | RT min | Height mV | Area mV.sec | % Area % |
|-------|--------|-----------|-------------|----------|
| 1     | 31.239 | 3866      | 217991      | 2.98     |
| 2     | 34.381 | 82255     | 7093829     | 97.02    |



Condition: Daicel Chiralpak IG-3,  $\lambda = 254 \text{ nm}$ , hexane/2-propanol = 80:20

flow rate = 1.0 mL/min

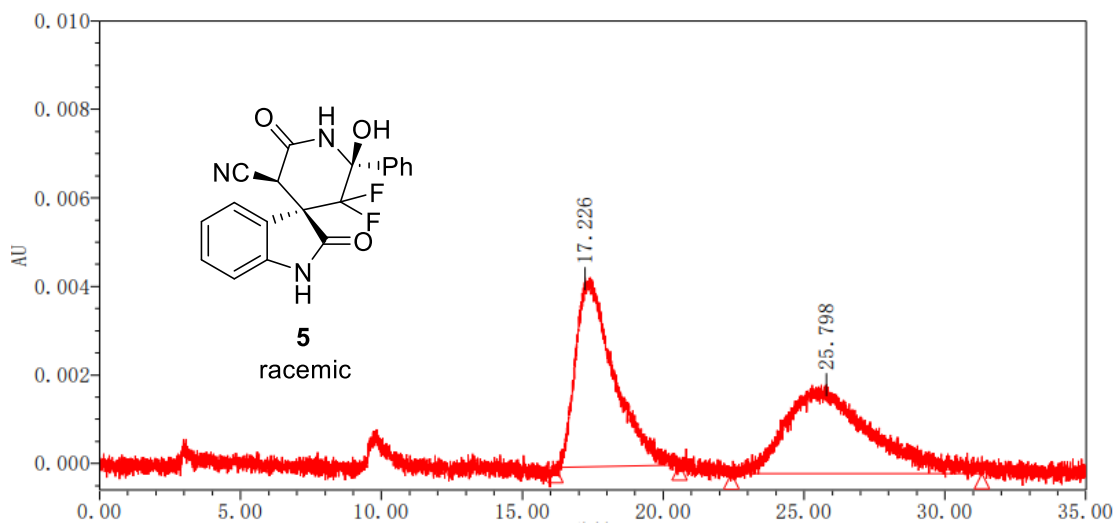

| Entry | RT min | Height mV | Area mV.sec | % Area % |
|-------|--------|-----------|-------------|----------|
| 1     | 17.226 | 4279      | 402521      | 49.96    |
| 2     | 25.798 | 1999      | 403092      | 50.04    |

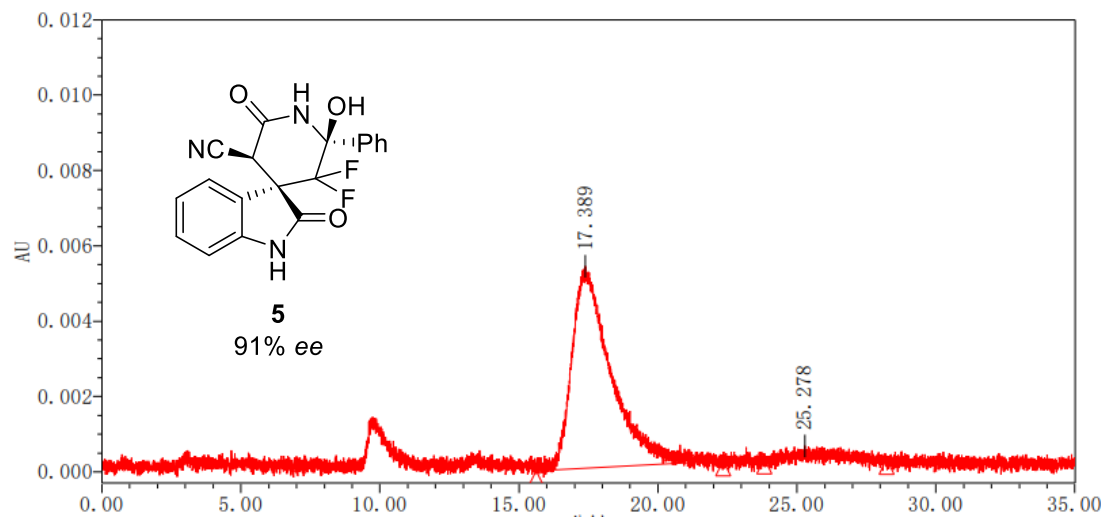

| Entry | RT min | Height mV | Area mV.sec | % Area % |
|-------|--------|-----------|-------------|----------|
| 1     | 17.389 | 5370      | 528526      | 95.63    |
| 2     | 25.278 | 341       | 24135       | 4.37     |

Condition: Daicel Chiralpak IG-3 ,  $\lambda = 254 \text{ nm}$ , hexane/2-propanol = 70:30

flow rate = 1.0 mL/min

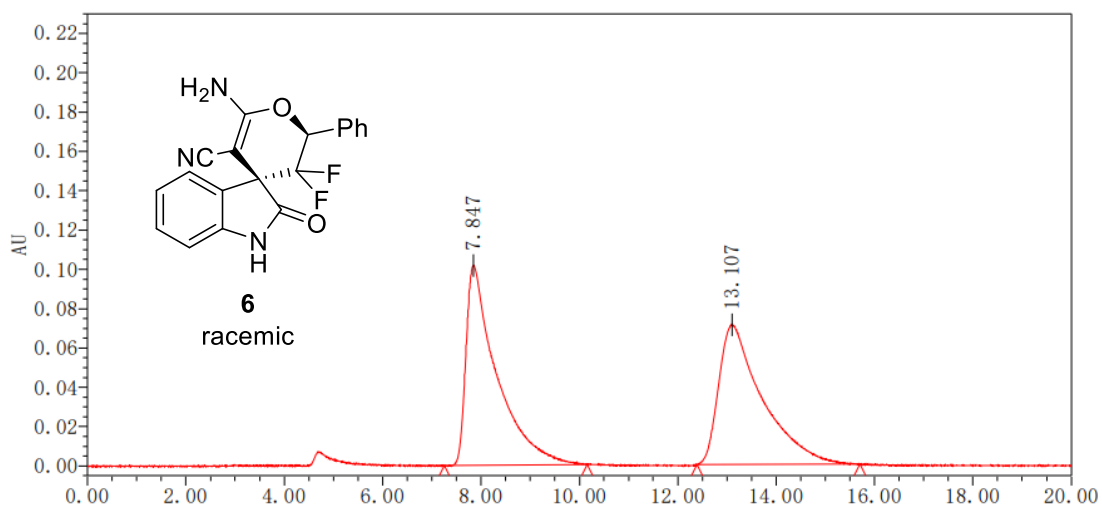

| Entry | RT min | Height mV | Area mV.sec | % Area % |
|-------|--------|-----------|-------------|----------|
| 1     | 7.847  | 101727    | 4413163     | 50.27    |
| 2     | 13.107 | 71259     | 4365280     | 49.73    |

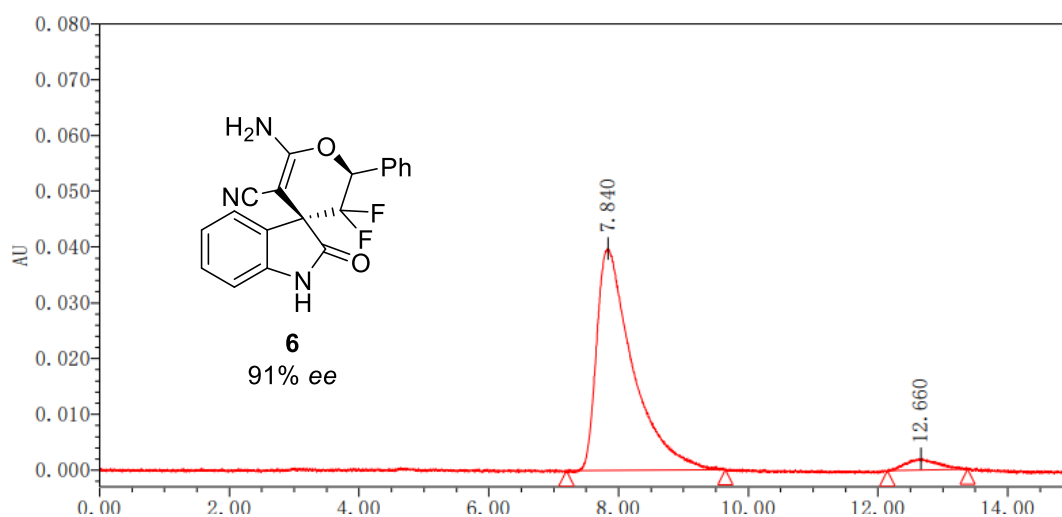

| Entry | RT min | Height mV | Area mV.sec | % Area % |
|-------|--------|-----------|-------------|----------|
| 1     | 7.840  | 39780     | 1539161     | 95.73    |
| 2     | 12.660 | 2057      | 68653       | 4.27     |

Condition: Daicel Chiralpak AD-H,  $\lambda = 254$  nm, hexane/2-propanol = 80:20

flow rate = 1.0 mL/min

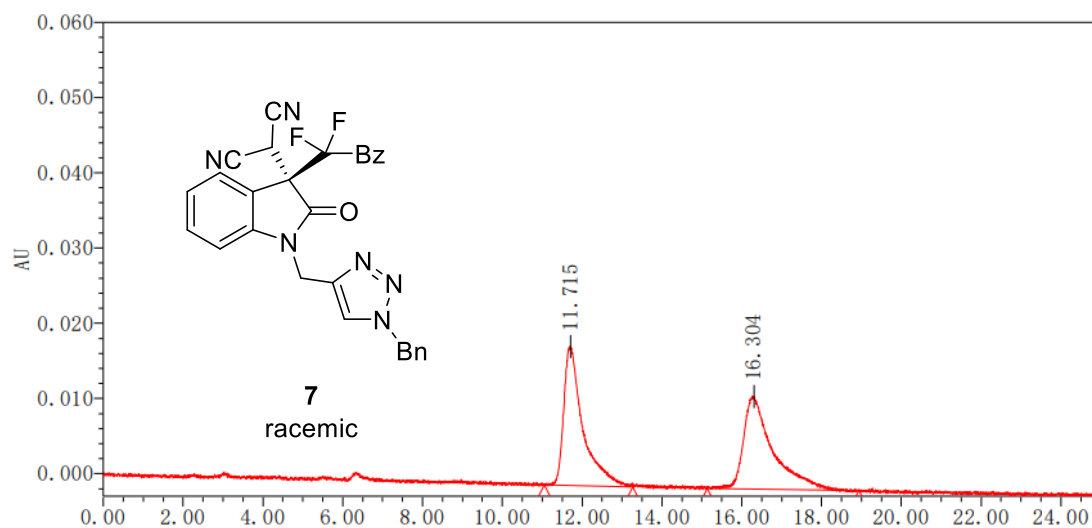

| Entry | RT min | Height mV | Area mV.sec | % Area % |
|-------|--------|-----------|-------------|----------|
| 1     | 11.715 | 18521     | 620498      | 49.79    |
| 2     | 16.304 | 12334     | 625837      | 50.21    |

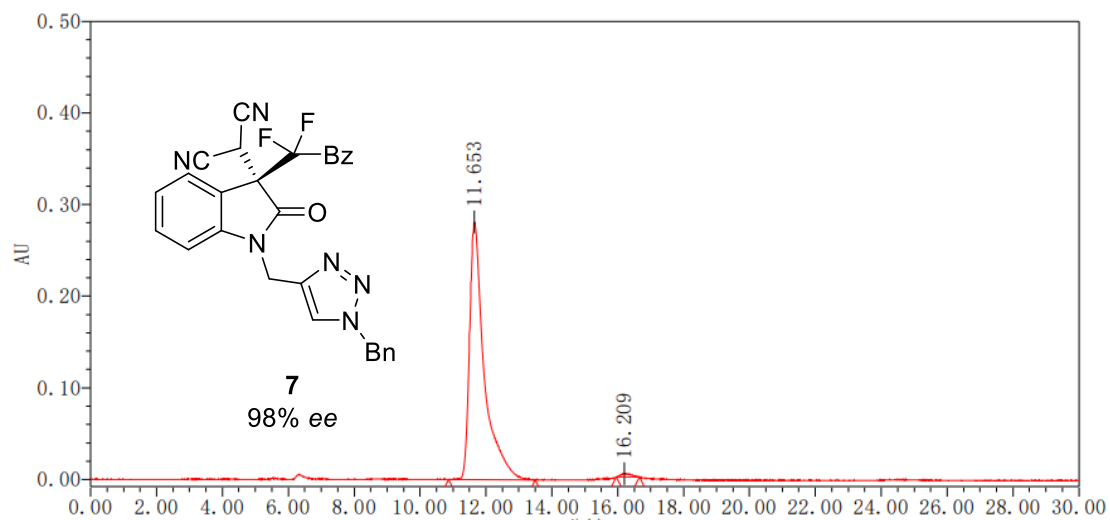

| Entry | RT min | Height mV | Area mV.sec | % Area % |
|-------|--------|-----------|-------------|----------|
| 1     | 11.653 | 281041    | 8769299     | 99.03    |
| 2     | 16.209 | 3771      | 85930       | 0.97     |



## 9. References

- (1) X. Xie, S. Dong, K. Hong, J. Huang and X. Xu, Catalytic Asymmetric Difluoroalkylation Using in Situ Generated Difluoroenol Species as the Privileged Synthons, *Adv. Sci.*, 2024, **11**, 2307520.
- (2) J.-S. Yu, F.-M. Liao, W.-M. Gao, K. Liao, R.-L. Zuo and J. Zhou, Michael Addition Catalyzed by Chiral Secondary Amine Phosphoramidate Using Fluorinated Silyl Enol Ethers: Formation of Quaternary Carbon Stereocenters, *Angew. Chem., Int. Ed.*, 2015, **54**, 7381–7385.
- (3) E. Martinelli, A. Chiara, Vicini, M. Mancinelli, A. Mazzanti, P. Zani, L. Bernardi and M. Fochi, Catalytic Highly Enantioselective Transfer Hydrogenation of  $\beta$ -Trifluoromethyl Nitroalkenes. An Easy and General Entry to Optically Active  $\beta$ -Trifluoromethyl Amines, *Chem. Commun.*, 2015, **51**, 658–660.
- (4) Z.-X. Fang, Y.-M. Gong, B.-B. Liu, J. Zhang, X.-Y. Han, Z.-H. Liu and Y.-Q. Ning, Rh-Catalyzed Coupling Reactions of Fluoroalkyl N-Sulfonylhydrazones with Azides Leading to  $\alpha$ -Trifluoroethylated Imines, *Org. Lett.*, 2022, **24**, 8920–8924.
